# Supplementary material for: Effect of Electro-Acupuncture at ST36 and SP6 on the cAMP -CREB Pathway and mRNA Expression Profile in the Brainstem of Morphine Tolerant Mice
Source: Frontiers journal article supplement (doi:10.3389/fnins.2021.698967), 2021-08-27
Supplement: Data_Sheet_1.ZIP [file Data_Sheet_1.ZIP]

## Sheet: Sheet1
id	baseMean	BS-M+Sham	BS-M+EA	foldChange(BS-M+EA/BS-M+Sham)	log2FoldChange	pval	padj
ENSMUSG00000045392	7.57126	2.3892	12.7533	5.33791	2.41627	0.000834347	1
ENSMUSG00000031491	17.5202	9.85936	25.181	2.55402	1.35277	0.0015755	1
ENSMUSG00000056501	16.879	10.8495	22.9084	2.11146	1.07824	0.011648	1
ENSMUSG00000110195	16.6049	11.0525	22.1572	2.00472	1.0034	0.0183998	1
ENSMUSG00000048230	6.77693	3.41956	10.1343	2.96362	1.56736	0.0218381	1
ENSMUSG00000072473	5.65863	2.59393	8.72332	3.36297	1.74974	0.024152	1
ENSMUSG00000027801	14.8717	9.49039	20.253	2.13405	1.0936	0.026019	1
ENSMUSG00000036446	5.48771	2.23055	8.74487	3.92049	1.97103	0.026567	1
ENSMUSG00000005952	9.34411	5.46888	13.2193	2.41719	1.27333	0.0266361	1
ENSMUSG00000022357	13.4606	8.89566	18.0255	2.02632	1.01886	0.0297724	1
ENSMUSG00000035551	9.81359	6.01623	13.6109	2.26237	1.17784	0.0369217	1
ENSMUSG00000068079	5.36779	2.61549	8.1201	3.10462	1.63442	0.0383807	1
ENSMUSG00000057719	1.62216	0.205021	3.03931	14.8243	3.88989	0.0421198	1
ENSMUSG00000018126	8.67358	5.22503	12.1221	2.32001	1.21413	0.0470873	1
ENSMUSG00000017311	6.87062	13.7412	0	0	-Inf	4.1298e-05	0.247609
ENSMUSG00000036907	77.1599	105.071	49.2491	0.468723	-1.09319	0.00028248	0.769763
ENSMUSG00000063060	25.4455	34.7335	16.1575	0.465186	-1.10412	0.00149874	1
ENSMUSG00000038651	16.3077	23.5317	9.08378	0.386023	-1.37324	0.0027976	1
ENSMUSG00000021680	91.4407	141.885	40.9961	0.288938	-1.79117	0.00299799	1
ENSMUSG00000035896	25.4522	35.1792	15.7253	0.447005	-1.16164	0.00304692	1
ENSMUSG00000090272	8.06606	12.5748	3.55732	0.282893	-1.82167	0.0039444	1
ENSMUSG00000092210	19.6995	26.7578	12.6412	0.472429	-1.08183	0.00594156	1
ENSMUSG00000096768	163.913	247.651	80.1746	0.323741	-1.62709	0.0114125	1
ENSMUSG00000022026	11.2618	16.1071	6.41645	0.39836	-1.32785	0.0127557	1
ENSMUSG00000009654	1.4886	2.9772	0	0	-Inf	0.0133343	1
ENSMUSG00000001014	10.4162	14.9126	5.9198	0.396967	-1.33291	0.0148664	1
ENSMUSG00000026095	4.3112	7.03992	1.58248	0.224787	-2.15337	0.0175529	1
ENSMUSG00000022429	14.4066	19.3504	9.46272	0.48902	-1.03204	0.0252475	1
ENSMUSG00000074874	12.9917	17.627	8.35653	0.474077	-1.07681	0.0282029	1
ENSMUSG00000030217	6.50649	9.68181	3.33116	0.344063	-1.53925	0.0301904	1
ENSMUSG00000058163	4.77784	7.41997	2.1357	0.287832	-1.7967	0.0341987	1
ENSMUSG00000056829	6.61384	10.3111	2.91653	0.282853	-1.82188	0.0358621	1
ENSMUSG00000052477	1.30496	2.60993	0	0	-Inf	0.0374572	1
ENSMUSG00000071036	3.27815	5.39938	1.15693	0.214271	-2.22249	0.0380513	1
ENSMUSG00000028996	87.6971	148.149	27.245	0.183902	-2.44299	0.0390666	1
ENSMUSG00000035383	4.37686	6.79177	1.96194	0.288871	-1.7915	0.0419321	1
ENSMUSG00000036816	26.4139	37.1887	15.6391	0.420533	-1.24971	0.0428977	1
ENSMUSG00000024903	7.7277	10.9882	4.46724	0.40655	-1.2985	0.04324	1
ENSMUSG00000063415	304.135	425.993	182.278	0.427889	-1.22469	0.0439018	1
ENSMUSG00000049123	2.90382	4.79548	1.01215	0.211064	-2.24425	0.0454254	1
ENSMUSG00000030402	10.6361	14.4152	6.85708	0.475684	-1.07192	0.0462321	1
ENSMUSG00000022651	3.54398	5.85793	1.23002	0.209976	-2.2517	0.0480737	1
ENSMUSG00000091900	9.03217	14.5039	3.56043	0.245481	-2.02632	0.0482811	1
ENSMUSG00000038253	702.999	546.325	859.674	1.57356	0.65403	7.90633e-06	0.142211
ENSMUSG00000061048	118.665	82.9184	154.412	1.86222	0.89702	2.63049e-05	0.236574
ENSMUSG00000067724	196.171	155.546	236.795	1.52234	0.606294	5.5941e-05	0.251552
ENSMUSG00000038700	1618.02	1313.32	1922.73	1.46402	0.549939	0.00019434	0.699117
ENSMUSG00000034327	727.251	843.081	611.42	0.725221	-0.463508	0.000299569	0.769763
ENSMUSG00000022245	201.902	166.051	237.753	1.4318	0.517834	0.000473633	1
ENSMUSG00000025216	316.302	267.263	365.342	1.36698	0.450987	0.000854476	1
ENSMUSG00000045287	339.3	289.909	388.692	1.34074	0.423028	0.00115558	1
ENSMUSG00000044566	56.5206	42.3924	70.6488	1.66655	0.736861	0.00213319	1
ENSMUSG00000068735	1274.52	1111.15	1437.89	1.29406	0.3719	0.00241765	1
ENSMUSG00000097929	895.318	795.376	995.26	1.25131	0.323436	0.00253968	1
ENSMUSG00000032500	476.071	417.473	534.669	1.28073	0.356963	0.00259953	1
ENSMUSG00000009216	1273.55	1130.21	1416.88	1.25364	0.326127	0.00262877	1
ENSMUSG00000029819	337.514	271.818	403.21	1.48338	0.568891	0.00267637	1
ENSMUSG00000035934	783.793	694.658	872.928	1.25663	0.32956	0.00268758	1
ENSMUSG00000021448	380.656	330.461	430.852	1.30379	0.382714	0.00292416	1
ENSMUSG00000094910	1480.45	1325.97	1634.94	1.23301	0.30219	0.00293955	1
ENSMUSG00000022203	458.3	401.633	514.967	1.28218	0.358603	0.00308569	1
ENSMUSG00000079560	224.15	184.419	263.881	1.43088	0.516904	0.00318117	1
ENSMUSG00000028780	383.894	451.795	315.994	0.69942	-0.51577	0.00325933	1
ENSMUSG00000017756	184.352	154.853	213.85	1.38099	0.465698	0.00352072	1
ENSMUSG00000022197	1166.23	1004.18	1328.28	1.32275	0.403541	0.00371526	1
ENSMUSG00000046593	66.5805	51.7936	81.3675	1.57099	0.651677	0.00377975	1
ENSMUSG00000034361	377.879	321.405	434.354	1.35142	0.43448	0.00394012	1
ENSMUSG00000048332	448.57	501.446	395.694	0.789106	-0.341709	0.00443014	1
ENSMUSG00000021903	731.077	646.116	816.038	1.26299	0.336842	0.00464801	1
ENSMUSG00000034997	143.942	167.211	120.674	0.721684	-0.47056	0.00478174	1
ENSMUSG00000029491	25.0508	33.259	16.8426	0.506407	-0.981632	0.00515863	1
ENSMUSG00000007030	749.478	828.423	670.533	0.809409	-0.30506	0.00530848	1
ENSMUSG00000033730	41.5332	30.6177	52.4487	1.71302	0.776539	0.00559973	1
ENSMUSG00000034402	201.207	163.435	238.978	1.46222	0.548159	0.00592151	1
ENSMUSG00000047907	2997.84	2722.77	3272.91	1.20205	0.265499	0.00632784	1
ENSMUSG00000026395	43.991	54.9962	32.9857	0.599782	-0.73749	0.00669447	1
ENSMUSG00000001435	430.668	381.866	479.471	1.2556	0.328377	0.00688759	1
ENSMUSG00000074923	612.875	547.089	678.661	1.24049	0.310916	0.00703879	1
ENSMUSG00000023031	129.332	149.708	108.955	0.727788	-0.458411	0.00732429	1
ENSMUSG00000032327	154.777	115.283	194.271	1.68516	0.752882	0.0075342	1
ENSMUSG00000055435	367.494	324.761	410.227	1.26316	0.337042	0.00758808	1
ENSMUSG00000028197	418.548	498.935	338.16	0.677765	-0.561143	0.0077084	1
ENSMUSG00000031149	300.377	337.058	263.695	0.782342	-0.354128	0.00781659	1
ENSMUSG00000025902	146.45	168.397	124.503	0.739338	-0.435694	0.00802233	1
ENSMUSG00000022220	125.265	144.678	105.853	0.731643	-0.450788	0.00816553	1
ENSMUSG00000024598	144.895	118.702	171.088	1.44132	0.527388	0.00862662	1
ENSMUSG00000060803	1869.97	2146.46	1593.49	0.742384	-0.429763	0.00884172	1
ENSMUSG00000040250	356.872	397.945	315.799	0.793574	-0.333563	0.00914661	1
ENSMUSG00000064179	23.199	30.5853	15.8127	0.517005	-0.95175	0.00920229	1
ENSMUSG00000002007	441.209	488.476	393.942	0.806472	-0.310304	0.00963826	1
ENSMUSG00000042793	207.132	179.727	234.536	1.30495	0.383999	0.00967532	1
ENSMUSG00000071302	151.871	176.909	126.833	0.716938	-0.48008	0.009803	1
ENSMUSG00000024617	3979.37	3535.25	4423.48	1.25125	0.32337	0.0102373	1
ENSMUSG00000095362	116.061	148.059	84.063	0.567769	-0.816625	0.0105013	1
ENSMUSG00000016194	441.664	514.091	369.237	0.718233	-0.477477	0.0105285	1
ENSMUSG00000041046	110.172	91.2953	129.048	1.41352	0.499295	0.0105387	1
ENSMUSG00000032532	549.946	461.475	638.417	1.38343	0.468246	0.0105427	1
ENSMUSG00000040495	43.6002	32.7654	54.435	1.66135	0.732359	0.0106955	1
ENSMUSG00000046982	1130.77	1005.75	1255.79	1.2486	0.320317	0.0108545	1
ENSMUSG00000028004	122.235	99.6878	144.781	1.45235	0.538388	0.0110147	1
ENSMUSG00000038457	64.5225	51.6495	77.3955	1.49848	0.583496	0.0112243	1
ENSMUSG00000036972	177.923	148.236	207.611	1.40055	0.485989	0.0118593	1
ENSMUSG00000026211	439.748	393.434	486.062	1.23543	0.305019	0.0122786	1
ENSMUSG00000027204	356.736	317.315	396.156	1.24846	0.320152	0.0123135	1
ENSMUSG00000003657	3268.52	3595.65	2941.38	0.818039	-0.289759	0.012509	1
ENSMUSG00000024346	845.513	924.186	766.841	0.829748	-0.269255	0.0131367	1
ENSMUSG00000020431	7084	6511.32	7656.69	1.1759	0.23377	0.0135979	1
ENSMUSG00000035273	34.9793	24.9753	44.9833	1.80111	0.848888	0.0137788	1
ENSMUSG00000037872	578.355	635.291	521.419	0.820755	-0.284977	0.0138399	1
ENSMUSG00000036422	288.66	255.53	321.789	1.2593	0.332627	0.0139176	1
ENSMUSG00000068823	2063.75	2237.86	1889.64	0.844399	-0.244004	0.0143625	1
ENSMUSG00000048905	48.9807	38.3899	59.5714	1.55175	0.633892	0.0145068	1
ENSMUSG00000032890	5247.42	4825.31	5669.52	1.17495	0.232605	0.0147241	1
ENSMUSG00000031561	1531.94	1391.76	1672.12	1.20144	0.264768	0.0150861	1
ENSMUSG00000033855	101.002	85.0549	116.948	1.37497	0.459405	0.0153913	1
ENSMUSG00000078201	148.764	128.292	169.236	1.31915	0.39961	0.0155862	1
ENSMUSG00000047033	60.2088	48.5113	71.9064	1.48226	0.567798	0.0156633	1
ENSMUSG00000066113	332.114	276.205	388.023	1.40484	0.490403	0.0162088	1
ENSMUSG00000044317	60.65	72.0953	49.2047	0.682495	-0.551109	0.0165478	1
ENSMUSG00000029307	443.565	487.936	399.194	0.818127	-0.289604	0.0166324	1
ENSMUSG00000032224	671.76	604.743	738.777	1.22164	0.288817	0.0166334	1
ENSMUSG00000092074	36.5558	27.9556	45.156	1.61527	0.691778	0.0168354	1
ENSMUSG00000031433	41.2422	50.6584	31.8261	0.62825	-0.67059	0.0170261	1
ENSMUSG00000012126	435.428	391.554	479.302	1.2241	0.291724	0.0172708	1
ENSMUSG00000002289	85.7877	69.4827	102.093	1.46933	0.555156	0.0173597	1
ENSMUSG00000044646	132.651	114.163	151.14	1.32389	0.404788	0.0173988	1
ENSMUSG00000026750	2752.59	2974.58	2530.6	0.850744	-0.233202	0.0174628	1
ENSMUSG00000075394	515.833	448.969	582.698	1.29786	0.376133	0.0182845	1
ENSMUSG00000001029	53.7394	64.2821	43.1967	0.671987	-0.573496	0.0186285	1
ENSMUSG00000039477	1764.71	1619.76	1909.66	1.17898	0.237537	0.0186491	1
ENSMUSG00000079022	96.9989	112.598	81.3996	0.72292	-0.468091	0.0188197	1
ENSMUSG00000020183	588.815	663.813	513.817	0.774039	-0.369522	0.0189004	1
ENSMUSG00000029868	26.9944	19.7476	34.2411	1.73393	0.794048	0.0189599	1
ENSMUSG00000041660	162.497	185.572	139.421	0.751302	-0.412534	0.0196616	1
ENSMUSG00000041544	795.239	725.754	864.725	1.19149	0.252761	0.0202773	1
ENSMUSG00000021943	98.0919	77.3101	118.874	1.53762	0.620701	0.0210049	1
ENSMUSG00000074004	18.8606	13.0278	24.6935	1.89545	0.922539	0.0210957	1
ENSMUSG00000055485	1208.44	1108.08	1308.8	1.18114	0.240182	0.0211566	1
ENSMUSG00000021587	485.297	439.868	530.725	1.20655	0.270893	0.0212154	1
ENSMUSG00000060735	58.5277	47.7379	69.3175	1.45204	0.538086	0.0212718	1
ENSMUSG00000021313	4251.91	3931.26	4572.56	1.16313	0.218012	0.0213939	1
ENSMUSG00000002015	1469.53	1591	1348.06	0.847304	-0.239048	0.0214041	1
ENSMUSG00000022231	800.166	731.058	869.274	1.18906	0.249825	0.0217639	1
ENSMUSG00000048439	136.587	116.699	156.475	1.34085	0.423146	0.0218121	1
ENSMUSG00000035126	162.773	139.654	185.892	1.33108	0.412602	0.0218598	1
ENSMUSG00000037541	1291.67	1186.57	1396.78	1.17716	0.235311	0.0219415	1
ENSMUSG00000031231	3845.58	4151.55	3539.62	0.852603	-0.230054	0.0220483	1
ENSMUSG00000000305	468.74	424.317	513.163	1.20939	0.274275	0.0224837	1
ENSMUSG00000030867	22.0699	28.3243	15.8154	0.558368	-0.840711	0.0225272	1
ENSMUSG00000031789	79.3673	66.4901	92.2445	1.38734	0.472323	0.0225892	1
ENSMUSG00000054737	94.5439	112.097	76.9909	0.686825	-0.541985	0.0226207	1
ENSMUSG00000029304	1897.83	2098.28	1697.38	0.808936	-0.305903	0.0227494	1
ENSMUSG00000095139	234.51	261.055	207.966	0.796637	-0.328006	0.0227995	1
ENSMUSG00000031562	142.238	160.725	123.751	0.769955	-0.377154	0.0228016	1
ENSMUSG00000042514	111.558	95.676	127.441	1.332	0.413596	0.022811	1
ENSMUSG00000026241	328.927	295.759	362.096	1.22429	0.291949	0.0232354	1
ENSMUSG00000027959	115.217	131.594	98.841	0.751107	-0.41291	0.0233239	1
ENSMUSG00000010660	446.185	404.076	488.294	1.20842	0.273123	0.0234543	1
ENSMUSG00000090550	60.569	42.6096	78.5284	1.84297	0.882035	0.0236534	1
ENSMUSG00000054871	113.208	97.5546	128.861	1.32091	0.401529	0.023674	1
ENSMUSG00000029009	1101.44	1011.12	1191.77	1.17866	0.237151	0.0237086	1
ENSMUSG00000000530	355.555	390.696	320.413	0.820109	-0.286113	0.024039	1
ENSMUSG00000035357	86.631	73.2142	100.048	1.36651	0.450494	0.0242437	1
ENSMUSG00000048763	1068.01	980.389	1155.63	1.17874	0.237249	0.0242696	1
ENSMUSG00000004043	116.331	99.9597	132.703	1.32757	0.408783	0.0244582	1
ENSMUSG00000062175	20.4446	14.4346	26.4545	1.83271	0.873976	0.0245992	1
ENSMUSG00000047507	2918.3	2654.36	3182.24	1.19887	0.261679	0.0248111	1
ENSMUSG00000021693	609.141	677.928	540.354	0.797067	-0.327227	0.0249335	1
ENSMUSG00000035697	206.862	230.046	183.677	0.798435	-0.324753	0.025283	1
ENSMUSG00000037843	809.468	705.152	913.785	1.29587	0.373922	0.0253211	1
ENSMUSG00000041734	506.856	460.48	553.232	1.20142	0.264744	0.0254314	1
ENSMUSG00000024793	66.0215	78.8247	53.2183	0.675148	-0.566725	0.025504	1
ENSMUSG00000010476	1020.2	907.128	1133.27	1.24929	0.321107	0.026001	1
ENSMUSG00000042988	65.267	79.3305	51.2034	0.645444	-0.631637	0.0261127	1
ENSMUSG00000001988	188.761	223.396	154.125	0.689919	-0.535502	0.0262141	1
ENSMUSG00000027849	530.87	483.341	578.399	1.19667	0.259023	0.0262244	1
ENSMUSG00000028139	32.9647	25.3307	40.5988	1.60275	0.680552	0.0263447	1
ENSMUSG00000019916	601.856	655.255	548.457	0.837013	-0.256678	0.0265975	1
ENSMUSG00000021453	335.195	302.383	368.007	1.21703	0.28336	0.0274295	1
ENSMUSG00000051726	223.929	194.577	253.28	1.30169	0.38039	0.0276449	1
ENSMUSG00000038007	305.841	336.57	275.112	0.817398	-0.29089	0.0281362	1
ENSMUSG00000018848	614.017	666.866	561.168	0.8415	-0.248965	0.0283432	1
ENSMUSG00000062981	637.198	691.899	582.497	0.841881	-0.248312	0.0284991	1
ENSMUSG00000042448	22.3354	28.6783	15.9925	0.557651	-0.842566	0.0287514	1
ENSMUSG00000032036	930.739	855.184	1006.3	1.1767	0.234748	0.0290118	1
ENSMUSG00000029869	1744.95	1613.67	1876.23	1.16271	0.217492	0.0291789	1
ENSMUSG00000020607	499.307	454.111	544.503	1.19905	0.261895	0.0291954	1
ENSMUSG00000006941	1451.73	1564.85	1338.61	0.855425	-0.225287	0.0293072	1
ENSMUSG00000047773	138.556	117.27	159.843	1.36304	0.446826	0.0295237	1
ENSMUSG00000031586	48.5028	57.6114	39.3941	0.683791	-0.548372	0.0296546	1
ENSMUSG00000040978	44.2682	35.4207	53.1156	1.49956	0.58454	0.0299066	1
ENSMUSG00000020949	1542.3	1660.36	1424.25	0.8578	-0.221287	0.0299981	1
ENSMUSG00000020928	105.238	119.789	90.6868	0.757057	-0.401526	0.0302505	1
ENSMUSG00000036395	37.9591	26.0649	49.8533	1.91266	0.935578	0.030485	1
ENSMUSG00000053310	457.992	381.955	534.029	1.39815	0.483516	0.0306524	1
ENSMUSG00000060284	39.1248	30.8856	47.364	1.53353	0.616856	0.0306924	1
ENSMUSG00000035045	185.73	164.944	206.516	1.25204	0.324275	0.0307585	1
ENSMUSG00000038756	43.7374	32.7189	54.7558	1.67352	0.742886	0.0310951	1
ENSMUSG00000073530	58.1287	72.6439	43.6136	0.600375	-0.736065	0.0310992	1
ENSMUSG00000019763	612.664	672.395	552.932	0.822331	-0.282208	0.0318908	1
ENSMUSG00000027833	111.042	146.572	75.5135	0.515199	-0.956799	0.0321533	1
ENSMUSG00000021025	628.842	532.898	724.786	1.36008	0.443696	0.032426	1
ENSMUSG00000112449	56.5332	67.9226	45.1438	0.664635	-0.589365	0.0324863	1
ENSMUSG00000000263	3494.21	3186.75	3801.67	1.19296	0.254549	0.0326123	1
ENSMUSG00000046743	477.559	435.08	520.038	1.19527	0.257335	0.0328332	1
ENSMUSG00000038351	1983.3	1837.23	2129.38	1.15902	0.212905	0.0334598	1
ENSMUSG00000051048	263.255	230.148	296.362	1.2877	0.364801	0.0334995	1
ENSMUSG00000039197	1008.65	1088.55	928.762	0.853211	-0.229025	0.0336552	1
ENSMUSG00000048251	200.537	178.837	222.238	1.24268	0.313455	0.0338801	1
ENSMUSG00000024565	388.924	343.723	434.124	1.26301	0.336861	0.0342161	1
ENSMUSG00000050954	369.634	335.973	403.295	1.20038	0.263493	0.0342199	1
ENSMUSG00000021037	2193.89	2351.15	2036.64	0.866234	-0.207171	0.0349533	1
ENSMUSG00000000861	334.562	303.086	366.038	1.2077	0.272268	0.0349928	1
ENSMUSG00000026934	48.3023	58.0766	38.5279	0.663398	-0.592053	0.0351154	1
ENSMUSG00000052759	43.1125	34.8176	51.4073	1.47647	0.562156	0.0351361	1
ENSMUSG00000036523	130.175	114.018	146.331	1.2834	0.359975	0.0351408	1
ENSMUSG00000041703	26.1166	19.313	32.9202	1.70456	0.769403	0.0360214	1
ENSMUSG00000024486	271.368	298.277	244.458	0.819567	-0.287066	0.03605	1
ENSMUSG00000036862	525.059	480.816	569.302	1.18403	0.243709	0.0361483	1
ENSMUSG00000044949	130.691	114.363	147.019	1.28555	0.362385	0.0362068	1
ENSMUSG00000031844	59.7967	69.8927	49.7007	0.7111	-0.491876	0.0363764	1
ENSMUSG00000050556	1965.82	1825.13	2106.5	1.15417	0.206853	0.0365218	1
ENSMUSG00000032936	2748.47	2362.79	3134.14	1.32646	0.407576	0.0365679	1
ENSMUSG00000032259	393.151	357.668	428.634	1.19841	0.261126	0.0367003	1
ENSMUSG00000027878	616.075	565.774	666.376	1.17781	0.236112	0.0367507	1
ENSMUSG00000035187	66.3953	76.8607	55.9298	0.727678	-0.458629	0.0368298	1
ENSMUSG00000066026	224.648	201.213	248.083	1.23294	0.302098	0.0370476	1
ENSMUSG00000039831	181.215	201.446	160.984	0.79914	-0.32348	0.037186	1
ENSMUSG00000061353	1298.1	1447.61	1148.59	0.793439	-0.333808	0.0373858	1
ENSMUSG00000061751	1100.31	1017.97	1182.64	1.16177	0.216319	0.0374383	1
ENSMUSG00000029090	441.963	403.341	480.584	1.19151	0.252789	0.0375212	1
ENSMUSG00000030376	745.423	686.69	804.157	1.17106	0.227818	0.0376916	1
ENSMUSG00000052957	94.6875	107.912	81.4632	0.754905	-0.405633	0.0377931	1
ENSMUSG00000025787	13.4953	9.02269	17.968	1.99142	0.9938	0.0379405	1
ENSMUSG00000038692	340.527	297.065	383.989	1.29261	0.370287	0.0383568	1
ENSMUSG00000001672	21.0936	14.8534	27.3339	1.84024	0.879898	0.0388469	1
ENSMUSG00000022485	381.046	316.778	445.315	1.40577	0.491357	0.0393971	1
ENSMUSG00000060924	626.077	575.724	676.431	1.17492	0.232565	0.0394072	1
ENSMUSG00000020804	50.2595	59.2163	41.3027	0.69749	-0.519756	0.0394106	1
ENSMUSG00000019970	3092.73	2185.35	4000.11	1.83042	0.872175	0.039747	1
ENSMUSG00000021732	94.5023	81.3652	107.639	1.32292	0.403724	0.0397681	1
ENSMUSG00000021061	8865.12	8269.08	9461.15	1.14416	0.194288	0.039859	1
ENSMUSG00000055471	338.777	308.153	369.4	1.19876	0.261539	0.0400493	1
ENSMUSG00000067081	117.761	102.818	132.705	1.29068	0.368135	0.0405942	1
ENSMUSG00000019864	402.986	438.357	367.614	0.838618	-0.253914	0.0409126	1
ENSMUSG00000043079	528.061	484.181	571.941	1.18125	0.240319	0.0409381	1
ENSMUSG00000066721	83.8662	71.8483	95.8841	1.33454	0.416338	0.0411421	1
ENSMUSG00000023036	533.725	485.053	582.396	1.20069	0.263858	0.0414367	1
ENSMUSG00000031323	54.3241	45.1137	63.5345	1.40832	0.493975	0.0415819	1
ENSMUSG00000031383	20.8326	26.3522	15.3131	0.581092	-0.78316	0.0416003	1
ENSMUSG00000000355	101.846	115.631	88.0612	0.761571	-0.39295	0.041647	1
ENSMUSG00000026921	411.458	449.236	373.68	0.831813	-0.265669	0.0422734	1
ENSMUSG00000042834	1380.64	1477.3	1283.97	0.869132	-0.202353	0.0424831	1
ENSMUSG00000034684	372.877	340.159	405.595	1.19237	0.25383	0.0426337	1
ENSMUSG00000043336	30.1655	36.9646	23.3664	0.63213	-0.661706	0.0426846	1
ENSMUSG00000063646	1345.53	1247.91	1443.14	1.15644	0.209691	0.0429181	1
ENSMUSG00000027173	44.9676	53.9083	36.0269	0.668301	-0.581431	0.0435048	1
ENSMUSG00000038060	190.224	168.184	212.264	1.2621	0.335823	0.043661	1
ENSMUSG00000042496	385.783	352.714	418.852	1.18751	0.247943	0.0439323	1
ENSMUSG00000032579	580.597	533.956	627.237	1.1747	0.232291	0.0439934	1
ENSMUSG00000031688	32.181	25.3436	39.0183	1.53957	0.622529	0.0442346	1
ENSMUSG00000021712	371.695	411.084	332.306	0.808364	-0.306922	0.0442545	1
ENSMUSG00000022577	1450.63	1340.55	1560.72	1.16423	0.219379	0.0443671	1
ENSMUSG00000027680	918.374	995.255	841.494	0.845506	-0.242112	0.0444918	1
ENSMUSG00000071637	68.5866	57.967	79.2062	1.3664	0.450383	0.0445666	1
ENSMUSG00000091636	410.943	524.715	297.17	0.566345	-0.820246	0.0446564	1
ENSMUSG00000036459	95.9004	82.902	108.899	1.31359	0.39351	0.0446607	1
ENSMUSG00000052776	32.9618	39.7439	26.1797	0.658711	-0.602282	0.0447531	1
ENSMUSG00000034687	429.609	374.152	485.065	1.29644	0.374553	0.0449504	1
ENSMUSG00000061474	452.309	490.24	414.379	0.845258	-0.242536	0.0449617	1
ENSMUSG00000029055	1160.58	1076.58	1244.57	1.15604	0.209186	0.0452145	1
ENSMUSG00000020866	3898.28	3639.04	4157.53	1.14248	0.19217	0.0453708	1
ENSMUSG00000024210	48.8227	40.0372	57.6083	1.43887	0.524934	0.0453713	1
ENSMUSG00000002578	202.669	181.956	223.382	1.22767	0.295922	0.0455204	1
ENSMUSG00000023988	430.302	393.772	466.831	1.18554	0.245541	0.0455377	1
ENSMUSG00000021986	411.179	372.551	449.806	1.20737	0.271866	0.0459785	1
ENSMUSG00000021007	229.735	206.89	252.579	1.22084	0.28787	0.0460018	1
ENSMUSG00000076435	645.981	595.326	696.637	1.17018	0.226727	0.0461849	1
ENSMUSG00000021774	852.369	916.565	788.173	0.85992	-0.217725	0.0463474	1
ENSMUSG00000023106	859.739	923.805	795.674	0.861301	-0.215411	0.0464167	1
ENSMUSG00000018678	319.003	290.403	347.602	1.19696	0.25938	0.0468942	1
ENSMUSG00000021250	214.103	234.999	193.207	0.822161	-0.282507	0.0468983	1
ENSMUSG00000028036	14.3889	18.7741	10.0037	0.532845	-0.908211	0.0469779	1
ENSMUSG00000053007	171.647	189.872	153.422	0.80803	-0.30752	0.0470412	1
ENSMUSG00000023845	448.703	403.867	493.539	1.22203	0.289284	0.0471323	1
ENSMUSG00000030922	186.444	208.859	164.028	0.785353	-0.348587	0.0473631	1
ENSMUSG00000047842	2375.11	2213.56	2536.67	1.14597	0.196564	0.0476103	1
ENSMUSG00000027160	142.805	159.176	126.434	0.794304	-0.332238	0.0486165	1
ENSMUSG00000041471	70.09	59.7921	80.3878	1.34446	0.427022	0.0486342	1
ENSMUSG00000029442	70.7128	81.2064	60.2193	0.741559	-0.431367	0.04877	1
ENSMUSG00000024451	270.257	295.525	244.989	0.828996	-0.270563	0.0489759	1
ENSMUSG00000047583	260.728	236.304	285.152	1.20672	0.271086	0.0490046	1
ENSMUSG00000019802	906.6	973.509	839.69	0.862539	-0.213338	0.0492678	1
ENSMUSG00000031639	52.5834	61.472	43.6948	0.710808	-0.492468	0.0494415	1
ENSMUSG00000034818	1432.7	1335.49	1529.9	1.14557	0.196059	0.0495181	1
ENSMUSG00000042757	418.642	383.595	453.689	1.18273	0.24212	0.0496528	1
ENSMUSG00000034308	201.584	221.96	181.209	0.816403	-0.292647	0.0497475	1
ENSMUSG00000041378	689.271	761.079	617.463	0.8113	-0.301692	0.0497842	1
ENSMUSG00000033774	14.1094	9.77821	18.4405	1.88588	0.915237	0.0503091	1
ENSMUSG00000063268	108.292	94.8072	121.777	1.28447	0.36117	0.0503734	1
ENSMUSG00000038607	6.41286	9.30381	3.52191	0.378545	-1.40146	0.0503946	1
ENSMUSG00000105096	1.62348	0.205021	3.04194	14.8372	3.89115	0.0504451	1
ENSMUSG00000030002	1794.24	1917.55	1670.94	0.871393	-0.198605	0.0506684	1
ENSMUSG00000031654	1107.33	1007.58	1207.08	1.198	0.260631	0.0507516	1
ENSMUSG00000024420	750.423	694.623	806.223	1.16066	0.214948	0.0509673	1
ENSMUSG00000020873	849.236	912.297	786.174	0.861752	-0.214655	0.051331	1
ENSMUSG00000043219	154.413	118.087	190.739	1.61524	0.691748	0.0514555	1
ENSMUSG00000031981	9.09208	5.65927	12.5249	2.21316	1.14611	0.0515198	1
ENSMUSG00000047591	52.3161	38.9271	65.7051	1.6879	0.755229	0.0515439	1
ENSMUSG00000038909	1698.43	1814.29	1582.58	0.872287	-0.197126	0.0517146	1
ENSMUSG00000026768	23.597	18.0885	29.1055	1.60906	0.686215	0.0517717	1
ENSMUSG00000030094	502.962	462.946	542.977	1.17287	0.230046	0.0519828	1
ENSMUSG00000043262	279.896	305.282	254.511	0.833694	-0.262411	0.0521289	1
ENSMUSG00000030606	31.0751	37.6413	24.5088	0.651116	-0.619014	0.0522852	1
ENSMUSG00000053395	328.068	299.649	356.487	1.18968	0.250576	0.0523592	1
ENSMUSG00000022687	495.563	456.203	534.924	1.17256	0.229659	0.0526505	1
ENSMUSG00000000247	49.3155	40.6424	57.9885	1.4268	0.512782	0.0526723	1
ENSMUSG00000000125	241.242	218.143	264.341	1.21178	0.277128	0.0531807	1
ENSMUSG00000091705	50.1799	41.2901	59.0697	1.4306	0.51662	0.0532058	1
ENSMUSG00000001891	460.336	497.656	423.016	0.850017	-0.234436	0.0537789	1
ENSMUSG00000020218	53.9561	39.6137	68.2985	1.72411	0.785855	0.053907	1
ENSMUSG00000022103	735.339	680.734	789.944	1.16043	0.214659	0.0541202	1
ENSMUSG00000035069	211.374	232.033	190.715	0.821934	-0.282906	0.0542111	1
ENSMUSG00000048852	2.51986	4.25175	0.787974	0.185329	-2.43184	0.0542479	1
ENSMUSG00000026609	3.39893	5.4105	1.38735	0.256419	-1.96342	0.054319	1
ENSMUSG00000090673	84.9386	71.1079	98.7693	1.38901	0.474052	0.0543875	1
ENSMUSG00000021685	90.9493	102.901	78.9979	0.767709	-0.381368	0.0547277	1
ENSMUSG00000031715	203.592	227.112	180.071	0.792872	-0.334841	0.0548109	1
ENSMUSG00000006221	4.52519	6.82358	2.22681	0.32634	-1.61555	0.0549176	1
ENSMUSG00000037358	24.311	29.9099	18.712	0.625611	-0.676662	0.05506	1
ENSMUSG00000041763	507.091	547.474	466.709	0.852476	-0.230269	0.055086	1
ENSMUSG00000095845	2.48913	4.19112	0.78714	0.187811	-2.41264	0.0552321	1
ENSMUSG00000001985	1626.89	1508.44	1745.33	1.15704	0.210436	0.0554201	1
ENSMUSG00000103770	76.6489	66.0766	87.2212	1.32	0.400538	0.0556481	1
ENSMUSG00000057572	371.817	402.789	340.844	0.846208	-0.240915	0.0562501	1
ENSMUSG00000057098	739.344	668.732	809.956	1.21118	0.276415	0.056426	1
ENSMUSG00000079056	1946.52	1816.01	2077.03	1.14373	0.19375	0.0564382	1
ENSMUSG00000027474	165.54	182.771	148.308	0.811443	-0.301439	0.0569167	1
ENSMUSG00000078144	10.8929	7.2034	14.5824	2.02438	1.01748	0.0569184	1
ENSMUSG00000021363	30.4436	23.1985	37.6887	1.62462	0.7001	0.0577279	1
ENSMUSG00000050926	27.8409	21.9258	33.756	1.53956	0.622515	0.0578587	1
ENSMUSG00000034936	601.532	452.565	750.499	1.65832	0.729726	0.0578974	1
ENSMUSG00000034371	252.93	230.009	275.852	1.19931	0.262207	0.0580391	1
ENSMUSG00000038349	1148.74	1282	1015.47	0.792095	-0.336255	0.0581811	1
ENSMUSG00000060429	91.2016	79.4825	102.921	1.29489	0.372824	0.0582065	1
ENSMUSG00000062012	413.016	379.111	446.92	1.17886	0.237395	0.0582985	1
ENSMUSG00000033157	330.331	358.538	302.124	0.842655	-0.246986	0.05844	1
ENSMUSG00000037636	17.0315	12.4429	21.6201	1.73754	0.79705	0.0585593	1
ENSMUSG00000033488	300.443	274.062	326.824	1.19252	0.254008	0.0586757	1
ENSMUSG00000042662	1423.13	1518.31	1327.95	0.874627	-0.193261	0.0588636	1
ENSMUSG00000067235	19.1346	14.1945	24.0746	1.69606	0.762184	0.0589715	1
ENSMUSG00000045534	134.571	119.021	150.122	1.2613	0.33491	0.0590013	1
ENSMUSG00000032807	52.3844	43.8059	60.9628	1.39166	0.476804	0.059317	1
ENSMUSG00000072941	407.242	364.82	449.664	1.23256	0.301663	0.0593317	1
ENSMUSG00000029089	92.9484	104.927	80.97	0.77168	-0.373925	0.0595246	1
ENSMUSG00000026656	58.6582	49.5782	67.7381	1.36629	0.450262	0.0596246	1
ENSMUSG00000074345	37.4357	30.4042	44.4672	1.46253	0.54847	0.0597464	1
ENSMUSG00000074406	213.423	191.48	235.366	1.2292	0.297718	0.0600197	1
ENSMUSG00000067212	439.713	479.821	399.605	0.832822	-0.263921	0.0600683	1
ENSMUSG00000047344	115.919	133.312	98.5269	0.739069	-0.436219	0.0601999	1
ENSMUSG00000059891	13.5168	9.44005	17.5935	1.86371	0.89818	0.0602247	1
ENSMUSG00000058093	8.99193	12.2764	5.70745	0.464912	-1.10497	0.0603698	1
ENSMUSG00000038481	876.192	965.486	786.897	0.815027	-0.295081	0.0604016	1
ENSMUSG00000031111	383.568	427.267	339.869	0.795449	-0.330159	0.0605647	1
ENSMUSG00000000766	102.455	89.5388	115.372	1.28851	0.365705	0.0609338	1
ENSMUSG00000028111	112.617	125.558	99.6766	0.793866	-0.333032	0.0610266	1
ENSMUSG00000048078	3263.99	3057.62	3470.37	1.13499	0.18268	0.0613323	1
ENSMUSG00000053338	21.8553	27.1064	16.6043	0.612562	-0.707072	0.0613346	1
ENSMUSG00000032105	11.7834	8.06379	15.5029	1.92254	0.943011	0.0613699	1
ENSMUSG00000038665	531.976	492.533	571.419	1.16016	0.21433	0.0614838	1
ENSMUSG00000020019	141.092	125.796	156.389	1.2432	0.314056	0.0615272	1
ENSMUSG00000071866	23382.8	24830	21935.7	0.883436	-0.178803	0.061669	1
ENSMUSG00000043505	14.8357	19.0017	10.6697	0.561515	-0.832604	0.0617319	1
ENSMUSG00000001943	100.356	112.67	88.0406	0.7814	-0.355867	0.0618006	1
ENSMUSG00000061762	526.662	487.499	565.826	1.16067	0.21496	0.0618207	1
ENSMUSG00000028992	453.494	620.074	286.914	0.462709	-1.11182	0.0619155	1
ENSMUSG00000055546	1.01754	2.03509	0	0	-Inf	0.0619356	1
ENSMUSG00000074001	25.6981	31.4156	19.9806	0.636008	-0.652882	0.0621824	1
ENSMUSG00000000934	343.873	315.333	372.413	1.18102	0.240029	0.062241	1
ENSMUSG00000018604	64.6957	76.9668	52.4246	0.681132	-0.553993	0.0625385	1
ENSMUSG00000038668	1160.56	1236.82	1084.29	0.876681	-0.189877	0.0631088	1
ENSMUSG00000035829	720.388	668.8	771.976	1.15427	0.20698	0.0633242	1
ENSMUSG00000051980	14.407	10.3267	18.4872	1.79023	0.840143	0.0633351	1
ENSMUSG00000053070	73.3913	63.4227	83.3599	1.31435	0.394353	0.0633561	1
ENSMUSG00000053279	3153.85	3395.25	2912.46	0.857804	-0.22128	0.0633853	1
ENSMUSG00000048402	199.344	218.631	180.057	0.82357	-0.280037	0.0636331	1
ENSMUSG00000033453	145.083	129.767	160.4	1.23606	0.305753	0.0639672	1
ENSMUSG00000022462	2688.61	2876.55	2500.66	0.869323	-0.202035	0.0641547	1
ENSMUSG00000018567	2145.87	2281.49	2010.24	0.88111	-0.182607	0.0641613	1
ENSMUSG00000045514	2.75183	1.0011	4.50256	4.4976	2.16915	0.064475	1
ENSMUSG00000053141	2479.27	2261.43	2697.1	1.19265	0.254177	0.0644761	1
ENSMUSG00000007682	321.908	356.817	286.999	0.80433	-0.31414	0.0650581	1
ENSMUSG00000052180	2.11006	3.62274	0.597376	0.164896	-2.60037	0.0652804	1
ENSMUSG00000069372	85.4763	96.983	73.9697	0.762708	-0.390797	0.0654348	1
ENSMUSG00000070327	712.56	661.887	763.232	1.15312	0.205537	0.0659172	1
ENSMUSG00000016386	230.839	209.723	251.956	1.20137	0.264686	0.0661893	1
ENSMUSG00000051354	3.01227	4.84134	1.18319	0.244393	-2.03273	0.0664106	1
ENSMUSG00000090935	140.119	155.129	125.109	0.806487	-0.310277	0.0666651	1
ENSMUSG00000040254	88.4189	99.8058	77.0319	0.771818	-0.373668	0.0667477	1
ENSMUSG00000030054	7.16864	10.0218	4.3155	0.430612	-1.21554	0.0669001	1
ENSMUSG00000034463	136.21	117.819	154.6	1.31217	0.391959	0.0671732	1
ENSMUSG00000044221	1160.43	1251.06	1069.8	0.855114	-0.225811	0.067244	1
ENSMUSG00000024873	561.387	520.372	602.401	1.15764	0.211182	0.0672933	1
ENSMUSG00000069633	43.863	36.6577	51.0683	1.39311	0.478313	0.0673136	1
ENSMUSG00000040610	48.7949	37.2248	60.365	1.62163	0.697449	0.0674349	1
ENSMUSG00000021379	551.23	500.867	601.592	1.2011	0.264359	0.0674465	1
ENSMUSG00000020937	366.971	337.403	396.538	1.17526	0.232985	0.0676017	1
ENSMUSG00000000889	308.058	241.724	374.393	1.54884	0.631191	0.0681213	1
ENSMUSG00000020288	338.282	366.09	310.474	0.848081	-0.237726	0.0682716	1
ENSMUSG00000068876	396.141	365.529	426.753	1.1675	0.223417	0.0685264	1
ENSMUSG00000044224	521.281	560.733	481.829	0.859283	-0.218795	0.0686088	1
ENSMUSG00000028354	968.167	904.131	1032.2	1.14165	0.191123	0.0686983	1
ENSMUSG00000029122	466.914	432.499	501.329	1.15915	0.213062	0.0688131	1
ENSMUSG00000015656	35895.4	38030.9	33759.8	0.887695	-0.171863	0.068843	1
ENSMUSG00000006389	1.76216	0.40088	3.12345	7.79149	2.9619	0.0689444	1
ENSMUSG00000101523	18.7741	23.5248	14.0234	0.596114	-0.74634	0.06903	1
ENSMUSG00000030672	34.3517	40.6938	28.0096	0.688301	-0.538888	0.069447	1
ENSMUSG00000045573	4058.3	3760.12	4356.48	1.1586	0.212384	0.0695007	1
ENSMUSG00000037824	619.27	663.306	575.234	0.867223	-0.205526	0.0695331	1
ENSMUSG00000027217	247.276	225.422	269.131	1.1939	0.255679	0.0698209	1
ENSMUSG00000025078	243.716	222.446	264.986	1.19124	0.252459	0.070186	1
ENSMUSG00000024247	241.799	220.465	263.133	1.19354	0.255244	0.0703619	1
ENSMUSG00000079559	34.4894	40.8655	28.1133	0.687947	-0.53963	0.0703949	1
ENSMUSG00000060427	249.683	271.607	227.76	0.838563	-0.254008	0.0705271	1
ENSMUSG00000003271	94.3378	105.788	82.8871	0.783518	-0.351961	0.0705698	1
ENSMUSG00000024782	1725.93	1834.62	1617.25	0.881515	-0.181942	0.0707461	1
ENSMUSG00000075700	1468.42	1562.4	1374.45	0.879702	-0.184914	0.0709008	1
ENSMUSG00000020108	1451.33	1262.02	1640.63	1.3	0.378513	0.0709396	1
ENSMUSG00000110185	342.511	378.652	306.369	0.809105	-0.305601	0.0709404	1
ENSMUSG00000031258	27.2661	33.9405	20.5916	0.606695	-0.720956	0.0709895	1
ENSMUSG00000028274	246.321	268.063	224.579	0.837787	-0.255345	0.0711317	1
ENSMUSG00000033966	115.885	102.754	129.015	1.25557	0.328344	0.071174	1
ENSMUSG00000021245	340.081	367.411	312.752	0.851233	-0.232374	0.0713659	1
ENSMUSG00000037613	42.6599	50.4984	34.8215	0.689556	-0.53626	0.0717965	1
ENSMUSG00000033470	3.78192	5.83042	1.73341	0.297305	-1.74998	0.0720406	1
ENSMUSG00000028029	722.45	772.55	672.35	0.8703	-0.200416	0.0720848	1
ENSMUSG00000045994	2862.55	2688.33	3036.77	1.12961	0.175829	0.0723598	1
ENSMUSG00000020782	36.2665	28.3087	44.2243	1.56222	0.643594	0.072376	1
ENSMUSG00000010461	36.2228	42.7373	29.7082	0.695134	-0.524636	0.0726464	1
ENSMUSG00000026976	388.65	352.677	424.624	1.204	0.267838	0.0727594	1
ENSMUSG00000044562	142.495	157.051	127.939	0.814629	-0.295784	0.0728309	1
ENSMUSG00000056492	840.735	898.272	783.198	0.871894	-0.197775	0.0729833	1
ENSMUSG00000025024	207.509	226.679	188.339	0.830863	-0.267318	0.0730465	1
ENSMUSG00000034158	755.753	807.781	703.724	0.871181	-0.198956	0.0733093	1
ENSMUSG00000029911	297.996	327.749	268.243	0.818439	-0.289054	0.0735687	1
ENSMUSG00000068457	58.7057	67.405	50.0064	0.741879	-0.430745	0.0735851	1
ENSMUSG00000064065	198.055	176.385	219.724	1.24571	0.316964	0.0739474	1
ENSMUSG00000002428	237.069	263.448	210.69	0.799741	-0.322395	0.0741052	1
ENSMUSG00000030761	888.902	823.499	954.305	1.15884	0.212684	0.0741101	1
ENSMUSG00000020709	163.135	178.929	147.34	0.823454	-0.28024	0.0742199	1
ENSMUSG00000046093	1431.36	1331.86	1530.87	1.14942	0.200905	0.0742531	1
ENSMUSG00000038784	311.933	337.558	286.307	0.848173	-0.237569	0.0742822	1
ENSMUSG00000027673	2120.36	2251.44	1989.28	0.883559	-0.178602	0.0743128	1
ENSMUSG00000057503	5.07563	7.42291	2.72835	0.367557	-1.44396	0.0745277	1
ENSMUSG00000041710	292.233	259.25	325.217	1.25445	0.327058	0.0746307	1
ENSMUSG00000024036	147.826	130.389	165.264	1.26748	0.341957	0.0749167	1
ENSMUSG00000035305	27.2244	32.7572	21.6917	0.662197	-0.594668	0.0750055	1
ENSMUSG00000029648	1376.86	1495.21	1258.52	0.841701	-0.24862	0.0751093	1
ENSMUSG00000000581	550.028	600.433	499.624	0.832107	-0.265159	0.0752237	1
ENSMUSG00000059022	107.149	119.073	95.2239	0.799709	-0.322454	0.0753	1
ENSMUSG00000026604	238.579	217.786	259.372	1.19095	0.252112	0.0754383	1
ENSMUSG00000036327	589.545	548.201	630.89	1.15084	0.202684	0.0755038	1
ENSMUSG00000078771	342.332	369.108	315.555	0.854914	-0.226148	0.0755453	1
ENSMUSG00000032578	166.691	150.623	182.76	1.21336	0.279008	0.0756984	1
ENSMUSG00000040152	84.3259	73.6378	95.0139	1.29029	0.367692	0.0757105	1
ENSMUSG00000052557	860.244	784.895	935.593	1.192	0.253381	0.0757437	1
ENSMUSG00000004947	218.197	198.613	237.781	1.19721	0.259674	0.075778	1
ENSMUSG00000025870	493.542	448.562	538.523	1.20055	0.263701	0.0759466	1
ENSMUSG00000102752	90.5575	102.776	78.3392	0.762233	-0.391696	0.0760929	1
ENSMUSG00000024064	414.468	383.411	445.526	1.16201	0.216618	0.0764765	1
ENSMUSG00000027087	1096.77	1166.94	1026.6	0.879733	-0.184862	0.0764901	1
ENSMUSG00000029413	602.74	559.404	646.076	1.15494	0.207813	0.0765644	1
ENSMUSG00000020175	922.423	862.386	982.46	1.13924	0.188065	0.0765682	1
ENSMUSG00000039375	140.499	126.356	154.642	1.22386	0.291441	0.0765889	1
ENSMUSG00000004110	2552.23	2399.24	2705.21	1.12753	0.173162	0.0766744	1
ENSMUSG00000078451	36.4772	30.1618	42.7927	1.41877	0.504639	0.0767191	1
ENSMUSG00000021969	965.238	1044.37	886.101	0.848451	-0.237097	0.0767513	1
ENSMUSG00000040543	1875.56	1762.27	1988.84	1.12857	0.174494	0.0767591	1
ENSMUSG00000020037	331.471	304.927	358.014	1.1741	0.231554	0.0768848	1
ENSMUSG00000047161	4.34362	2.21726	6.46998	2.91801	1.54498	0.0771113	1
ENSMUSG00000059456	228.945	208.559	249.331	1.1955	0.25761	0.0773805	1
ENSMUSG00000075272	2.94698	1.20087	4.69308	3.90806	1.96645	0.0774823	1
ENSMUSG00000006715	91.9673	102.942	80.9921	0.786771	-0.345984	0.0774832	1
ENSMUSG00000079658	695.34	743.373	647.306	0.870769	-0.199637	0.0775164	1
ENSMUSG00000000489	262.484	284.124	240.845	0.847677	-0.238413	0.0775208	1
ENSMUSG00000025646	20.9508	25.7256	16.1761	0.628791	-0.669347	0.0775378	1
ENSMUSG00000068749	1672.04	1775.79	1568.29	0.883151	-0.179268	0.0776325	1
ENSMUSG00000024601	468.656	503.493	433.818	0.861615	-0.214884	0.0783269	1
ENSMUSG00000036944	4.78207	6.99548	2.56865	0.367187	-1.44541	0.0790623	1
ENSMUSG00000033788	361.201	392.803	329.6	0.839098	-0.253089	0.0791568	1
ENSMUSG00000058056	185.173	202.324	168.022	0.830457	-0.268022	0.0791992	1
ENSMUSG00000028717	94.9403	109.738	80.1423	0.730305	-0.45343	0.0793464	1
ENSMUSG00000022114	435.547	466.775	404.319	0.866197	-0.207234	0.0796591	1
ENSMUSG00000041193	64.2323	55.2821	73.1826	1.3238	0.404688	0.0799174	1
ENSMUSG00000039770	1430.36	1518.63	1342.08	0.88374	-0.178306	0.080098	1
ENSMUSG00000055102	9.55362	6.38425	12.723	1.99287	0.994847	0.080176	1
ENSMUSG00000028024	163.182	147.493	178.87	1.21273	0.278263	0.0806312	1
ENSMUSG00000023959	193.86	211.712	176.008	0.831353	-0.266468	0.0806878	1
ENSMUSG00000021000	690.801	737.98	643.623	0.872141	-0.197366	0.0807571	1
ENSMUSG00000024182	654.277	609.299	699.255	1.14764	0.198668	0.0809189	1
ENSMUSG00000035640	4029.65	3797.27	4262.04	1.1224	0.166583	0.0810105	1
ENSMUSG00000018474	11723.8	11059.5	12388.1	1.12013	0.163661	0.0811181	1
ENSMUSG00000020570	485.825	533.996	437.654	0.819582	-0.28704	0.081121	1
ENSMUSG00000018427	837.201	891.029	783.373	0.879178	-0.185773	0.0820706	1
ENSMUSG00000038540	43.9062	36.7821	51.0304	1.38737	0.472353	0.082344	1
ENSMUSG00000039850	904.302	845.379	963.224	1.1394	0.188272	0.0823501	1
ENSMUSG00000037477	2.59591	4.21303	0.978798	0.232326	-2.10578	0.0824922	1
ENSMUSG00000050088	237.69	217.73	257.651	1.18335	0.242878	0.082715	1
ENSMUSG00000022285	6325.18	6686.26	5964.1	0.891994	-0.164894	0.0828651	1
ENSMUSG00000046675	77.8208	87.6333	68.0084	0.776056	-0.365767	0.0831877	1
ENSMUSG00000079109	253.87	276.642	231.097	0.835364	-0.259523	0.0834514	1
ENSMUSG00000079110	90.8062	101.334	80.2788	0.792223	-0.336021	0.0835917	1
ENSMUSG00000066438	829.373	775.507	883.24	1.13892	0.187666	0.0838042	1
ENSMUSG00000001583	2.27864	3.77105	0.786238	0.208493	-2.26193	0.0840278	1
ENSMUSG00000043987	1056.25	988.62	1123.88	1.13682	0.185005	0.0841446	1
ENSMUSG00000053004	222.016	241.165	202.867	0.841198	-0.249483	0.0843792	1
ENSMUSG00000036606	1849.42	1720.79	1978.04	1.14949	0.200996	0.0847872	1
ENSMUSG00000021998	466.009	509.777	422.241	0.828285	-0.271801	0.0850852	1
ENSMUSG00000037624	384.354	355.723	412.986	1.16097	0.215336	0.0853979	1
ENSMUSG00000022512	41.0944	22.4259	59.7629	2.6649	1.41408	0.0855276	1
ENSMUSG00000050600	83.4956	73.3733	93.618	1.27591	0.351531	0.0856786	1
ENSMUSG00000021127	311.036	335.167	286.905	0.856006	-0.224307	0.0857825	1
ENSMUSG00000037129	1.01198	2.02397	0	0	-Inf	0.0859433	1
ENSMUSG00000006717	827.381	881.757	773.006	0.876666	-0.189902	0.0860404	1
ENSMUSG00000031250	16.7639	20.926	12.6017	0.602205	-0.731672	0.0860802	1
ENSMUSG00000022370	598.975	639.687	558.262	0.87271	-0.196425	0.0865696	1
ENSMUSG00000030605	741.655	692.065	791.245	1.14331	0.193218	0.086583	1
ENSMUSG00000031879	293.897	317.087	270.708	0.853734	-0.228141	0.0866598	1
ENSMUSG00000017734	1879.67	2046.97	1712.36	0.836534	-0.257504	0.0868544	1
ENSMUSG00000007944	313.298	283.187	343.409	1.21266	0.278175	0.0870415	1
ENSMUSG00000049134	61.0684	52.5105	69.6264	1.32595	0.407028	0.0872615	1
ENSMUSG00000015957	37.3221	43.7091	30.9351	0.70775	-0.498688	0.0872872	1
ENSMUSG00000022494	473.093	435.546	510.641	1.17242	0.229485	0.0873834	1
ENSMUSG00000020003	420.955	455.694	386.216	0.847534	-0.238656	0.0874933	1
ENSMUSG00000026566	438.31	473.05	403.569	0.85312	-0.229179	0.0876841	1
ENSMUSG00000036503	1627.42	1727.51	1527.34	0.884129	-0.177671	0.0880223	1
ENSMUSG00000062078	2836.3	2998.53	2674.06	0.891789	-0.165226	0.08823	1
ENSMUSG00000021032	241.238	218.932	263.543	1.20377	0.267555	0.0882773	1
ENSMUSG00000031590	355.134	381.787	328.481	0.860377	-0.216959	0.0883418	1
ENSMUSG00000075588	248.277	227.699	268.854	1.18074	0.239695	0.0884546	1
ENSMUSG00000030521	218.275	240.63	195.921	0.814198	-0.296548	0.0885651	1
ENSMUSG00000000142	403.148	373.489	432.808	1.15882	0.212662	0.088625	1
ENSMUSG00000056972	312.827	289.349	336.305	1.16228	0.21696	0.0886859	1
ENSMUSG00000029203	873.027	928.936	817.117	0.879627	-0.185037	0.0887982	1
ENSMUSG00000099032	4.51702	6.83955	2.19449	0.320853	-1.64002	0.0889212	1
ENSMUSG00000049950	102.221	113.552	90.89	0.800426	-0.32116	0.0889557	1
ENSMUSG00000038034	2793.03	2624.5	2961.56	1.12842	0.17431	0.089018	1
ENSMUSG00000084786	1820.18	1928.06	1712.31	0.888102	-0.171203	0.0892751	1
ENSMUSG00000051095	68.0638	77.0932	59.0343	0.765753	-0.385049	0.0894752	1
ENSMUSG00000024957	155.428	140.782	170.074	1.20807	0.272701	0.0894781	1
ENSMUSG00000021660	2150.93	2277.23	2024.63	0.889075	-0.169623	0.0895752	1
ENSMUSG00000062778	19.7396	15.2455	24.2337	1.58956	0.668631	0.0897281	1
ENSMUSG00000079017	52.1677	60.7863	43.5491	0.71643	-0.481102	0.0903579	1
ENSMUSG00000033949	408.493	446.095	370.89	0.831415	-0.266359	0.0903625	1
ENSMUSG00000043029	54.1989	61.9324	46.4655	0.750262	-0.414533	0.0905731	1
ENSMUSG00000025810	403.175	374.326	432.024	1.15414	0.206816	0.0905742	1
ENSMUSG00000032346	9.25694	5.84186	12.672	2.16917	1.11715	0.0906737	1
ENSMUSG00000101174	120.068	107.478	132.658	1.23427	0.303661	0.090828	1
ENSMUSG00000040181	92.9237	103.611	82.2367	0.793708	-0.333319	0.0908553	1
ENSMUSG00000005716	3987.67	4234.53	3740.8	0.883404	-0.178855	0.0908671	1
ENSMUSG00000019278	8.59426	3.61554	13.573	3.75407	1.90845	0.0908784	1
ENSMUSG00000032128	106.462	89.2195	123.704	1.38651	0.471456	0.0910343	1
ENSMUSG00000025020	1440.57	1352.41	1528.72	1.13037	0.176795	0.0910524	1
ENSMUSG00000004891	317.685	341.984	293.385	0.857892	-0.221131	0.091407	1
ENSMUSG00000075602	572.552	622.522	522.581	0.839458	-0.25247	0.091477	1
ENSMUSG00000027230	32.7662	24.7379	40.7946	1.64907	0.721655	0.0914813	1
ENSMUSG00000090083	53.1105	60.6505	45.5706	0.751364	-0.412415	0.091508	1
ENSMUSG00000035898	124.043	141.404	106.683	0.754454	-0.406494	0.091666	1
ENSMUSG00000030087	714.951	638.213	791.689	1.24048	0.310895	0.0918368	1
ENSMUSG00000026482	1713.63	1612.73	1814.53	1.12513	0.170088	0.0919963	1
ENSMUSG00000021411	110.457	98.5204	122.395	1.24233	0.313044	0.0922209	1
ENSMUSG00000025407	255.056	230.643	279.468	1.21169	0.277022	0.0922528	1
ENSMUSG00000049709	2.59139	0.988504	4.19427	4.24305	2.0851	0.0923773	1
ENSMUSG00000021763	108.66	84.3475	132.972	1.57647	0.656702	0.0925519	1
ENSMUSG00000102543	218.27	199.946	236.595	1.18329	0.242808	0.0928752	1
ENSMUSG00000021790	2.58008	1.00748	4.15269	4.12187	2.0433	0.092885	1
ENSMUSG00000056148	3.09771	4.81079	1.38463	0.287817	-1.79677	0.0929293	1
ENSMUSG00000020475	7.87161	10.6142	5.12899	0.483218	-1.04925	0.092953	1
ENSMUSG00000022371	43.2478	34.8848	51.6109	1.47947	0.565077	0.0930979	1
ENSMUSG00000032174	104.384	92.9153	115.853	1.24687	0.318311	0.0931471	1
ENSMUSG00000002326	378.727	406.426	351.027	0.863692	-0.211412	0.0931991	1
ENSMUSG00000028463	15.2559	20.5544	9.95729	0.484436	-1.04562	0.0933927	1
ENSMUSG00000068299	317.347	341.668	293.027	0.857637	-0.221561	0.0934266	1
ENSMUSG00000045875	277.172	255.459	298.886	1.16999	0.226501	0.0936567	1
ENSMUSG00000035683	2.2676	0.802629	3.73257	4.65043	2.21736	0.0937342	1
ENSMUSG00000031778	5043.35	4762.9	5323.8	1.11776	0.160617	0.0938914	1
ENSMUSG00000020707	119.341	131.552	107.13	0.81436	-0.296262	0.0940383	1
ENSMUSG00000073423	368.737	341.981	395.493	1.15648	0.209737	0.0940476	1
ENSMUSG00000000690	713.438	580.682	846.193	1.45724	0.543238	0.0944301	1
ENSMUSG00000056966	1651.89	1750.06	1553.73	0.887819	-0.171662	0.0944569	1
ENSMUSG00000030583	1529.12	1438.63	1619.61	1.1258	0.170953	0.0944618	1
ENSMUSG00000024293	61.0618	72.8996	49.224	0.67523	-0.56655	0.094468	1
ENSMUSG00000000693	116.715	104.544	128.886	1.23284	0.301986	0.09468	1
ENSMUSG00000021996	950.008	1009.63	890.383	0.881887	-0.181333	0.0947464	1
ENSMUSG00000015671	2066.97	2187.89	1946.05	0.889467	-0.168987	0.0947888	1
ENSMUSG00000000958	29.5552	35.0566	24.0539	0.686144	-0.543416	0.094817	1
ENSMUSG00000031139	171.662	188.52	154.805	0.821157	-0.284269	0.0948827	1
ENSMUSG00000053289	211.989	239.602	184.375	0.769503	-0.378001	0.0949462	1
ENSMUSG00000033808	387.355	429.568	345.143	0.803465	-0.315694	0.0949764	1
ENSMUSG00000087408	717.638	671.08	764.196	1.13875	0.187457	0.094991	1
ENSMUSG00000039081	277.91	300.943	254.877	0.846929	-0.239687	0.0951776	1
ENSMUSG00000055200	65.1626	74.0995	56.2257	0.758786	-0.398235	0.0953846	1
ENSMUSG00000029641	31.2888	25.333	37.2447	1.4702	0.556013	0.0955183	1
ENSMUSG00000033688	4.49937	2.40628	6.59247	2.73969	1.45401	0.095665	1
ENSMUSG00000019726	987.821	928.144	1047.5	1.12859	0.174526	0.0956714	1
ENSMUSG00000030789	6.90627	9.43817	4.37437	0.463477	-1.10943	0.0961421	1
ENSMUSG00000033186	707.206	753.991	660.421	0.8759	-0.191162	0.0962504	1
ENSMUSG00000020321	20808.7	21937.8	19679.7	0.89707	-0.156708	0.0966116	1
ENSMUSG00000000399	2709.85	2864.08	2555.62	0.8923	-0.1644	0.0967154	1
ENSMUSG00000001473	44.9807	51.7357	38.2256	0.738864	-0.43662	0.0968392	1
ENSMUSG00000029381	365.952	334.694	397.209	1.18678	0.247058	0.0968592	1
ENSMUSG00000025202	119.451	131.751	107.151	0.813278	-0.298179	0.0969141	1
ENSMUSG00000002885	344.144	369.23	319.059	0.86412	-0.210697	0.0970573	1
ENSMUSG00000081512	1.61473	2.84089	0.388566	0.136776	-2.87011	0.0970661	1
ENSMUSG00000018583	1376.14	1295.01	1457.27	1.1253	0.170303	0.097155	1
ENSMUSG00000049307	29.026	23.6754	34.3765	1.45199	0.538033	0.097237	1
ENSMUSG00000033739	140.686	154.287	127.086	0.823698	-0.279813	0.0973229	1
ENSMUSG00000068551	619.857	579.136	660.579	1.14063	0.189828	0.0973374	1
ENSMUSG00000037857	196.042	213.06	179.024	0.840252	-0.251107	0.0976977	1
ENSMUSG00000040938	381.868	354.987	408.75	1.15145	0.203454	0.0977188	1
ENSMUSG00000052812	212.611	231.228	193.995	0.838974	-0.253303	0.0977772	1
ENSMUSG00000031928	282.325	304.349	260.3	0.855268	-0.225551	0.0978043	1
ENSMUSG00000040599	288.538	312.464	264.611	0.846854	-0.239816	0.0979001	1
ENSMUSG00000000901	80.8771	71.3205	90.4338	1.26799	0.342544	0.0979147	1
ENSMUSG00000038754	0.905521	1.81104	0	0	-Inf	0.098137	1
ENSMUSG00000048379	150.049	165.077	135.021	0.817927	-0.289957	0.0982362	1
ENSMUSG00000035165	1.25576	0.199772	2.31174	11.5719	3.53255	0.0984316	1
ENSMUSG00000037007	156.693	171.164	142.222	0.830911	-0.267234	0.0984416	1
ENSMUSG00000039646	219.855	195.37	244.341	1.25066	0.322687	0.0985441	1
ENSMUSG00000021604	23.2862	28.3612	18.2112	0.642116	-0.639094	0.0986036	1
ENSMUSG00000064345	1126	1236.8	1015.19	0.82082	-0.284862	0.098733	1
ENSMUSG00000052525	14.4858	10.854	18.1175	1.6692	0.73916	0.0988919	1
ENSMUSG00000046805	389.168	434.844	343.492	0.789919	-0.340224	0.0989536	1
ENSMUSG00000048100	477.659	512.183	443.135	0.865189	-0.208913	0.0989746	1
ENSMUSG00000062859	11.5733	14.8302	8.31647	0.560781	-0.834491	0.0992828	1
ENSMUSG00000078427	457.405	503.992	410.818	0.815128	-0.294901	0.0993077	1
ENSMUSG00000027219	3.59928	5.42	1.77856	0.328147	-1.60759	0.0994107	1
ENSMUSG00000039781	871.058	817.974	924.142	1.12979	0.176059	0.0994147	1
ENSMUSG00000003341	55.7291	63.4024	48.0559	0.757951	-0.399824	0.0994335	1
ENSMUSG00000028950	9.4626	12.4743	6.45093	0.517139	-0.951376	0.0995938	1
ENSMUSG00000037845	96.0965	106.717	85.476	0.800959	-0.3202	0.0996319	1
ENSMUSG00000100916	10.8138	6.25101	15.3766	2.45985	1.29857	0.0997884	1
ENSMUSG00000037712	1008.91	1069.69	948.123	0.886351	-0.174051	0.0998706	1
ENSMUSG00000038876	856.253	909.239	803.267	0.883449	-0.178781	0.100015	1
ENSMUSG00000034731	141.855	122.22	161.49	1.32131	0.401969	0.100081	1
ENSMUSG00000020171	311.749	288.571	334.926	1.16063	0.214912	0.100497	1
ENSMUSG00000043463	439.03	469.415	408.645	0.870539	-0.200018	0.100516	1
ENSMUSG00000044501	42.6573	50.0936	35.2211	0.703106	-0.508186	0.100547	1
ENSMUSG00000024869	54.6318	62.1806	47.0829	0.757197	-0.40126	0.100581	1
ENSMUSG00000040651	268.217	298.116	238.318	0.799412	-0.32299	0.10076	1
ENSMUSG00000038116	1574.26	1484.13	1664.4	1.12146	0.165383	0.100813	1
ENSMUSG00000043099	58.605	68.5525	48.6575	0.709785	-0.494547	0.100889	1
ENSMUSG00000050121	667.411	608.4	726.422	1.19399	0.255788	0.100922	1
ENSMUSG00000023571	139.984	122.697	157.271	1.28178	0.35815	0.101067	1
ENSMUSG00000013523	10575.4	11151.4	9999.41	0.896693	-0.157313	0.101133	1
ENSMUSG00000075053	2.27366	0.802361	3.74497	4.66743	2.22263	0.101272	1
ENSMUSG00000071715	23.1556	27.9215	18.3897	0.658621	-0.60248	0.101308	1
ENSMUSG00000026353	1352.77	1432.41	1273.13	0.888802	-0.170065	0.101343	1
ENSMUSG00000108398	1.90428	3.21845	0.590119	0.183355	-2.44729	0.101446	1
ENSMUSG00000032855	6151.36	5820.4	6482.32	1.11372	0.155392	0.101593	1
ENSMUSG00000021302	448.408	479.183	417.633	0.871552	-0.198341	0.101632	1
ENSMUSG00000068134	63.7995	72.0853	55.5138	0.770112	-0.376859	0.101742	1
ENSMUSG00000007655	182.24	197.823	166.658	0.84246	-0.247319	0.101857	1
ENSMUSG00000042507	586.18	540.684	631.677	1.16829	0.224402	0.101869	1
ENSMUSG00000031565	3443.68	3253.52	3633.83	1.11689	0.159486	0.10201	1
ENSMUSG00000031533	424.814	454.562	395.066	0.869116	-0.20238	0.102225	1
ENSMUSG00000020238	1350.79	1271.77	1429.81	1.12427	0.168988	0.102234	1
ENSMUSG00000027188	241.407	217.648	265.165	1.21832	0.284897	0.102298	1
ENSMUSG00000078922	4.20267	1.42341	6.98192	4.90507	2.29427	0.102423	1
ENSMUSG00000022781	609.775	650.228	569.322	0.875573	-0.191701	0.1025	1
ENSMUSG00000032232	2791.34	2633.18	2949.5	1.12013	0.16366	0.10256	1
ENSMUSG00000040841	72.3695	63.6592	81.0798	1.27365	0.348972	0.102688	1
ENSMUSG00000021428	239.488	263.035	215.941	0.82096	-0.284615	0.102696	1
ENSMUSG00000016541	2983.68	3183.92	2783.44	0.874219	-0.193933	0.102763	1
ENSMUSG00000026630	22.637	18.037	27.2371	1.51007	0.594616	0.102874	1
ENSMUSG00000020627	966.832	909.772	1023.89	1.12544	0.170486	0.10296	1
ENSMUSG00000028291	44.0735	50.6717	37.4753	0.73957	-0.435241	0.103155	1
ENSMUSG00000034472	986.2	926.587	1045.81	1.12867	0.174626	0.103381	1
ENSMUSG00000067430	79.0205	88.3182	69.7229	0.789452	-0.341077	0.103442	1
ENSMUSG00000021040	365.072	412.763	317.381	0.768918	-0.379099	0.103492	1
ENSMUSG00000030967	524.733	566.412	483.054	0.852832	-0.229666	0.103643	1
ENSMUSG00000045942	6.47813	4.0292	8.92705	2.21559	1.14769	0.103659	1
ENSMUSG00000039910	294.945	272.989	316.9	1.16085	0.215186	0.103704	1
ENSMUSG00000025980	2635.33	2780.99	2489.67	0.895245	-0.159645	0.103759	1
ENSMUSG00000053553	99.8915	88.599	111.184	1.25491	0.327587	0.10392	1
ENSMUSG00000073973	4.13184	2.20749	6.05619	2.74347	1.456	0.104322	1
ENSMUSG00000033972	84.6208	94.3898	74.8517	0.793007	-0.334595	0.104769	1
ENSMUSG00000059142	84.9177	95.9268	73.9086	0.770469	-0.376192	0.104887	1
ENSMUSG00000020893	1598.04	1457.77	1738.3	1.19243	0.253909	0.105082	1
ENSMUSG00000046567	221.316	241.052	201.58	0.836254	-0.257987	0.105269	1
ENSMUSG00000091387	116.27	104.429	128.112	1.22678	0.294874	0.105416	1
ENSMUSG00000059003	719.797	674.26	765.333	1.13507	0.182782	0.105628	1
ENSMUSG00000012483	75.1767	87.5838	62.7695	0.716679	-0.4806	0.105637	1
ENSMUSG00000048728	165.176	179.829	150.523	0.837036	-0.256638	0.105799	1
ENSMUSG00000031543	9231.07	8635.1	9827.05	1.13804	0.186546	0.106074	1
ENSMUSG00000046096	783.466	832.087	734.845	0.883135	-0.179295	0.106087	1
ENSMUSG00000069206	49.0804	40.9704	57.1904	1.3959	0.481192	0.106115	1
ENSMUSG00000021238	965.482	1023.18	907.784	0.887218	-0.17264	0.106137	1
ENSMUSG00000102312	58.1642	50.352	65.9763	1.3103	0.389898	0.106222	1
ENSMUSG00000015468	308.487	340.434	276.539	0.812314	-0.299891	0.106296	1
ENSMUSG00000031578	277.058	300.722	253.395	0.84262	-0.247045	0.106352	1
ENSMUSG00000071234	492.447	459.758	525.137	1.1422	0.191818	0.106474	1
ENSMUSG00000067369	569.785	607.116	532.455	0.877024	-0.189311	0.106525	1
ENSMUSG00000038244	1682.44	1587.92	1776.95	1.11905	0.162269	0.106546	1
ENSMUSG00000027133	651.478	724.838	578.119	0.797584	-0.326292	0.10677	1
ENSMUSG00000044933	349.132	324.433	373.831	1.15226	0.204466	0.106803	1
ENSMUSG00000018774	104.267	116.35	92.1831	0.792291	-0.335898	0.106849	1
ENSMUSG00000003476	36.8131	22.6361	50.9901	2.2526	1.17159	0.10694	1
ENSMUSG00000020015	643.146	602.98	683.311	1.13322	0.180431	0.107175	1
ENSMUSG00000090461	1.67217	0.205021	3.13932	15.3121	3.9366	0.107199	1
ENSMUSG00000079414	16.7716	12.8891	20.6541	1.60245	0.680278	0.107355	1
ENSMUSG00000041685	245.608	282.392	208.825	0.739489	-0.435399	0.107467	1
ENSMUSG00000036904	70.418	61.8688	78.9672	1.27637	0.352043	0.107718	1
ENSMUSG00000046110	7.18401	4.00967	10.3583	2.58334	1.36924	0.107747	1
ENSMUSG00000017607	10.1841	6.4217	13.9464	2.17176	1.11887	0.107774	1
ENSMUSG00000025582	4401.38	4074.67	4728.08	1.16036	0.214569	0.107777	1
ENSMUSG00000079539	3.89349	2.02463	5.76236	2.84614	1.509	0.107857	1
ENSMUSG00000038990	1485.11	1569.13	1401.08	0.892905	-0.163421	0.107907	1
ENSMUSG00000027845	188.231	168.618	207.845	1.23264	0.301748	0.108105	1
ENSMUSG00000040003	1170.9	1098.03	1243.77	1.13272	0.179795	0.108124	1
ENSMUSG00000036437	78.04	86.9718	69.1082	0.794604	-0.331692	0.108215	1
ENSMUSG00000052837	192.092	207.92	176.264	0.847749	-0.238291	0.108242	1
ENSMUSG00000005628	21.5913	27.3171	15.8655	0.58079	-0.783912	0.108268	1
ENSMUSG00000035890	734.171	688.66	779.682	1.13217	0.179094	0.108337	1
ENSMUSG00000054256	962.369	904.543	1020.2	1.12786	0.173584	0.108505	1
ENSMUSG00000035133	160.871	185.418	136.323	0.735219	-0.443755	0.108681	1
ENSMUSG00000018770	4447.19	4684.15	4210.23	0.898825	-0.153888	0.108849	1
ENSMUSG00000038402	58.9265	66.5876	51.2653	0.769893	-0.37727	0.10914	1
ENSMUSG00000051323	374.345	347.937	400.753	1.1518	0.203887	0.109301	1
ENSMUSG00000038048	115.173	103.96	126.386	1.21572	0.281812	0.109422	1
ENSMUSG00000027881	981.138	1039.65	922.625	0.887438	-0.172282	0.109511	1
ENSMUSG00000040918	479.713	447.974	511.452	1.1417	0.191184	0.109519	1
ENSMUSG00000026994	8.66465	11.4151	5.91417	0.518099	-0.948701	0.109837	1
ENSMUSG00000030559	19.7103	15.2119	24.2086	1.59143	0.670319	0.109888	1
ENSMUSG00000021669	1224.61	1297.91	1151.3	0.887045	-0.172922	0.109911	1
ENSMUSG00000063047	140.74	155.054	126.425	0.815359	-0.294493	0.109968	1
ENSMUSG00000058897	715.17	671.347	758.994	1.13055	0.177029	0.110015	1
ENSMUSG00000040339	395.927	423.145	368.709	0.871355	-0.198668	0.110126	1
ENSMUSG00000036864	103.984	114.595	93.373	0.814806	-0.295472	0.110212	1
ENSMUSG00000031434	78.6569	87.7013	69.6125	0.793745	-0.333253	0.110234	1
ENSMUSG00000055612	31.9742	26.5531	37.3952	1.40832	0.493972	0.110408	1
ENSMUSG00000021798	411.126	383.325	438.928	1.14506	0.195418	0.110668	1
ENSMUSG00000035458	48.608	56.7148	40.5011	0.714118	-0.485765	0.110718	1
ENSMUSG00000071317	27.3168	33.9108	20.7227	0.611095	-0.710532	0.110901	1
ENSMUSG00000053886	6.27241	8.64076	3.90405	0.451818	-1.14619	0.110992	1
ENSMUSG00000069769	3271.12	3505.56	3036.68	0.866245	-0.207153	0.11138	1
ENSMUSG00000005774	953.956	898.12	1009.79	1.12434	0.169078	0.111465	1
ENSMUSG00000026207	1774.51	1676.38	1872.64	1.11708	0.159727	0.11154	1
ENSMUSG00000035246	1820.43	1921.11	1719.76	0.895191	-0.159732	0.111542	1
ENSMUSG00000035762	84.6249	95.3717	73.8782	0.774635	-0.368412	0.111572	1
ENSMUSG00000029165	354.859	330.637	379.081	1.14652	0.197258	0.11199	1
ENSMUSG00000000628	103.004	113.704	92.3032	0.811785	-0.300831	0.112016	1
ENSMUSG00000036585	4626.63	4866.42	4386.85	0.901453	-0.149675	0.112092	1
ENSMUSG00000024647	455.171	425.495	484.848	1.13949	0.188388	0.112187	1
ENSMUSG00000033066	1313.53	1237.71	1389.34	1.12251	0.166727	0.112251	1
ENSMUSG00000015134	27.6768	21.7758	33.5778	1.54198	0.624784	0.112376	1
ENSMUSG00000017466	8625.76	8175.2	9076.32	1.11023	0.150854	0.112413	1
ENSMUSG00000050248	347.057	318.32	375.793	1.18055	0.239461	0.112493	1
ENSMUSG00000066232	721.583	766.175	676.991	0.883599	-0.178536	0.112535	1
ENSMUSG00000074227	238.551	197.616	279.487	1.41429	0.500083	0.112659	1
ENSMUSG00000047454	1402.49	1483.28	1321.71	0.891072	-0.166386	0.112696	1
ENSMUSG00000029153	622.895	661.216	584.573	0.884088	-0.177738	0.112844	1
ENSMUSG00000074272	99.2091	109.729	88.6888	0.808251	-0.307125	0.112896	1
ENSMUSG00000044469	44.9292	38.3675	51.4908	1.34204	0.424429	0.112965	1
ENSMUSG00000052821	4.36722	2.4	6.33444	2.63935	1.40018	0.113051	1
ENSMUSG00000024256	492.732	461.542	523.922	1.13516	0.182889	0.113216	1
ENSMUSG00000078435	22.9945	18.5412	27.4478	1.48037	0.565956	0.113218	1
ENSMUSG00000053025	2903.78	3067.03	2740.53	0.893543	-0.162391	0.113346	1
ENSMUSG00000020838	231.242	315.024	147.461	0.468094	-1.09513	0.113375	1
ENSMUSG00000054723	256.323	236.826	275.82	1.16466	0.219903	0.113498	1
ENSMUSG00000057337	160.239	145.884	174.593	1.19679	0.259167	0.113527	1
ENSMUSG00000009145	38.5105	32.5818	44.4391	1.36393	0.447767	0.11356	1
ENSMUSG00000002017	1201.33	1269.29	1133.37	0.89292	-0.163398	0.113584	1
ENSMUSG00000021067	182.293	200.785	163.802	0.81581	-0.293695	0.113594	1
ENSMUSG00000059796	4192.22	4411.51	3972.93	0.900584	-0.151068	0.113746	1
ENSMUSG00000096370	26.054	30.858	21.25	0.688641	-0.538177	0.113961	1
ENSMUSG00000021534	86.5693	77.2133	95.9252	1.24234	0.313061	0.113993	1
ENSMUSG00000049411	177.956	162.82	193.093	1.18593	0.246016	0.114064	1
ENSMUSG00000073433	1091.34	1154.26	1028.43	0.890987	-0.166525	0.114229	1
ENSMUSG00000050558	51.9477	41.9731	61.9222	1.47528	0.560991	0.11427	1
ENSMUSG00000028464	370.788	396.144	345.432	0.871986	-0.197624	0.114434	1
ENSMUSG00000071392	23.2777	18.6347	27.9207	1.49832	0.583342	0.114605	1
ENSMUSG00000045930	84.555	93.643	75.4669	0.805899	-0.311329	0.114689	1
ENSMUSG00000022360	109.698	120.723	98.6723	0.817345	-0.290982	0.114746	1
ENSMUSG00000006542	18.7639	22.8458	14.682	0.642655	-0.637885	0.114921	1
ENSMUSG00000004032	2495.93	2639.49	2352.38	0.891225	-0.166139	0.115085	1
ENSMUSG00000027253	621.971	575.522	668.419	1.16141	0.215883	0.115141	1
ENSMUSG00000041301	7.7359	10.2988	5.17296	0.502286	-0.99342	0.115397	1
ENSMUSG00000000753	476.302	527.474	425.129	0.805972	-0.311199	0.115736	1
ENSMUSG00000032035	194.472	213.882	175.062	0.818499	-0.288948	0.115743	1
ENSMUSG00000051331	1490.77	1408.08	1573.46	1.11745	0.160207	0.115745	1
ENSMUSG00000047141	75.6277	84.5359	66.7194	0.789244	-0.341457	0.11577	1
ENSMUSG00000007989	112.651	99.5564	125.745	1.26306	0.336918	0.115881	1
ENSMUSG00000064370	2652.23	2893.82	2410.64	0.833031	-0.263557	0.115972	1
ENSMUSG00000049164	19.0133	23.5469	14.4796	0.614925	-0.701519	0.115974	1
ENSMUSG00000026321	75.9695	84.7179	67.221	0.793469	-0.333754	0.116114	1
ENSMUSG00000027296	44.4131	37.8301	50.996	1.34803	0.430848	0.116155	1
ENSMUSG00000027130	975.428	1032	918.852	0.890358	-0.167542	0.116195	1
ENSMUSG00000047420	6.86609	4.42342	9.30877	2.10443	1.07343	0.116227	1
ENSMUSG00000089911	519.204	552.375	486.032	0.879895	-0.184597	0.116577	1
ENSMUSG00000071076	1530.91	1394.51	1667.31	1.19562	0.257761	0.116618	1
ENSMUSG00000043857	1569.61	1444.25	1694.98	1.17361	0.230948	0.11662	1
ENSMUSG00000028333	1074.5	1137.56	1011.45	0.889145	-0.169509	0.116677	1
ENSMUSG00000020720	1225.7	1295.21	1156.19	0.892662	-0.163814	0.116681	1
ENSMUSG00000051669	74.8415	83.3396	66.3435	0.796062	-0.329047	0.117005	1
ENSMUSG00000072672	2.17136	3.57089	0.771837	0.216147	-2.20992	0.117058	1
ENSMUSG00000030750	170.767	185.034	156.5	0.845788	-0.241632	0.117061	1
ENSMUSG00000039395	300.275	321.65	278.9	0.867091	-0.205744	0.117169	1
ENSMUSG00000028434	975.343	919.2	1031.49	1.12216	0.166276	0.11717	1
ENSMUSG00000006219	92.8462	82.9871	102.705	1.2376	0.30755	0.117209	1
ENSMUSG00000037306	641.443	598.902	683.984	1.14206	0.191641	0.11728	1
ENSMUSG00000037262	209.253	227.434	191.072	0.840118	-0.251335	0.1174	1
ENSMUSG00000029576	710.769	668.01	753.527	1.12802	0.17379	0.117402	1
ENSMUSG00000040564	57.3862	68.9283	45.8441	0.665098	-0.588361	0.117432	1
ENSMUSG00000042064	10.4517	13.4854	7.41807	0.550082	-0.862282	0.117451	1
ENSMUSG00000038676	7.01888	10.1425	3.89529	0.384057	-1.38061	0.117763	1
ENSMUSG00000016206	145.855	158.893	132.817	0.83589	-0.258615	0.117769	1
ENSMUSG00000028266	483.563	515.124	452.002	0.877462	-0.188591	0.11782	1
ENSMUSG00000053453	568.764	604.636	532.892	0.881343	-0.182225	0.117972	1
ENSMUSG00000026070	0.805702	1.6114	0	0	-Inf	0.118087	1
ENSMUSG00000027955	38.2655	43.9464	32.5846	0.741464	-0.431551	0.118503	1
ENSMUSG00000062937	465.2	495.786	434.615	0.876618	-0.18998	0.11852	1
ENSMUSG00000037579	52.8329	44.8107	60.8552	1.35805	0.441537	0.11854	1
ENSMUSG00000056999	558.328	596.759	519.898	0.871203	-0.19892	0.118639	1
ENSMUSG00000025144	332.328	356.364	308.292	0.865103	-0.209056	0.118713	1
ENSMUSG00000029658	12.0067	15.1997	8.81359	0.579852	-0.786244	0.118762	1
ENSMUSG00000027459	105.603	94.9891	116.218	1.22349	0.290997	0.118893	1
ENSMUSG00000049299	554.746	602.203	507.288	0.842387	-0.247446	0.11903	1
ENSMUSG00000094622	21.8103	26.5038	17.1169	0.645827	-0.630779	0.119034	1
ENSMUSG00000071064	804.789	757.922	851.657	1.12367	0.168224	0.119084	1
ENSMUSG00000040249	15437.4	14650.3	16224.5	1.10745	0.147246	0.119086	1
ENSMUSG00000068547	0.798706	1.59741	0	0	-Inf	0.119196	1
ENSMUSG00000062014	932.441	986.35	878.533	0.890691	-0.167003	0.119722	1
ENSMUSG00000022747	214.178	230.824	197.531	0.855764	-0.224715	0.119761	1
ENSMUSG00000023140	5.29021	7.43067	3.14975	0.423885	-1.23825	0.120211	1
ENSMUSG00000054517	128.625	116.732	140.518	1.20377	0.267565	0.120232	1
ENSMUSG00000032057	9.72763	6.2215	13.2338	2.1271	1.08889	0.120427	1
ENSMUSG00000032369	56.9565	49.2765	64.6364	1.31171	0.391447	0.120479	1
ENSMUSG00000038546	771	829.029	712.97	0.860006	-0.217582	0.120718	1
ENSMUSG00000032349	1697.35	1788.62	1606.08	0.897947	-0.155297	0.120884	1
ENSMUSG00000095427	4.51145	6.43553	2.58738	0.402047	-1.31457	0.120951	1
ENSMUSG00000001786	838.448	895.035	781.861	0.873553	-0.195033	0.121079	1
ENSMUSG00000045471	2.38579	3.79474	0.976836	0.257418	-1.95781	0.121271	1
ENSMUSG00000001833	2536.7	2701.57	2371.82	0.87794	-0.187806	0.121433	1
ENSMUSG00000074505	975.561	920.286	1030.84	1.12013	0.163661	0.121532	1
ENSMUSG00000031883	332.543	355.287	309.8	0.87197	-0.19765	0.121946	1
ENSMUSG00000025762	292.622	313.715	271.53	0.865531	-0.208343	0.121984	1
ENSMUSG00000028643	159.963	146.32	173.606	1.18648	0.246684	0.12199	1
ENSMUSG00000029866	1.52182	2.63781	0.405831	0.153852	-2.70039	0.122003	1
ENSMUSG00000096822	2.14517	0.6072	3.68314	6.06578	2.60069	0.122166	1
ENSMUSG00000027274	434.7	469.93	399.47	0.850064	-0.234357	0.12228	1
ENSMUSG00000020368	5841.49	6138.8	5544.17	0.903136	-0.146985	0.12228	1
ENSMUSG00000040373	293.84	272.88	314.801	1.15362	0.20617	0.122541	1
ENSMUSG00000026234	4283.19	4508.73	4057.65	0.899954	-0.152077	0.122729	1
ENSMUSG00000035459	21.8452	26.184	17.5063	0.668587	-0.580812	0.122826	1
ENSMUSG00000037446	1.18968	0.205021	2.17434	10.6054	3.40673	0.123078	1
ENSMUSG00000038949	1094.07	1032.38	1155.76	1.11951	0.162864	0.123079	1
ENSMUSG00000031530	141.917	154.363	129.471	0.83874	-0.253704	0.123119	1
ENSMUSG00000035228	486.694	455.976	517.412	1.13474	0.182356	0.123184	1
ENSMUSG00000024516	1620.53	1706.75	1534.3	0.898959	-0.153673	0.123346	1
ENSMUSG00000020014	65.7277	53.75	77.7054	1.44568	0.531749	0.123449	1
ENSMUSG00000066382	1.50456	2.60155	0.407567	0.156663	-2.67426	0.123466	1
ENSMUSG00000063600	74.9373	83.7537	66.1209	0.789468	-0.341047	0.123513	1
ENSMUSG00000036492	11.9545	8.83469	15.0742	1.70626	0.770834	0.123523	1
ENSMUSG00000025283	780.267	825.74	734.794	0.889861	-0.168349	0.123649	1
ENSMUSG00000004113	2474.89	2346.73	2603.05	1.10922	0.149549	0.12372	1
ENSMUSG00000030102	2563.16	2353.4	2772.93	1.17827	0.236669	0.12372	1
ENSMUSG00000045440	6.99376	4.58004	9.40747	2.05402	1.03845	0.123727	1
ENSMUSG00000023984	1.18323	0.201108	2.16535	10.7671	3.42855	0.123812	1
ENSMUSG00000043165	101.691	89.3432	114.039	1.27641	0.352092	0.124135	1
ENSMUSG00000049620	2.10146	3.40494	0.797982	0.23436	-2.0932	0.124145	1
ENSMUSG00000040502	252.663	233.801	271.526	1.16136	0.215814	0.124295	1
ENSMUSG00000031626	871.76	822.683	920.837	1.11931	0.162609	0.124351	1
ENSMUSG00000031730	384.319	356.925	411.714	1.1535	0.20602	0.124397	1
ENSMUSG00000054008	2419.9	2280.52	2559.28	1.12223	0.166373	0.124428	1
ENSMUSG00000025468	1691.59	1600.47	1782.71	1.11387	0.15558	0.124703	1
ENSMUSG00000029388	456.103	485.364	426.843	0.879429	-0.185361	0.124765	1
ENSMUSG00000061536	788.417	742.142	834.693	1.12471	0.169551	0.124777	1
ENSMUSG00000103585	75.3981	66.7783	84.018	1.25816	0.331319	0.124777	1
ENSMUSG00000028885	55.2209	47.993	62.4489	1.30121	0.37985	0.124822	1
ENSMUSG00000054099	92.2293	101.906	82.5522	0.810079	-0.303866	0.124824	1
ENSMUSG00000048191	1.81556	3.03201	0.599112	0.197596	-2.33938	0.124831	1
ENSMUSG00000050471	226.384	243.747	209.021	0.857531	-0.22174	0.124848	1
ENSMUSG00000031370	678.343	719.084	637.602	0.886685	-0.173506	0.125085	1
ENSMUSG00000087303	0.798871	0	1.59774	Inf	Inf	0.125194	1
ENSMUSG00000029632	6365.75	6688.7	6042.8	0.903433	-0.146511	0.125197	1
ENSMUSG00000032586	185.446	165.056	205.837	1.24707	0.318543	0.125325	1
ENSMUSG00000048445	212.833	196.099	229.567	1.17067	0.227332	0.125623	1
ENSMUSG00000029649	2225.4	2351.95	2098.85	0.892389	-0.164255	0.125686	1
ENSMUSG00000044827	6.01124	3.81704	8.20544	2.14969	1.10413	0.125856	1
ENSMUSG00000051998	9.47723	12.3117	6.64277	0.53955	-0.890172	0.125908	1
ENSMUSG00000049038	133.264	148.253	118.275	0.797791	-0.325917	0.125954	1
ENSMUSG00000060594	106.7	117.024	96.3765	0.823559	-0.280055	0.126126	1
ENSMUSG00000042804	1021.38	935.654	1107.1	1.18324	0.242742	0.126139	1
ENSMUSG00000073876	1.79688	2.99813	0.595641	0.198671	-2.33155	0.126165	1
ENSMUSG00000062931	203.429	222.436	184.423	0.829106	-0.270371	0.126355	1
ENSMUSG00000024968	196.647	211.928	181.367	0.855796	-0.224662	0.126587	1
ENSMUSG00000060913	1.79052	2.99451	0.586534	0.19587	-2.35203	0.126626	1
ENSMUSG00000039929	317.733	296.125	339.341	1.14594	0.196527	0.126893	1
ENSMUSG00000026484	123.131	111.765	134.498	1.2034	0.267111	0.127078	1
ENSMUSG00000090236	11.4581	8.42711	14.4892	1.71935	0.781865	0.127102	1
ENSMUSG00000029361	2148.03	2032.57	2263.5	1.11361	0.155244	0.127154	1
ENSMUSG00000026678	1213.18	1322.05	1104.32	0.83531	-0.259616	0.1274	1
ENSMUSG00000028310	3.73689	2.01594	5.45785	2.70735	1.43688	0.12741	1
ENSMUSG00000028883	183.019	201.974	164.065	0.812307	-0.299903	0.127446	1
ENSMUSG00000026814	590.288	625.208	555.368	0.888293	-0.170893	0.127524	1
ENSMUSG00000028164	321.463	343.897	299.029	0.869531	-0.201691	0.127553	1
ENSMUSG00000037638	60.8723	53.4911	68.2535	1.27598	0.351603	0.127602	1
ENSMUSG00000024544	431.705	404.155	459.256	1.13634	0.184391	0.127755	1
ENSMUSG00000042096	382.867	338.964	426.77	1.25904	0.332325	0.127775	1
ENSMUSG00000031780	9.77598	13.4707	6.08126	0.451443	-1.14738	0.127856	1
ENSMUSG00000019146	2532.49	2717.89	2347.09	0.863571	-0.211614	0.128008	1
ENSMUSG00000029617	587.17	622.374	551.966	0.886872	-0.173202	0.128041	1
ENSMUSG00000027500	7293.85	7660.76	6926.94	0.904211	-0.145269	0.128206	1
ENSMUSG00000005510	1984.77	2088.74	1880.81	0.900453	-0.151276	0.128233	1
ENSMUSG00000043719	34.3635	28.5913	40.1357	1.40377	0.489308	0.128267	1
ENSMUSG00000017446	131.048	119.031	143.065	1.20192	0.265337	0.128338	1
ENSMUSG00000078772	3.68715	5.44564	1.92865	0.354165	-1.49751	0.12847	1
ENSMUSG00000023484	859.09	956.808	761.372	0.795742	-0.329628	0.128547	1
ENSMUSG00000031385	3249.28	3414.31	3084.25	0.903331	-0.146674	0.128741	1
ENSMUSG00000038301	849.474	921.5	777.449	0.843678	-0.245235	0.128878	1
ENSMUSG00000000325	950.12	896.61	1003.63	1.11936	0.162676	0.128934	1
ENSMUSG00000014030	25.7832	21.0931	30.4733	1.4447	0.530774	0.12895	1
ENSMUSG00000048546	583.867	521.551	646.182	1.23896	0.309132	0.12897	1
ENSMUSG00000003477	26.3809	17.0877	35.6742	2.08772	1.06192	0.129067	1
ENSMUSG00000025317	13.7749	10.5123	17.0374	1.62071	0.696623	0.129183	1
ENSMUSG00000035429	46.6021	40.2403	52.9638	1.31619	0.396368	0.129316	1
ENSMUSG00000025429	214.806	231.271	198.341	0.857615	-0.221598	0.129455	1
ENSMUSG00000109771	3.65274	5.38582	1.91966	0.356429	-1.48831	0.129661	1
ENSMUSG00000031738	11.0451	8.02665	14.0636	1.75211	0.809095	0.129701	1
ENSMUSG00000051579	403.776	429.812	377.74	0.87885	-0.186312	0.129761	1
ENSMUSG00000027236	375.689	400.746	350.631	0.874945	-0.192736	0.129807	1
ENSMUSG00000006204	6.92532	4.37046	9.48018	2.16915	1.11713	0.129812	1
ENSMUSG00000075232	624.571	670.031	579.111	0.864304	-0.210389	0.129949	1
ENSMUSG00000049184	156.364	173.304	139.423	0.804499	-0.313837	0.130038	1
ENSMUSG00000060802	1727.29	1926.59	1528	0.79311	-0.334406	0.130142	1
ENSMUSG00000060212	2246.39	2129.53	2363.24	1.10975	0.15023	0.130184	1
ENSMUSG00000034467	33.1156	27.3949	38.8363	1.41765	0.503499	0.130241	1
ENSMUSG00000029178	446.648	474.562	418.734	0.882358	-0.180564	0.13028	1
ENSMUSG00000025519	0.893461	0	1.78692	Inf	Inf	0.130309	1
ENSMUSG00000095224	42.2396	36.388	48.0912	1.32162	0.402309	0.130334	1
ENSMUSG00000026893	146.533	159.245	133.821	0.840351	-0.250937	0.13036	1
ENSMUSG00000011171	92.4219	107.592	77.2522	0.718014	-0.477916	0.130382	1
ENSMUSG00000044934	280.944	261.14	300.747	1.15167	0.203728	0.130491	1
ENSMUSG00000050043	3058.95	3257.66	2860.24	0.878003	-0.187702	0.130643	1
ENSMUSG00000078193	2.9083	4.41668	1.39993	0.316965	-1.6576	0.130654	1
ENSMUSG00000064294	15.1478	10.8819	19.4138	1.78404	0.835147	0.130777	1
ENSMUSG00000037139	9.18088	6.458	11.9038	1.84326	0.88226	0.130849	1
ENSMUSG00000031429	367.729	392.383	343.075	0.874336	-0.19374	0.13103	1
ENSMUSG00000068798	370.227	394.753	345.7	0.875736	-0.191431	0.131039	1
ENSMUSG00000000600	496.885	549.025	444.746	0.810065	-0.30389	0.131174	1
ENSMUSG00000042308	717.746	676.851	758.642	1.12084	0.164582	0.131602	1
ENSMUSG00000034591	366.735	391.091	342.379	0.875447	-0.191909	0.131653	1
ENSMUSG00000066357	6079.2	5715.25	6443.14	1.12736	0.172946	0.131692	1
ENSMUSG00000060890	2.58565	0.604565	4.56673	7.55374	2.91719	0.131836	1
ENSMUSG00000042613	2360.65	2236.39	2484.92	1.11113	0.152029	0.131923	1
ENSMUSG00000020007	16.2263	12.6472	19.8054	1.566	0.647082	0.131963	1
ENSMUSG00000027479	1387.1	1460.42	1313.78	0.899593	-0.152655	0.132002	1
ENSMUSG00000002100	42.677	52.9818	32.3723	0.611007	-0.710739	0.132032	1
ENSMUSG00000022435	2.41195	1.00003	3.82388	3.82375	1.93499	0.132432	1
ENSMUSG00000042372	13.1117	16.3594	9.86393	0.602952	-0.729885	0.132607	1
ENSMUSG00000051243	59.8146	51.332	68.2972	1.3305	0.411969	0.13265	1
ENSMUSG00000045333	680.565	640.218	720.912	1.12604	0.17126	0.132797	1
ENSMUSG00000027350	8020.18	7627.2	8413.15	1.10305	0.141493	0.132826	1
ENSMUSG00000051703	438.406	410.471	466.341	1.13611	0.184107	0.133021	1
ENSMUSG00000002910	822.546	683.249	961.842	1.40775	0.493388	0.133123	1
ENSMUSG00000046794	30.1198	22.0034	38.2362	1.73774	0.797213	0.133151	1
ENSMUSG00000031478	55.2462	62.0706	48.4217	0.780108	-0.358255	0.133315	1
ENSMUSG00000036620	608.955	572.314	645.595	1.12804	0.173821	0.133696	1
ENSMUSG00000062545	11.5297	14.4916	8.56774	0.591221	-0.75823	0.133699	1
ENSMUSG00000022323	1087.51	1170.17	1004.85	0.858716	-0.219747	0.134046	1
ENSMUSG00000022246	117.311	106.388	128.234	1.20533	0.269434	0.134199	1
ENSMUSG00000003134	412.367	386.44	438.294	1.13418	0.181652	0.134223	1
ENSMUSG00000016128	553.204	520.334	586.074	1.12634	0.171643	0.134322	1
ENSMUSG00000060579	76.2694	84.6666	67.8722	0.80164	-0.318974	0.134395	1
ENSMUSG00000046338	11.8764	8.85561	14.8972	1.68223	0.750377	0.134403	1
ENSMUSG00000028559	1819.28	1946.69	1691.87	0.869101	-0.202404	0.134414	1
ENSMUSG00000054874	1954.35	1853.7	2055.01	1.1086	0.148741	0.134668	1
ENSMUSG00000041075	167.113	152.306	181.92	1.19443	0.256326	0.134859	1
ENSMUSG00000000942	182.695	165.694	199.696	1.20521	0.269284	0.135006	1
ENSMUSG00000053347	102.155	114.622	89.6874	0.78246	-0.353911	0.135011	1
ENSMUSG00000071847	396.765	438.972	354.559	0.807703	-0.308103	0.135076	1
ENSMUSG00000042810	1825.36	1731.1	1919.61	1.1089	0.149128	0.135108	1
ENSMUSG00000072845	5.56588	1.19863	9.93313	8.28706	3.05086	0.135287	1
ENSMUSG00000059956	0.819213	0	1.63843	Inf	Inf	0.135309	1
ENSMUSG00000032352	285.359	305.25	265.468	0.869673	-0.201455	0.135341	1
ENSMUSG00000090317	2.35956	1.00808	3.71104	3.6813	1.88022	0.135518	1
ENSMUSG00000047735	8.44656	11.0143	5.87885	0.533748	-0.905768	0.135554	1
ENSMUSG00000031196	7.7293	10.1816	5.27705	0.518295	-0.948154	0.135616	1
ENSMUSG00000039849	1321.85	1242.76	1400.93	1.12727	0.172839	0.135658	1
ENSMUSG00000032812	599.95	564.407	635.492	1.12595	0.171138	0.135664	1
ENSMUSG00000039239	173.253	153.351	193.154	1.25956	0.332916	0.135671	1
ENSMUSG00000031723	235.187	252.64	217.734	0.861835	-0.214517	0.135783	1
ENSMUSG00000027018	142.219	157.214	127.223	0.809233	-0.305372	0.1358	1
ENSMUSG00000079523	147.535	135.176	159.895	1.18286	0.242278	0.135888	1
ENSMUSG00000029651	1220.97	1156.1	1285.84	1.11222	0.153441	0.135966	1
ENSMUSG00000035504	77.2688	68.9214	85.6162	1.24223	0.312933	0.136033	1
ENSMUSG00000028788	1377.05	1462.64	1291.47	0.882972	-0.179561	0.136295	1
ENSMUSG00000048647	64.7159	72.0755	57.3562	0.79578	-0.329558	0.136662	1
ENSMUSG00000034159	1.39275	0.199772	2.58574	12.9434	3.69415	0.136681	1
ENSMUSG00000071984	142.987	128.204	157.769	1.23061	0.299371	0.136794	1
ENSMUSG00000010608	1381.7	1505.56	1257.85	0.835473	-0.259334	0.137121	1
ENSMUSG00000020411	360	388.442	331.558	0.853559	-0.228436	0.137218	1
ENSMUSG00000060780	411.827	385.787	437.866	1.13499	0.182684	0.137353	1
ENSMUSG00000024112	1108.52	1023.97	1193.07	1.16514	0.220509	0.137379	1
ENSMUSG00000036053	701.882	751.585	652.179	0.867739	-0.204667	0.137607	1
ENSMUSG00000027712	2737.28	2873.18	2601.37	0.905399	-0.143375	0.137798	1
ENSMUSG00000031932	244.822	224.159	265.485	1.18436	0.244106	0.137822	1
ENSMUSG00000028676	323.724	345.62	301.828	0.873294	-0.195461	0.138093	1
ENSMUSG00000078851	74.1667	82.5143	65.8191	0.797669	-0.326137	0.138148	1
ENSMUSG00000027397	3351.74	3520.56	3182.92	0.904096	-0.145452	0.138168	1
ENSMUSG00000026969	2.07005	0.814159	3.32595	4.08514	2.03038	0.138187	1
ENSMUSG00000046667	90.3812	102.261	78.5015	0.767659	-0.381462	0.13822	1
ENSMUSG00000021456	1.78157	0.600652	2.96249	4.93213	2.30221	0.138356	1
ENSMUSG00000008575	602.501	651.477	553.526	0.849648	-0.235063	0.138365	1
ENSMUSG00000020122	214.363	230.441	198.285	0.86046	-0.21682	0.138441	1
ENSMUSG00000021175	32.5097	37.6146	27.4047	0.728567	-0.456867	0.138453	1
ENSMUSG00000069833	1098.28	1161.67	1034.89	0.890865	-0.166722	0.138617	1
ENSMUSG00000024979	2.06361	0.801331	3.32588	4.15045	2.05327	0.138634	1
ENSMUSG00000049641	1.77771	0.611113	2.9443	4.81793	2.26841	0.138667	1
ENSMUSG00000039377	14.3498	17.6361	11.0635	0.627321	-0.672725	0.138785	1
ENSMUSG00000036617	1698.05	1609.18	1786.91	1.11044	0.151135	0.138984	1
ENSMUSG00000047371	328.169	306.327	350.011	1.14261	0.192328	0.139147	1
ENSMUSG00000068922	576.259	542.035	610.483	1.12628	0.171565	0.139267	1
ENSMUSG00000070720	50.5253	56.8498	44.2008	0.777501	-0.363083	0.139394	1
ENSMUSG00000037692	1026.22	955.97	1096.47	1.14698	0.197835	0.139512	1
ENSMUSG00000036353	186.132	201.666	170.597	0.845939	-0.241375	0.139553	1
ENSMUSG00000026249	4049.13	4245.27	3852.98	0.907594	-0.139881	0.139731	1
ENSMUSG00000026274	135.722	124.068	147.376	1.18787	0.248376	0.139749	1
ENSMUSG00000021189	331.437	354.916	307.958	0.867693	-0.204743	0.140227	1
ENSMUSG00000021361	658.846	696.843	620.849	0.890945	-0.166592	0.140293	1
ENSMUSG00000042978	1396.52	1322.25	1470.78	1.11233	0.15359	0.140358	1
ENSMUSG00000031201	277.681	306.844	248.518	0.809915	-0.304158	0.140391	1
ENSMUSG00000036427	14570.5	15261.6	13879.5	0.909435	-0.136958	0.140423	1
ENSMUSG00000039851	38.6639	32.3652	44.9626	1.38923	0.474284	0.140449	1
ENSMUSG00000063681	22.4322	28.5311	16.3333	0.572475	-0.804715	0.140451	1
ENSMUSG00000002109	281.834	301.349	262.318	0.870477	-0.200122	0.140459	1
ENSMUSG00000037086	25.9424	9.19088	42.694	4.64525	2.21576	0.140526	1
ENSMUSG00000069227	686.563	647.4	725.726	1.12098	0.164766	0.140583	1
ENSMUSG00000019102	39.0373	50.079	27.9956	0.559028	-0.839008	0.140656	1
ENSMUSG00000006411	427.848	401.268	454.427	1.13248	0.179483	0.140662	1
ENSMUSG00000025422	3829.97	3643.57	4016.36	1.10232	0.140537	0.140771	1
ENSMUSG00000046008	4.74915	2.41583	7.08248	2.9317	1.55174	0.140884	1
ENSMUSG00000070564	12.9298	9.78677	16.0728	1.6423	0.715717	0.141531	1
ENSMUSG00000035364	4.43083	2.60479	6.25686	2.40206	1.26427	0.14174	1
ENSMUSG00000028126	527.856	495.967	559.745	1.12859	0.174526	0.141768	1
ENSMUSG00000013584	100.066	82.1004	118.032	1.43765	0.523716	0.14205	1
ENSMUSG00000015053	143.632	158.884	128.379	0.808005	-0.307564	0.142113	1
ENSMUSG00000006464	869.395	821.089	917.701	1.11766	0.160486	0.142129	1
ENSMUSG00000015852	103.463	73.1865	133.739	1.82737	0.869772	0.14219	1
ENSMUSG00000079227	19.5943	23.4286	15.7601	0.672686	-0.571995	0.142299	1
ENSMUSG00000098176	128.307	116.895	139.718	1.19525	0.25731	0.142384	1
ENSMUSG00000006143	10.2016	13.0213	7.38186	0.566908	-0.818815	0.14242	1
ENSMUSG00000003469	2416.1	2295.55	2536.66	1.10503	0.144091	0.142509	1
ENSMUSG00000029019	13.9487	10.7549	17.1426	1.59393	0.672587	0.142517	1
ENSMUSG00000003279	1854.15	1758.17	1950.13	1.10918	0.149494	0.143104	1
ENSMUSG00000033253	2447.34	2326.55	2568.13	1.10384	0.14253	0.143127	1
ENSMUSG00000035274	374.702	348.746	400.659	1.14886	0.200199	0.143131	1
ENSMUSG00000041730	283.279	250.613	315.944	1.26069	0.334211	0.143148	1
ENSMUSG00000009569	1582.2	1500.74	1663.66	1.10856	0.148686	0.143181	1
ENSMUSG00000039977	10.8266	7.98721	13.6659	1.71098	0.774821	0.143399	1
ENSMUSG00000048703	1.20369	2.21667	0.190711	0.0860351	-3.53893	0.143539	1
ENSMUSG00000047021	448.86	386.377	511.343	1.32343	0.404283	0.143575	1
ENSMUSG00000048787	195.804	210.417	181.192	0.861112	-0.215727	0.143915	1
ENSMUSG00000028631	534.837	484.613	585.061	1.20727	0.271754	0.144249	1
ENSMUSG00000038893	118.76	129.26	108.261	0.837544	-0.255763	0.144249	1
ENSMUSG00000054404	157.241	173.552	140.931	0.812041	-0.300376	0.144447	1
ENSMUSG00000058248	800.489	756.789	844.19	1.11549	0.157677	0.144539	1
ENSMUSG00000024999	281.923	301.163	262.683	0.872227	-0.197224	0.1446	1
ENSMUSG00000068744	10.7012	7.76677	13.6356	1.75564	0.811995	0.14468	1
ENSMUSG00000037020	67.0615	74.547	59.5759	0.799172	-0.323422	0.144762	1
ENSMUSG00000040209	1266.63	1201.62	1331.64	1.1082	0.148214	0.144821	1
ENSMUSG00000096883	150.716	126.595	174.837	1.38108	0.465797	0.144934	1
ENSMUSG00000033174	1656.05	1561.32	1750.78	1.12135	0.165235	0.144955	1
ENSMUSG00000020986	1402.49	1479.9	1325.08	0.895386	-0.159418	0.145015	1
ENSMUSG00000031634	788.69	832.76	744.619	0.894158	-0.161398	0.145028	1
ENSMUSG00000016756	2.30044	3.60773	0.993154	0.275285	-1.861	0.145127	1
ENSMUSG00000055653	127.279	115.899	138.658	1.19637	0.258658	0.145169	1
ENSMUSG00000048602	23.4422	19.2747	27.6098	1.43244	0.518475	0.145387	1
ENSMUSG00000028807	53.6074	47.0424	60.1724	1.27911	0.35514	0.145562	1
ENSMUSG00000032293	251.594	274.679	228.509	0.831914	-0.265494	0.145673	1
ENSMUSG00000039809	3769.48	3587.28	3951.69	1.10158	0.139579	0.145681	1
ENSMUSG00000058498	459.139	487.721	430.557	0.882795	-0.17985	0.145803	1
ENSMUSG00000028436	950.796	1002.23	899.365	0.897366	-0.156231	0.145818	1
ENSMUSG00000042694	203.693	187.371	220.015	1.17422	0.231703	0.146113	1
ENSMUSG00000025255	611.663	562.65	660.675	1.17422	0.231703	0.146207	1
ENSMUSG00000078945	42.752	48.4327	37.0713	0.765418	-0.38568	0.146316	1
ENSMUSG00000020263	2937.04	3081.99	2792.09	0.905937	-0.142518	0.146502	1
ENSMUSG00000030345	12.3947	9.37923	15.4102	1.64302	0.716349	0.146528	1
ENSMUSG00000021591	966.034	1018.99	913.082	0.896068	-0.15832	0.146581	1
ENSMUSG00000058260	24.1309	30.0492	18.2126	0.606092	-0.722391	0.146619	1
ENSMUSG00000107283	334.503	365.786	303.22	0.828953	-0.270637	0.146648	1
ENSMUSG00000039680	205.742	225.142	186.342	0.827662	-0.272886	0.146824	1
ENSMUSG00000043298	254.976	278.605	231.347	0.830376	-0.268163	0.147041	1
ENSMUSG00000071860	7.80639	5.38793	10.2248	1.89773	0.924274	0.14737	1
ENSMUSG00000031637	9.75949	12.4163	7.10265	0.572041	-0.80581	0.14738	1
ENSMUSG00000031756	32.9916	27.9702	38.0129	1.35905	0.442599	0.147385	1
ENSMUSG00000068882	746.363	837.396	655.329	0.782579	-0.353692	0.14759	1
ENSMUSG00000021149	371.177	408.218	334.135	0.818522	-0.288907	0.147628	1
ENSMUSG00000062397	1880.53	1975.14	1785.92	0.904201	-0.145284	0.147666	1
ENSMUSG00000073427	25.6326	21.3084	29.9568	1.40587	0.491463	0.147777	1
ENSMUSG00000069793	6.16605	4.02099	8.31111	2.06693	1.04749	0.147949	1
ENSMUSG00000045608	393.358	364.774	421.942	1.15672	0.210041	0.14814	1
ENSMUSG00000062456	35.6111	40.8385	30.3836	0.743993	-0.426639	0.148168	1
ENSMUSG00000029431	22.7123	18.5621	26.8625	1.44717	0.533236	0.14828	1
ENSMUSG00000021311	255.522	238.183	272.861	1.14559	0.196093	0.148348	1
ENSMUSG00000075012	444.417	413.059	475.775	1.15183	0.203931	0.148513	1
ENSMUSG00000022490	363.959	340.585	387.334	1.13726	0.185565	0.148607	1
ENSMUSG00000006335	515.79	545.697	485.884	0.890392	-0.167488	0.148613	1
ENSMUSG00000028039	781.378	730.949	831.807	1.13798	0.186477	0.148626	1
ENSMUSG00000030549	7.01616	9.22622	4.8061	0.520918	-0.940873	0.148727	1
ENSMUSG00000028687	91.5911	82.8371	100.345	1.21136	0.276622	0.148759	1
ENSMUSG00000075478	1221.17	1157.57	1284.77	1.10989	0.150415	0.14877	1
ENSMUSG00000096257	93.1768	103.113	83.2404	0.807273	-0.308871	0.148819	1
ENSMUSG00000019232	1918.8	2021.68	1815.91	0.898216	-0.154866	0.14907	1
ENSMUSG00000045690	44.3704	38.6139	50.1269	1.29816	0.376465	0.149129	1
ENSMUSG00000037977	370.57	346.471	394.669	1.13911	0.18791	0.149193	1
ENSMUSG00000026483	125.962	136.911	115.013	0.840055	-0.251444	0.149414	1
ENSMUSG00000094634	24.2943	29.0817	19.5069	0.670761	-0.576128	0.149592	1
ENSMUSG00000024395	368.101	391.572	344.63	0.880119	-0.184229	0.14978	1
ENSMUSG00000034845	240.935	222.647	259.224	1.16428	0.219443	0.149781	1
ENSMUSG00000079644	1.28816	0.205021	2.37129	11.5661	3.53183	0.149809	1
ENSMUSG00000004895	777.705	734.735	820.676	1.11697	0.15959	0.149924	1
ENSMUSG00000020484	1206.14	1272.84	1139.44	0.895198	-0.159722	0.149999	1
ENSMUSG00000047417	1107.14	1049.16	1165.12	1.11053	0.151247	0.150023	1
ENSMUSG00000021710	387.222	411.019	363.425	0.884205	-0.177548	0.150027	1
ENSMUSG00000021518	1468.36	1544	1392.73	0.902029	-0.148755	0.15008	1
ENSMUSG00000049739	769.194	726.343	812.046	1.11799	0.160909	0.150118	1
ENSMUSG00000024799	740.191	700.041	780.34	1.11471	0.156663	0.150163	1
ENSMUSG00000038280	903.847	951.938	855.756	0.898962	-0.153668	0.150347	1
ENSMUSG00000021991	1635.68	1735.08	1536.27	0.885415	-0.175575	0.150379	1
ENSMUSG00000032905	622.399	659.409	585.388	0.887747	-0.17178	0.150561	1
ENSMUSG00000033006	1670.23	1765.78	1574.68	0.891779	-0.165242	0.150792	1
ENSMUSG00000022967	762.95	803.901	721.998	0.898119	-0.155021	0.150842	1
ENSMUSG00000029859	24.1439	19.7977	28.4901	1.43906	0.525128	0.150851	1
ENSMUSG00000074063	21.7924	25.7423	17.8426	0.693126	-0.52881	0.150947	1
ENSMUSG00000038543	30.0127	35.1595	24.866	0.707235	-0.499738	0.150968	1
ENSMUSG00000030972	75.7116	67.8725	83.5507	1.231	0.299825	0.151097	1
ENSMUSG00000025946	18.5491	14.8881	22.2101	1.49181	0.577059	0.151102	1
ENSMUSG00000019947	778.185	724.634	831.736	1.1478	0.198873	0.151154	1
ENSMUSG00000038127	739.445	800.05	678.841	0.848498	-0.237017	0.151367	1
ENSMUSG00000044600	1308.18	1375.64	1240.72	0.901924	-0.148923	0.151386	1
ENSMUSG00000072625	4.64667	2.79791	6.49543	2.32152	1.21507	0.151401	1
ENSMUSG00000015536	940.286	996.222	884.351	0.887705	-0.171847	0.151452	1
ENSMUSG00000039745	236.503	252.896	220.11	0.870358	-0.200319	0.151554	1
ENSMUSG00000047495	304.293	284.501	324.085	1.13914	0.18794	0.151565	1
ENSMUSG00000042453	1657.24	1527.19	1787.29	1.17031	0.226889	0.151585	1
ENSMUSG00000070532	224.872	240.87	208.874	0.867166	-0.205619	0.151775	1
ENSMUSG00000028452	7388.53	7738.08	7038.97	0.909653	-0.136612	0.151801	1
ENSMUSG00000064368	479.763	570.885	388.64	0.680768	-0.554765	0.152537	1
ENSMUSG00000019088	50.3018	56.6959	43.9078	0.774445	-0.368766	0.152651	1
ENSMUSG00000025920	1480.24	1567.73	1392.75	0.888384	-0.170745	0.152661	1
ENSMUSG00000040690	2304.21	2446.13	2162.28	0.883957	-0.177952	0.152817	1
ENSMUSG00000031374	97.7935	88.7521	106.835	1.20375	0.267531	0.152987	1
ENSMUSG00000049939	1067.26	1011.23	1123.3	1.11083	0.151639	0.153011	1
ENSMUSG00000043873	1.61464	3.02958	0.199704	0.0659179	-3.92319	0.153403	1
ENSMUSG00000021771	2894.78	3081.65	2707.91	0.878722	-0.186522	0.153529	1
ENSMUSG00000027071	56.4723	49.7891	63.1556	1.26846	0.34308	0.153544	1
ENSMUSG00000015839	339.617	361.261	317.973	0.880177	-0.184135	0.15357	1
ENSMUSG00000040794	692.594	639.968	745.22	1.16446	0.219666	0.153585	1
ENSMUSG00000032715	19.7819	23.5487	16.0152	0.680088	-0.556206	0.153713	1
ENSMUSG00000020077	113.457	123.363	103.551	0.839402	-0.252567	0.153872	1
ENSMUSG00000057469	878.684	926.495	830.873	0.896791	-0.157156	0.153983	1
ENSMUSG00000028165	649.272	685.555	612.99	0.894151	-0.16141	0.15408	1
ENSMUSG00000023004	16151.6	16896.8	15406.4	0.911789	-0.133227	0.154095	1
ENSMUSG00000032575	860.187	905.978	814.395	0.898913	-0.153747	0.154156	1
ENSMUSG00000079304	108.768	98.6016	118.935	1.20621	0.270484	0.154179	1
ENSMUSG00000058126	180.117	276.055	84.1786	0.304934	-1.71343	0.154243	1
ENSMUSG00000062510	19.6752	23.4481	15.9024	0.678193	-0.560231	0.15435	1
ENSMUSG00000016918	490.498	415.735	565.262	1.35967	0.443255	0.154397	1
ENSMUSG00000020261	2119.56	1933.37	2305.75	1.19261	0.254121	0.154424	1
ENSMUSG00000045288	23.3073	27.8417	18.7729	0.674274	-0.568594	0.154495	1
ENSMUSG00000029847	21.7377	17.6737	25.8018	1.45989	0.545863	0.154517	1
ENSMUSG00000046490	1.41215	2.42758	0.396725	0.163424	-2.61331	0.154588	1
ENSMUSG00000035873	13.8073	10.5909	17.0237	1.60738	0.684715	0.154593	1
ENSMUSG00000090698	55.3291	48.8472	61.8109	1.26539	0.339585	0.154615	1
ENSMUSG00000028347	760.979	801.958	720	0.897803	-0.15553	0.15466	1
ENSMUSG00000032702	695.536	657.281	733.792	1.1164	0.15886	0.154819	1
ENSMUSG00000074872	283.023	310.913	255.133	0.820595	-0.285259	0.154901	1
ENSMUSG00000027710	938.534	888.924	988.144	1.11162	0.152661	0.154965	1
ENSMUSG00000053747	7.18105	9.46166	4.90043	0.517926	-0.949183	0.155164	1
ENSMUSG00000041923	381.398	358.019	404.777	1.1306	0.177089	0.155195	1
ENSMUSG00000024827	101.76	92.1505	111.369	1.20855	0.273283	0.155236	1
ENSMUSG00000059741	10.1735	12.8836	7.46349	0.579303	-0.787611	0.155253	1
ENSMUSG00000042909	2.79126	4.18807	1.39446	0.332959	-1.58658	0.155405	1
ENSMUSG00000025002	1.40024	2.42275	0.377724	0.155907	-2.68124	0.155804	1
ENSMUSG00000040140	95.822	86.6395	105.005	1.21197	0.277355	0.155883	1
ENSMUSG00000074028	2.7804	4.19439	1.36642	0.325772	-1.61806	0.155948	1
ENSMUSG00000051022	320.205	340.076	300.334	0.883138	-0.179289	0.156026	1
ENSMUSG00000037660	12.6199	7.39037	17.8495	2.41523	1.27216	0.156155	1
ENSMUSG00000075592	999.85	947.377	1052.32	1.11077	0.151565	0.156178	1
ENSMUSG00000010342	27.1496	33.1553	21.1439	0.637725	-0.648994	0.1562	1
ENSMUSG00000061273	313.919	340.242	287.596	0.845271	-0.242514	0.156242	1
ENSMUSG00000021662	806.266	762.112	850.421	1.11587	0.158175	0.156291	1
ENSMUSG00000024049	58.4095	65.2037	51.6153	0.791601	-0.337155	0.1564	1
ENSMUSG00000029101	717.404	677.508	757.301	1.11777	0.160629	0.156556	1
ENSMUSG00000042826	1477.63	1552	1403.26	0.904162	-0.145346	0.156904	1
ENSMUSG00000042306	1.38898	2.3794	0.398574	0.16751	-2.57768	0.15697	1
ENSMUSG00000025245	339.594	372.1	307.088	0.825282	-0.277041	0.157274	1
ENSMUSG00000032368	1055.08	941.419	1168.74	1.24147	0.312046	0.1573	1
ENSMUSG00000027939	12.7921	15.8062	9.7781	0.618626	-0.692861	0.157721	1
ENSMUSG00000028602	14.9224	18.0581	11.7868	0.652714	-0.615478	0.157811	1
ENSMUSG00000022514	544.197	575.779	512.615	0.890299	-0.167638	0.157936	1
ENSMUSG00000042846	514.012	544.047	483.977	0.889586	-0.168793	0.15796	1
ENSMUSG00000035293	64.1761	71.2348	57.1175	0.801821	-0.318648	0.157998	1
ENSMUSG00000054074	90.6287	81.9704	99.2871	1.21126	0.276503	0.158099	1
ENSMUSG00000095463	1.0924	0.201108	1.98369	9.86383	3.30215	0.158139	1
ENSMUSG00000041482	106.553	97.0941	116.012	1.19484	0.256816	0.158213	1
ENSMUSG00000045538	275.027	293.335	256.72	0.875175	-0.192356	0.158266	1
ENSMUSG00000002500	20.0727	23.8966	16.2488	0.679964	-0.556471	0.158348	1
ENSMUSG00000048310	339.631	318.355	360.907	1.13366	0.180988	0.158431	1
ENSMUSG00000037681	73.3137	65.6934	80.9341	1.232	0.300999	0.158509	1
ENSMUSG00000027804	682.242	720.178	644.306	0.894649	-0.160607	0.158546	1
ENSMUSG00000021366	1484.33	1411	1557.66	1.10393	0.142655	0.158564	1
ENSMUSG00000017491	154.269	142.046	166.492	1.1721	0.229098	0.158594	1
ENSMUSG00000020669	150.975	139.012	162.937	1.17211	0.229107	0.158728	1
ENSMUSG00000024068	357.22	383.021	331.419	0.865276	-0.208768	0.158778	1
ENSMUSG00000018862	5.98007	8.04399	3.91616	0.486842	-1.03847	0.15879	1
ENSMUSG00000100967	91.8637	100.852	82.8752	0.82175	-0.283229	0.158844	1
ENSMUSG00000057715	252.874	272.687	233.061	0.854681	-0.226543	0.158903	1
ENSMUSG00000021824	412.966	445.144	380.789	0.855428	-0.225281	0.158963	1
ENSMUSG00000020297	7122.23	6798.01	7446.46	1.09539	0.131442	0.159182	1
ENSMUSG00000022358	576.443	620.112	532.773	0.859156	-0.219007	0.159269	1
ENSMUSG00000022723	232.736	250.174	215.298	0.860596	-0.216593	0.15932	1
ENSMUSG00000094151	5.95582	8.03062	3.88102	0.483278	-1.04908	0.159334	1
ENSMUSG00000022816	2343.18	2454.23	2232.13	0.909502	-0.136851	0.159347	1
ENSMUSG00000021940	4.3154	6.06683	2.56396	0.42262	-1.24257	0.159461	1
ENSMUSG00000033777	8.12488	10.4415	5.80825	0.556265	-0.846155	0.159594	1
ENSMUSG00000020057	25.0727	29.3081	20.8373	0.710973	-0.492133	0.159696	1
ENSMUSG00000022248	140.999	152.765	129.234	0.845969	-0.241323	0.159817	1
ENSMUSG00000070420	408.246	383.341	433.15	1.12993	0.176238	0.160044	1
ENSMUSG00000018736	1933.11	2025.18	1841.04	0.909077	-0.137525	0.160046	1
ENSMUSG00000034101	103.26	112.663	93.8575	0.83308	-0.263472	0.160084	1
ENSMUSG00000023961	547.56	578.182	516.938	0.894075	-0.161532	0.160143	1
ENSMUSG00000036466	449.158	492.322	405.994	0.824652	-0.278142	0.160238	1
ENSMUSG00000031828	178.617	165.458	191.775	1.15905	0.212942	0.16043	1
ENSMUSG00000025129	1.07586	0.205021	1.94671	9.49515	3.24719	0.160478	1
ENSMUSG00000024014	218.444	233.689	203.198	0.869524	-0.201703	0.160495	1
ENSMUSG00000029755	0.710822	1.42164	0	0	-Inf	0.160581	1
ENSMUSG00000053706	28.2536	23.7678	32.7395	1.37747	0.462024	0.160689	1
ENSMUSG00000021221	222.621	206.976	238.266	1.15118	0.203113	0.160745	1
ENSMUSG00000029781	616.752	581.996	651.508	1.11944	0.162774	0.160753	1
ENSMUSG00000005503	78.4889	70.461	86.5167	1.22787	0.296152	0.160802	1
ENSMUSG00000053654	0.709729	1.41946	0	0	-Inf	0.16081	1
ENSMUSG00000089704	0.70971	1.41942	0	0	-Inf	0.160814	1
ENSMUSG00000006471	1300.14	1234.8	1365.48	1.10583	0.145136	0.160989	1
ENSMUSG00000031483	1379.39	1309.8	1448.98	1.10627	0.145699	0.161073	1
ENSMUSG00000055725	300.849	281.813	319.885	1.1351	0.182819	0.161383	1
ENSMUSG00000038037	9.69011	12.3128	7.06744	0.573992	-0.800897	0.161454	1
ENSMUSG00000032204	33.3582	38.2761	28.4403	0.743031	-0.428505	0.161505	1
ENSMUSG00000046774	0.706417	1.41283	0	0	-Inf	0.161508	1
ENSMUSG00000049791	278.256	242.115	314.396	1.29854	0.376894	0.161559	1
ENSMUSG00000031740	90.499	81.7265	99.2716	1.21468	0.280577	0.161695	1
ENSMUSG00000028048	1046.52	1100.25	992.791	0.902336	-0.148264	0.161773	1
ENSMUSG00000056978	0.705019	1.41004	0	0	-Inf	0.161804	1
ENSMUSG00000041872	0.70437	1.40874	0	0	-Inf	0.161942	1
ENSMUSG00000020483	37218.4	39288.1	35148.6	0.894637	-0.160626	0.162063	1
ENSMUSG00000027942	1076.02	1130.73	1021.3	0.903218	-0.146853	0.16213	1
ENSMUSG00000058669	99.7008	112.31	87.0917	0.775459	-0.366878	0.162177	1
ENSMUSG00000024266	2.88634	4.6176	1.15508	0.250148	-1.99915	0.162179	1
ENSMUSG00000046814	26.9406	34.1482	19.733	0.577864	-0.791198	0.162215	1
ENSMUSG00000090659	15.3164	18.9104	11.7224	0.61989	-0.689915	0.162497	1
ENSMUSG00000025917	1174.69	1233.2	1116.18	0.905108	-0.143838	0.162908	1
ENSMUSG00000048022	1287.34	1351.26	1223.42	0.90539	-0.143389	0.163078	1
ENSMUSG00000060548	598.506	564.46	632.552	1.12063	0.164312	0.163147	1
ENSMUSG00000025571	2342.08	2231.94	2452.23	1.0987	0.135797	0.163339	1
ENSMUSG00000070837	3.62066	5.25311	1.9882	0.378481	-1.40171	0.163378	1
ENSMUSG00000073448	0.697484	1.39497	0	0	-Inf	0.16342	1
ENSMUSG00000004366	3216.04	3067.16	3364.91	1.09708	0.133665	0.163498	1
ENSMUSG00000026754	661.131	697.075	625.188	0.896874	-0.157023	0.163582	1
ENSMUSG00000025962	150.917	163.083	138.75	0.850797	-0.233113	0.163585	1
ENSMUSG00000020436	220.928	236.442	205.414	0.868773	-0.20295	0.163767	1
ENSMUSG00000015357	534.439	564.635	504.243	0.893043	-0.163198	0.163847	1
ENSMUSG00000035173	984.236	1054.04	914.432	0.867548	-0.204984	0.164153	1
ENSMUSG00000042286	343.622	322.395	364.85	1.13169	0.178473	0.164158	1
ENSMUSG00000042680	357.511	335.756	379.267	1.12959	0.175804	0.164334	1
ENSMUSG00000020638	564.267	533.142	595.391	1.11676	0.159317	0.164363	1
ENSMUSG00000042063	129.478	141.448	117.509	0.83076	-0.267496	0.164461	1
ENSMUSG00000039478	734.35	786.407	682.294	0.86761	-0.204881	0.164756	1
ENSMUSG00000035152	5000.57	5231.33	4769.81	0.911777	-0.133247	0.164789	1
ENSMUSG00000033596	502.49	531.376	473.604	0.891278	-0.166052	0.164827	1
ENSMUSG00000048424	7.77507	10.0715	5.47862	0.543971	-0.878397	0.164841	1
ENSMUSG00000051401	38.4369	33.2402	43.6337	1.31268	0.392514	0.16492	1
ENSMUSG00000047040	2.49165	3.77132	1.21197	0.321365	-1.63771	0.165085	1
ENSMUSG00000040174	254.203	237.417	270.99	1.14141	0.190817	0.165559	1
ENSMUSG00000028932	2272.4	2380.55	2164.24	0.909133	-0.137437	0.165629	1
ENSMUSG00000027297	377.755	355.466	400.043	1.1254	0.170443	0.165741	1
ENSMUSG00000042599	414.581	440.801	388.362	0.881036	-0.182727	0.165765	1
ENSMUSG00000039901	426.655	451.343	401.966	0.890598	-0.167153	0.165885	1
ENSMUSG00000061410	1196.17	1135.35	1256.98	1.10713	0.14683	0.165915	1
ENSMUSG00000022032	70.4554	57.6142	83.2966	1.44577	0.531834	0.165991	1
ENSMUSG00000021565	23.2139	27.2668	19.1611	0.702726	-0.508966	0.166037	1
ENSMUSG00000028955	519.479	555.741	483.217	0.869502	-0.201739	0.166059	1
ENSMUSG00000053414	430.183	454.969	405.397	0.891042	-0.166435	0.166068	1
ENSMUSG00000026774	1.98247	0.800691	3.16425	3.9519	1.98254	0.166104	1
ENSMUSG00000030838	32.2364	25.8199	38.6528	1.49701	0.582087	0.166167	1
ENSMUSG00000006519	106.324	115.582	97.0668	0.839811	-0.251863	0.166169	1
ENSMUSG00000049672	499.116	543.759	454.474	0.8358	-0.25877	0.166183	1
ENSMUSG00000028013	576.159	608.656	543.663	0.893219	-0.162914	0.16622	1
ENSMUSG00000036751	6098.28	6458.69	5737.86	0.888394	-0.170728	0.166467	1
ENSMUSG00000040693	27.6254	23.255	31.9958	1.37586	0.460338	0.166569	1
ENSMUSG00000022390	3913.43	3729.58	4097.28	1.09859	0.135655	0.166591	1
ENSMUSG00000053873	1.97518	0.800691	3.14966	3.93368	1.97588	0.166675	1
ENSMUSG00000001403	4.99386	6.85705	3.13066	0.456561	-1.13112	0.166792	1
ENSMUSG00000027419	4340.34	4139.84	4540.85	1.09687	0.13339	0.166927	1
ENSMUSG00000070034	50.5288	56.5817	44.4758	0.786047	-0.347313	0.167122	1
ENSMUSG00000030589	42.1308	47.6387	36.6228	0.768762	-0.379391	0.16721	1
ENSMUSG00000056367	885.072	930.163	839.98	0.903046	-0.147128	0.167243	1
ENSMUSG00000026864	4005.95	4190.85	3821.05	0.91176	-0.133274	0.167247	1
ENSMUSG00000026567	1.96691	0.800424	3.13339	3.91466	1.96889	0.167328	1
ENSMUSG00000031497	111.075	124.281	97.8691	0.787485	-0.344675	0.167452	1
ENSMUSG00000038843	34.3453	39.3983	29.2923	0.743492	-0.427612	0.167478	1
ENSMUSG00000029595	187.965	173.312	202.618	1.16909	0.225389	0.167481	1
ENSMUSG00000030722	125.207	135.542	114.872	0.8475	-0.238715	0.167559	1
ENSMUSG00000072214	4152.94	3961.09	4344.8	1.09687	0.133395	0.167569	1
ENSMUSG00000044465	907.816	861.574	954.058	1.10734	0.147102	0.167626	1
ENSMUSG00000038463	183.836	197.033	170.639	0.866042	-0.20749	0.167681	1
ENSMUSG00000021555	613.02	649.647	576.393	0.88724	-0.172604	0.167691	1
ENSMUSG00000025358	77.2917	84.8961	69.6873	0.820853	-0.284803	0.167811	1
ENSMUSG00000020388	189.748	175.658	203.838	1.16043	0.214654	0.167888	1
ENSMUSG00000000632	2178.24	2073.12	2283.36	1.10141	0.139353	0.1679	1
ENSMUSG00000104346	154.97	143.186	166.754	1.1646	0.219836	0.168048	1
ENSMUSG00000026414	123.055	112.636	133.475	1.18501	0.244902	0.168146	1
ENSMUSG00000038199	5.567	3.62351	7.51049	2.07271	1.05152	0.168454	1
ENSMUSG00000035356	98.2701	89.3113	107.229	1.20062	0.263777	0.168499	1
ENSMUSG00000071267	56.9653	66.7125	47.2181	0.707785	-0.498616	0.16868	1
ENSMUSG00000058638	388.657	412.224	365.091	0.885664	-0.175169	0.168786	1
ENSMUSG00000073117	0.705364	0	1.41073	Inf	Inf	0.168854	1
ENSMUSG00000061816	7.92923	5.66405	10.1944	1.79984	0.847872	0.168857	1
ENSMUSG00000021575	14.536	11.4451	17.6269	1.54012	0.623046	0.169009	1
ENSMUSG00000002459	90.3991	80.6067	100.192	1.24297	0.313789	0.169126	1
ENSMUSG00000058773	5.54147	3.5807	7.50224	2.09519	1.06708	0.169169	1
ENSMUSG00000062961	212.606	197.676	227.536	1.15106	0.202961	0.169295	1
ENSMUSG00000026443	1443.39	1372.53	1514.25	1.10325	0.141764	0.169467	1
ENSMUSG00000006423	619.989	654.079	585.899	0.895761	-0.158814	0.169486	1
ENSMUSG00000074634	56.7534	48.9144	64.5925	1.32052	0.401106	0.169553	1
ENSMUSG00000027238	1298.34	1362.46	1234.22	0.905875	-0.142616	0.169595	1
ENSMUSG00000022978	50.6938	44.6129	56.7746	1.2726	0.347784	0.169698	1
ENSMUSG00000047528	1.37504	0.402216	2.34787	5.83734	2.54531	0.169761	1
ENSMUSG00000033793	1579.42	1661.64	1497.2	0.901037	-0.150342	0.16987	1
ENSMUSG00000014077	3061.73	3205.04	2918.41	0.910569	-0.135159	0.169877	1
ENSMUSG00000044165	47.7081	53.7085	41.7076	0.776554	-0.364842	0.169983	1
ENSMUSG00000007379	10.0177	7.45926	12.576	1.68596	0.753574	0.170086	1
ENSMUSG00000051223	1209.33	1268.98	1149.68	0.905985	-0.142441	0.170182	1
ENSMUSG00000034055	1038.52	1106.49	970.556	0.877152	-0.189101	0.170487	1
ENSMUSG00000037110	762.022	802.223	721.821	0.899776	-0.152362	0.170493	1
ENSMUSG00000053093	322.943	302.733	343.153	1.13352	0.180809	0.17073	1
ENSMUSG00000044786	141.554	130.406	152.702	1.17097	0.227702	0.170805	1
ENSMUSG00000000184	341.116	310.168	372.065	1.19956	0.262504	0.170863	1
ENSMUSG00000090891	2.99594	4.41748	1.57439	0.356401	-1.48843	0.17095	1
ENSMUSG00000042631	94.7859	85.9639	103.608	1.20525	0.269332	0.170951	1
ENSMUSG00000029673	976.287	926.958	1025.62	1.10643	0.145917	0.170977	1
ENSMUSG00000061911	2527.63	2412.34	2642.92	1.09558	0.1317	0.170996	1
ENSMUSG00000033964	124.848	137.443	112.252	0.816722	-0.292082	0.171061	1
ENSMUSG00000028521	238.097	259.394	216.8	0.835793	-0.258783	0.171103	1
ENSMUSG00000002835	135.017	124.131	145.903	1.17539	0.233143	0.17122	1
ENSMUSG00000089774	482.096	516.494	447.697	0.8668	-0.206228	0.171369	1
ENSMUSG00000033327	245.132	224.516	265.748	1.18365	0.243238	0.171378	1
ENSMUSG00000040584	697.632	734.754	660.509	0.898954	-0.153681	0.171471	1
ENSMUSG00000070883	30.7248	35.4009	26.0487	0.735819	-0.442577	0.171659	1
ENSMUSG00000058558	2746.57	2906.68	2586.47	0.889839	-0.168383	0.171746	1
ENSMUSG00000048280	48.1707	54.3055	42.0358	0.774061	-0.36948	0.171931	1
ENSMUSG00000004952	443.564	418.078	469.051	1.12192	0.165972	0.171942	1
ENSMUSG00000075266	19.2754	15.629	22.9219	1.46662	0.552498	0.17196	1
ENSMUSG00000022178	34.0943	29.1743	39.0143	1.33728	0.419303	0.171973	1
ENSMUSG00000063021	0.690996	0	1.38199	Inf	Inf	0.1721	1
ENSMUSG00000032328	1989.83	2098.38	1881.28	0.89654	-0.157561	0.17222	1
ENSMUSG00000021217	493.862	459.816	527.909	1.14809	0.199231	0.17244	1
ENSMUSG00000047953	33.9862	29.0754	38.8969	1.3378	0.419859	0.172472	1
ENSMUSG00000028719	537.933	567.744	508.123	0.894987	-0.160061	0.172638	1
ENSMUSG00000041986	1120.98	1057.15	1184.81	1.12076	0.164472	0.172708	1
ENSMUSG00000035851	651.382	686.705	616.058	0.897123	-0.156623	0.172816	1
ENSMUSG00000040648	857.379	917.688	797.07	0.868563	-0.203297	0.172844	1
ENSMUSG00000024535	266.72	284.957	248.483	0.872002	-0.197597	0.172947	1
ENSMUSG00000040761	1554.45	1476.72	1632.19	1.10528	0.144416	0.173168	1
ENSMUSG00000024749	3.48792	5.04535	1.93048	0.382625	-1.386	0.173209	1
ENSMUSG00000048411	0.685474	0	1.37095	Inf	Inf	0.17338	1
ENSMUSG00000054693	770.317	809.898	730.736	0.902258	-0.148388	0.173438	1
ENSMUSG00000020048	2004.78	2152.57	1857	0.862687	-0.213091	0.173507	1
ENSMUSG00000028551	22.4452	18.4715	26.4188	1.43025	0.516264	0.173623	1
ENSMUSG00000040274	64.1097	75.8802	52.3391	0.68976	-0.535834	0.173677	1
ENSMUSG00000049439	217.058	231.773	202.344	0.873027	-0.195902	0.173701	1
ENSMUSG00000051000	51.9276	43.5349	60.3202	1.38556	0.470469	0.173908	1
ENSMUSG00000006850	259.983	243.209	276.757	1.13794	0.186427	0.173985	1
ENSMUSG00000018470	3110.92	2969.79	3252.04	1.09504	0.130985	0.174041	1
ENSMUSG00000028218	284.774	302.902	266.645	0.8803	-0.183932	0.174089	1
ENSMUSG00000001227	1895.47	1807.13	1983.8	1.09777	0.134571	0.174109	1
ENSMUSG00000004980	8508.6	8955.19	8062.01	0.900261	-0.151584	0.174176	1
ENSMUSG00000001773	201.598	218.464	184.732	0.845594	-0.241962	0.174204	1
ENSMUSG00000044217	5.23095	7.05854	3.40335	0.48216	-1.05242	0.174339	1
ENSMUSG00000026775	674.486	714.787	634.185	0.887237	-0.172609	0.174345	1
ENSMUSG00000029777	2003.77	2107.98	1899.56	0.901129	-0.150194	0.174412	1
ENSMUSG00000037962	10.2489	7.61278	12.885	1.69255	0.759195	0.174435	1
ENSMUSG00000034639	81.5877	89.5356	73.6399	0.822466	-0.281972	0.17448	1
ENSMUSG00000027777	24.2465	20.2478	28.2452	1.39498	0.480245	0.174528	1
ENSMUSG00000046329	4798.98	4584.82	5013.14	1.09342	0.128849	0.174746	1
ENSMUSG00000027022	0.984763	1.96953	0	0	-Inf	0.174865	1
ENSMUSG00000060373	2364.22	2475.41	2253.03	0.910166	-0.135798	0.174869	1
ENSMUSG00000033088	314.514	291.427	337.602	1.15844	0.212188	0.175009	1
ENSMUSG00000048355	219.283	204.12	234.445	1.14856	0.199832	0.175009	1
ENSMUSG00000025816	1089.71	1144.97	1034.46	0.903479	-0.146437	0.175284	1
ENSMUSG00000074997	0.67728	0	1.35456	Inf	Inf	0.175314	1
ENSMUSG00000040022	290.865	272.98	308.749	1.13103	0.17764	0.1754	1
ENSMUSG00000024410	846.632	890.383	802.88	0.901724	-0.149242	0.175426	1
ENSMUSG00000027314	87.6078	97.3348	77.8808	0.800133	-0.321688	0.175568	1
ENSMUSG00000026027	504.366	535.876	472.856	0.882398	-0.180498	0.175597	1
ENSMUSG00000058927	79.825	87.6727	71.9773	0.820977	-0.284586	0.175632	1
ENSMUSG00000039004	132.616	112.698	152.535	1.35349	0.436683	0.175732	1
ENSMUSG00000032511	66.5465	59.6476	73.4454	1.23132	0.300209	0.175828	1
ENSMUSG00000070867	20.6336	16.8667	24.4006	1.44667	0.532734	0.175842	1
ENSMUSG00000000805	256.359	277.32	235.398	0.848829	-0.236455	0.175859	1
ENSMUSG00000020149	1640.98	1718.25	1563.7	0.910054	-0.135976	0.175923	1
ENSMUSG00000046688	40.5065	35.1783	45.8348	1.30293	0.381758	0.176163	1
ENSMUSG00000021294	172.574	184.927	160.221	0.8664	-0.206895	0.176223	1
ENSMUSG00000032193	1690.65	1610.22	1771.08	1.0999	0.137375	0.176245	1
ENSMUSG00000028565	626.477	660.573	592.381	0.896768	-0.157194	0.176436	1
ENSMUSG00000058099	36.0409	40.8412	31.2406	0.764928	-0.386605	0.176455	1
ENSMUSG00000023150	1425.03	1531.9	1318.16	0.860475	-0.216795	0.176625	1
ENSMUSG00000031667	2356.56	2466.47	2246.64	0.910874	-0.134676	0.176774	1
ENSMUSG00000041057	299.309	317.972	280.647	0.882615	-0.180143	0.176845	1
ENSMUSG00000002679	155.853	171.03	140.676	0.822522	-0.281874	0.176916	1
ENSMUSG00000052337	3168.43	3314.43	3022.43	0.9119	-0.133052	0.176952	1
ENSMUSG00000039059	722.091	678.145	766.038	1.12961	0.175823	0.17732	1
ENSMUSG00000039110	157.277	138.1	176.454	1.27772	0.353573	0.177323	1
ENSMUSG00000023963	46.4263	54.8686	37.984	0.692271	-0.53059	0.17736	1
ENSMUSG00000041161	215.777	200.882	230.672	1.14829	0.199493	0.177456	1
ENSMUSG00000037808	165.175	180.374	149.977	0.831478	-0.266251	0.177459	1
ENSMUSG00000028186	5.91548	7.83719	3.99378	0.509594	-0.97258	0.177475	1
ENSMUSG00000052302	1322.85	1260.26	1385.45	1.09934	0.136633	0.177774	1
ENSMUSG00000006678	52.9488	59.0362	46.8615	0.793775	-0.333198	0.177825	1
ENSMUSG00000037375	46.264	51.881	40.647	0.783466	-0.352057	0.177839	1
ENSMUSG00000035184	278.303	260.44	296.167	1.13718	0.185459	0.178042	1
ENSMUSG00000001260	216.405	246.069	186.741	0.758894	-0.398029	0.178053	1
ENSMUSG00000051495	617.39	580.873	653.907	1.12573	0.170864	0.178065	1
ENSMUSG00000063142	639.962	593.069	686.854	1.15814	0.211804	0.178115	1
ENSMUSG00000021144	984.301	934.511	1034.09	1.10656	0.14608	0.178275	1
ENSMUSG00000027555	57.1292	63.3555	50.9029	0.803449	-0.315721	0.178529	1
ENSMUSG00000030541	964.382	916.849	1011.92	1.10369	0.142332	0.178647	1
ENSMUSG00000033845	488.348	515.751	460.944	0.893733	-0.162084	0.178752	1
ENSMUSG00000040666	563.062	602.029	524.094	0.870547	-0.200006	0.178753	1
ENSMUSG00000069844	213.233	228.136	198.33	0.869349	-0.201993	0.178758	1
ENSMUSG00000038776	818.328	766.298	870.358	1.1358	0.183703	0.178892	1
ENSMUSG00000039738	611.389	578.69	644.087	1.11301	0.154464	0.178937	1
ENSMUSG00000044018	355.664	381.829	329.5	0.862953	-0.212646	0.178979	1
ENSMUSG00000028232	123.649	113.796	133.502	1.17316	0.230403	0.17903	1
ENSMUSG00000056481	38.2317	43.3332	33.1302	0.764546	-0.387325	0.179043	1
ENSMUSG00000057143	34.9294	39.8353	30.0234	0.753687	-0.407963	0.179163	1
ENSMUSG00000074737	6.73624	4.41681	9.05567	2.05027	1.03582	0.179234	1
ENSMUSG00000027774	1306.83	1370.67	1242.99	0.906847	-0.141068	0.179295	1
ENSMUSG00000027708	349.734	377.987	321.48	0.850506	-0.233606	0.179393	1
ENSMUSG00000040121	15.2952	18.4454	12.145	0.658429	-0.602899	0.179554	1
ENSMUSG00000073678	205.387	221.236	189.538	0.856722	-0.2231	0.179623	1
ENSMUSG00000028096	613.555	580.899	646.211	1.11243	0.153718	0.179654	1
ENSMUSG00000004698	399.463	376.513	422.413	1.12191	0.165954	0.17985	1
ENSMUSG00000071745	2.58976	1.20458	3.97494	3.29986	1.72241	0.179948	1
ENSMUSG00000026875	38.3367	33.2298	43.4435	1.30737	0.386663	0.18005	1
ENSMUSG00000002233	268.426	251.089	285.763	1.1381	0.186624	0.18018	1
ENSMUSG00000025576	3772.86	3602.02	3943.7	1.09486	0.130743	0.180189	1
ENSMUSG00000070407	109.996	100.449	119.544	1.19011	0.251089	0.180356	1
ENSMUSG00000031232	213.905	239.952	187.859	0.782904	-0.353092	0.180411	1
ENSMUSG00000028713	3.53864	1.4233	5.65398	3.97246	1.99003	0.180559	1
ENSMUSG00000036553	84.1109	91.9465	76.2753	0.829562	-0.269578	0.180561	1
ENSMUSG00000072437	106.792	115.845	97.7392	0.843709	-0.245182	0.180674	1
ENSMUSG00000032531	785.472	824.103	746.841	0.906247	-0.142024	0.180771	1
ENSMUSG00000029003	325.165	305.192	345.138	1.13089	0.177455	0.180804	1
ENSMUSG00000026458	3621.74	3460.27	3783.21	1.09333	0.128724	0.181008	1
ENSMUSG00000024497	5.17336	3.17892	7.16779	2.25479	1.17299	0.18111	1
ENSMUSG00000067144	47.7788	56.2217	39.336	0.699659	-0.515276	0.181242	1
ENSMUSG00000004151	651.016	692.875	609.157	0.879172	-0.185782	0.181337	1
ENSMUSG00000040550	757.759	799.397	716.121	0.895827	-0.158709	0.181355	1
ENSMUSG00000019856	818.236	860.998	775.474	0.900669	-0.150931	0.181414	1
ENSMUSG00000022400	2122.11	2219.4	2024.82	0.912329	-0.132374	0.18148	1
ENSMUSG00000032330	3836.82	4184.26	3489.38	0.833928	-0.262005	0.181584	1
ENSMUSG00000027808	576.117	545.225	607.009	1.11332	0.154867	0.181606	1
ENSMUSG00000036737	1617.48	1696.92	1538.05	0.906375	-0.141819	0.181876	1
ENSMUSG00000093661	109.468	118.805	100.131	0.842812	-0.246717	0.18196	1
ENSMUSG00000028073	203.839	217.627	190.051	0.873289	-0.195468	0.182005	1
ENSMUSG00000029718	144.282	109.832	178.732	1.62732	0.702499	0.18202	1
ENSMUSG00000062743	17.6572	21.0544	14.26	0.677294	-0.562146	0.182125	1
ENSMUSG00000010803	962.648	1129.44	795.86	0.704652	-0.505017	0.182188	1
ENSMUSG00000028228	190.957	205.572	176.343	0.857817	-0.221259	0.182244	1
ENSMUSG00000074170	325.602	283.975	367.229	1.29317	0.370915	0.182348	1
ENSMUSG00000036391	408.472	435.968	380.976	0.873863	-0.194521	0.182696	1
ENSMUSG00000023912	1397.15	1467.21	1327.08	0.904495	-0.144816	0.182831	1
ENSMUSG00000032470	1996	1903.1	2088.9	1.09764	0.134399	0.183149	1
ENSMUSG00000061462	55.3196	64.3284	46.3108	0.719913	-0.474106	0.183212	1
ENSMUSG00000027931	159.239	141.436	177.042	1.25175	0.323944	0.183339	1
ENSMUSG00000049353	19.7331	13.7743	25.6918	1.8652	0.899327	0.183456	1
ENSMUSG00000028458	1297.14	1234.95	1359.34	1.10073	0.138463	0.183513	1
ENSMUSG00000035594	6.58459	4.44847	8.72071	1.96038	0.971136	0.18365	1
ENSMUSG00000023861	3048.81	3184.76	2912.86	0.914624	-0.128749	0.183654	1
ENSMUSG00000032501	168.182	154.574	181.789	1.17606	0.233964	0.183803	1
ENSMUSG00000039578	155.257	143.798	166.716	1.15937	0.213345	0.183839	1
ENSMUSG00000020673	14.6771	17.6795	11.6747	0.660355	-0.598686	0.183855	1
ENSMUSG00000017897	183.019	169.833	196.205	1.15528	0.208244	0.183997	1
ENSMUSG00000002881	380.624	402.33	358.917	0.892098	-0.164727	0.184004	1
ENSMUSG00000056014	169.187	156.659	181.715	1.15994	0.214048	0.184027	1
ENSMUSG00000046402	179.87	149.223	210.518	1.41077	0.496479	0.184061	1
ENSMUSG00000045215	199.529	186.152	212.906	1.14372	0.193739	0.184092	1
ENSMUSG00000034917	25.0848	14.0438	36.1258	2.57236	1.36309	0.184246	1
ENSMUSG00000051375	2197.57	2096.5	2298.64	1.09642	0.132797	0.184296	1
ENSMUSG00000067158	73.0899	56.0997	90.0802	1.60572	0.683218	0.184306	1
ENSMUSG00000020718	74.3151	67.0906	81.5395	1.21536	0.281388	0.184411	1
ENSMUSG00000022753	4.699	3.00848	6.38951	2.12383	1.08667	0.184423	1
ENSMUSG00000023262	434.423	463.972	404.873	0.872625	-0.196566	0.184435	1
ENSMUSG00000004612	3.72334	5.22161	2.22507	0.426128	-1.23064	0.184439	1
ENSMUSG00000020196	2157.53	2058.38	2256.68	1.09634	0.132691	0.184465	1
ENSMUSG00000033809	216.098	230.444	201.752	0.875493	-0.191832	0.184511	1
ENSMUSG00000032946	1614.97	1542.6	1687.33	1.09383	0.129382	0.184548	1
ENSMUSG00000015619	33.2052	41.7158	24.6946	0.591972	-0.7564	0.184679	1
ENSMUSG00000021187	2.76812	1.41218	4.12407	2.92036	1.54615	0.184896	1
ENSMUSG00000040663	53.4683	60.5352	46.4014	0.76652	-0.383605	0.184919	1
ENSMUSG00000055197	10.0532	12.5284	7.57806	0.604869	-0.725306	0.184935	1
ENSMUSG00000027940	1518.24	1340.29	1696.19	1.26553	0.339747	0.185043	1
ENSMUSG00000032120	1493.25	1422.8	1563.69	1.09902	0.136217	0.185176	1
ENSMUSG00000059602	664.484	627.102	701.867	1.11922	0.162498	0.185419	1
ENSMUSG00000029007	549.358	519.51	579.205	1.11491	0.156923	0.185444	1
ENSMUSG00000096001	6.08504	8.00352	4.16655	0.52059	-0.941781	0.185469	1
ENSMUSG00000037892	111.235	121.47	101	0.831481	-0.266245	0.185481	1
ENSMUSG00000019235	931.697	886.603	976.791	1.10172	0.139761	0.1856	1
ENSMUSG00000058806	50.8962	45.0098	56.7826	1.26156	0.33521	0.185639	1
ENSMUSG00000050150	1.86869	2.96912	0.768252	0.258748	-1.95038	0.185901	1
ENSMUSG00000030111	785.045	719.437	850.653	1.18239	0.241703	0.185981	1
ENSMUSG00000028523	6.06162	8.01354	4.10971	0.512846	-0.963403	0.186012	1
ENSMUSG00000027722	179.84	192.477	167.203	0.868692	-0.203083	0.186051	1
ENSMUSG00000071550	177.197	146.694	207.7	1.41588	0.501697	0.186184	1
ENSMUSG00000028614	296.129	314.257	278.002	0.884631	-0.176853	0.186193	1
ENSMUSG00000068130	13.7284	16.6548	10.802	0.648586	-0.62463	0.18638	1
ENSMUSG00000021890	660.08	694.103	626.057	0.901966	-0.148856	0.186628	1
ENSMUSG00000053368	13.1012	10.2167	15.9857	1.56467	0.645854	0.186724	1
ENSMUSG00000040681	584.217	553.695	614.738	1.11025	0.150881	0.18676	1
ENSMUSG00000004626	467.912	493.7	442.123	0.895529	-0.159188	0.186892	1
ENSMUSG00000078234	788.018	741.767	834.269	1.12471	0.169547	0.186932	1
ENSMUSG00000066760	104.637	113.649	95.6259	0.841416	-0.24911	0.186944	1
ENSMUSG00000029102	5.91312	3.99613	7.83011	1.95942	0.97043	0.186996	1
ENSMUSG00000027400	270.189	240.481	299.897	1.24707	0.318545	0.187119	1
ENSMUSG00000043556	19.5988	15.7365	23.4611	1.49087	0.576156	0.187366	1
ENSMUSG00000055540	164.702	147.688	181.717	1.23041	0.299141	0.187384	1
ENSMUSG00000061171	22.1381	26.1712	18.1051	0.691793	-0.531588	0.187414	1
ENSMUSG00000091938	4.43628	2.19824	6.67432	3.03621	1.60227	0.187558	1
ENSMUSG00000110404	48.3946	42.6926	54.0966	1.26712	0.341553	0.187593	1
ENSMUSG00000032766	472.729	500.313	445.145	0.889733	-0.168555	0.187616	1
ENSMUSG00000103088	191.025	177.841	204.21	1.14827	0.199465	0.18763	1
ENSMUSG00000060572	61.5828	68.1214	55.0442	0.808031	-0.307518	0.187714	1
ENSMUSG00000022054	35464.7	37868.2	33061.1	0.873057	-0.195852	0.187785	1
ENSMUSG00000060510	286.624	304.077	269.17	0.885205	-0.175916	0.187848	1
ENSMUSG00000035506	27.4256	31.6072	23.244	0.735403	-0.443392	0.187924	1
ENSMUSG00000030353	20.7434	24.3538	17.1331	0.703506	-0.507366	0.187989	1
ENSMUSG00000034762	34.5418	29.812	39.2715	1.3173	0.397589	0.188027	1
ENSMUSG00000037826	596.025	627.511	564.539	0.899648	-0.152567	0.188074	1
ENSMUSG00000028949	1481.66	1413.1	1550.22	1.09703	0.133605	0.188171	1
ENSMUSG00000030321	214.244	199.965	228.523	1.14282	0.192598	0.188273	1
ENSMUSG00000023968	90.9645	100.031	81.8976	0.818718	-0.288562	0.188335	1
ENSMUSG00000006740	7142.87	7763.39	6522.35	0.840142	-0.251295	0.188452	1
ENSMUSG00000073792	104.706	95.688	113.725	1.1885	0.249137	0.188549	1
ENSMUSG00000056423	17.0195	22.2169	11.8222	0.532124	-0.910165	0.188587	1
ENSMUSG00000020634	1222.18	1313.22	1131.15	0.86136	-0.215311	0.188629	1
ENSMUSG00000071528	1860.25	1968.13	1752.37	0.890375	-0.167516	0.188766	1
ENSMUSG00000042105	2919.37	3050.37	2788.38	0.914112	-0.129557	0.188822	1
ENSMUSG00000047220	23.4248	19.6517	27.1979	1.384	0.468842	0.188833	1
ENSMUSG00000032409	92.2495	104.339	80.1604	0.768272	-0.38031	0.189192	1
ENSMUSG00000026480	101.162	109.721	92.6021	0.843977	-0.244725	0.189245	1
ENSMUSG00000072487	39.9158	34.8584	44.9731	1.29017	0.367558	0.189273	1
ENSMUSG00000097328	36.2492	31.3714	41.1271	1.31098	0.390641	0.189313	1
ENSMUSG00000038374	1019.57	1068.67	970.466	0.908103	-0.139072	0.189497	1
ENSMUSG00000027524	112.887	126.075	99.698	0.790781	-0.338649	0.189586	1
ENSMUSG00000024042	258.675	242.023	275.327	1.13761	0.186003	0.189821	1
ENSMUSG00000015405	23.558	27.3558	19.7601	0.722339	-0.469253	0.18985	1
ENSMUSG00000050410	144.249	133.258	155.24	1.16496	0.22028	0.189873	1
ENSMUSG00000070699	323.772	304.352	343.191	1.12761	0.173268	0.189949	1
ENSMUSG00000032503	1279.59	1215.69	1343.49	1.10513	0.144213	0.189971	1
ENSMUSG00000003227	2.99391	1.6089	4.37892	2.72168	1.4445	0.189979	1
ENSMUSG00000020448	609.882	641.284	578.481	0.902066	-0.148695	0.190072	1
ENSMUSG00000053411	1956.56	1867.48	2045.63	1.09539	0.131449	0.190081	1
ENSMUSG00000035237	663.566	629.796	697.336	1.10724	0.146971	0.190107	1
ENSMUSG00000043673	392.286	413.958	370.614	0.895294	-0.159567	0.190189	1
ENSMUSG00000031342	6410.54	6730.7	6090.39	0.904867	-0.144222	0.190226	1
ENSMUSG00000053930	397.51	375.329	419.69	1.11819	0.161168	0.190242	1
ENSMUSG00000051503	1.00551	1.8203	0.190711	0.104769	-3.25472	0.190302	1
ENSMUSG00000022359	312.665	331.542	293.788	0.886126	-0.174417	0.190328	1
ENSMUSG00000027692	2250.13	2147.07	2353.2	1.09601	0.132258	0.190499	1
ENSMUSG00000045680	1.59239	0.402818	2.78197	6.90628	2.78791	0.190618	1
ENSMUSG00000021621	193.675	207.131	180.218	0.870066	-0.200802	0.190691	1
ENSMUSG00000043020	21.1326	16.3738	25.8914	1.58127	0.66108	0.190738	1
ENSMUSG00000090691	54.5725	60.6075	48.5374	0.800848	-0.320399	0.190793	1
ENSMUSG00000021108	145.801	157.188	134.415	0.855121	-0.225799	0.190844	1
ENSMUSG00000073399	1.00164	1.79542	0.207863	0.115774	-3.11062	0.190913	1
ENSMUSG00000064264	284.55	301.84	267.26	0.885438	-0.175537	0.190997	1
ENSMUSG00000022765	282.378	314.674	250.083	0.794737	-0.33145	0.191024	1
ENSMUSG00000032643	16.0307	12.8287	19.2327	1.49919	0.584185	0.191173	1
ENSMUSG00000020646	459.213	484.999	433.427	0.893666	-0.162192	0.191268	1
ENSMUSG00000056427	367.87	388.29	347.451	0.894824	-0.160323	0.19131	1
ENSMUSG00000026830	2377.36	2555.78	2198.94	0.860382	-0.216951	0.191413	1
ENSMUSG00000079426	1277.75	1337.07	1218.42	0.911262	-0.134062	0.191596	1
ENSMUSG00000078350	1099.68	1046.37	1152.99	1.1019	0.139997	0.191785	1
ENSMUSG00000032261	1326.15	1387.26	1265.03	0.911893	-0.133064	0.19179	1
ENSMUSG00000035606	166.159	154.317	178.002	1.15348	0.20599	0.191798	1
ENSMUSG00000075227	326.817	304.293	349.341	1.14804	0.199173	0.191872	1
ENSMUSG00000025128	90.0868	81.5827	98.5909	1.20848	0.273191	0.191891	1
ENSMUSG00000031101	26.5509	30.5035	22.5982	0.740839	-0.432768	0.191899	1
ENSMUSG00000047789	564.862	594.807	534.916	0.899311	-0.153108	0.19193	1
ENSMUSG00000024454	2271.59	2375.17	2168.02	0.912785	-0.131654	0.192114	1
ENSMUSG00000024393	8660.52	8289.42	9031.61	1.08953	0.123711	0.192179	1
ENSMUSG00000038299	229.736	210.513	248.959	1.18263	0.241997	0.192194	1
ENSMUSG00000032875	4648.11	4443.48	4852.73	1.0921	0.127105	0.192202	1
ENSMUSG00000031766	92.9266	101.394	84.4594	0.832984	-0.263639	0.192479	1
ENSMUSG00000069053	4.70459	2.79873	6.61045	2.36195	1.23998	0.192522	1
ENSMUSG00000047181	1506.99	1438.31	1575.66	1.0955	0.13159	0.192635	1
ENSMUSG00000048373	5.23432	7.0877	3.38094	0.477016	-1.06789	0.192818	1
ENSMUSG00000035486	395.623	365.983	425.264	1.16198	0.216582	0.192832	1
ENSMUSG00000027301	62.3879	119.968	4.80742	0.0400724	-4.64125	0.19304	1
ENSMUSG00000031594	12.1195	14.8554	9.38351	0.631656	-0.662788	0.193239	1
ENSMUSG00000068246	11.3145	13.8129	8.81604	0.638245	-0.647818	0.193346	1
ENSMUSG00000023064	2525.64	2751.1	2300.18	0.836092	-0.258266	0.193525	1
ENSMUSG00000031298	37.7244	43.0976	32.3513	0.750652	-0.413784	0.193543	1
ENSMUSG00000038612	705.834	747.557	664.111	0.888375	-0.170759	0.193544	1
ENSMUSG00000078796	33.7751	27.0861	40.4642	1.49391	0.579095	0.193551	1
ENSMUSG00000021065	564.536	594.35	534.723	0.899677	-0.152522	0.193563	1
ENSMUSG00000101860	33.1435	28.4094	37.8777	1.33328	0.414981	0.193613	1
ENSMUSG00000035831	70.725	62.5245	78.9254	1.26231	0.336068	0.193623	1
ENSMUSG00000047793	1059.32	1009.07	1109.56	1.09959	0.136963	0.193637	1
ENSMUSG00000001076	14.5197	17.7653	11.2741	0.634615	-0.656046	0.19365	1
ENSMUSG00000043398	140.841	130.344	151.337	1.16106	0.215439	0.193704	1
ENSMUSG00000073424	192.136	178.024	206.248	1.15854	0.212307	0.19373	1
ENSMUSG00000054716	587.966	557.619	618.313	1.10884	0.149058	0.19376	1
ENSMUSG00000010825	333.083	314.152	352.015	1.12053	0.164175	0.193802	1
ENSMUSG00000041538	11.2703	13.8452	8.6953	0.628036	-0.67108	0.193874	1
ENSMUSG00000003354	182.561	169.904	195.218	1.14899	0.20037	0.194014	1
ENSMUSG00000030598	70.8427	63.819	77.8665	1.22012	0.287017	0.194068	1
ENSMUSG00000068335	36.8145	31.882	41.7469	1.30942	0.388928	0.19408	1
ENSMUSG00000043445	1116.51	1039.95	1193.06	1.14722	0.198147	0.194134	1
ENSMUSG00000070576	170.047	181.89	158.204	0.869777	-0.201282	0.194229	1
ENSMUSG00000029287	327.249	306.2	348.298	1.13749	0.185852	0.194275	1
ENSMUSG00000028217	1.30822	2.21878	0.397672	0.17923	-2.48011	0.194326	1
ENSMUSG00000020912	1.88934	2.99591	0.782767	0.261279	-1.93634	0.19439	1
ENSMUSG00000033147	282.669	299.792	265.547	0.885772	-0.174992	0.194397	1
ENSMUSG00000007107	1.30701	2.21461	0.399408	0.180352	-2.47112	0.194472	1
ENSMUSG00000025608	710.77	761.636	659.903	0.866429	-0.206847	0.194684	1
ENSMUSG00000057561	440.53	469.762	411.297	0.875543	-0.191751	0.194754	1
ENSMUSG00000000157	1.30363	2.19153	0.415726	0.189697	-2.39823	0.194879	1
ENSMUSG00000026333	123.465	135.535	111.396	0.821902	-0.282962	0.194966	1
ENSMUSG00000043953	21.8909	26.2981	17.4837	0.664827	-0.588948	0.195041	1
ENSMUSG00000067194	1418.71	1484.38	1353.03	0.911512	-0.133667	0.195053	1
ENSMUSG00000035900	1008.58	960.429	1056.72	1.10026	0.137845	0.195096	1
ENSMUSG00000061882	93.8201	85.6331	102.007	1.19121	0.252428	0.195231	1
ENSMUSG00000025857	208.115	194.046	222.184	1.14501	0.195356	0.195312	1
ENSMUSG00000015968	867.97	825.641	910.3	1.10254	0.140828	0.195371	1
ENSMUSG00000030177	167.76	179.503	156.018	0.869168	-0.202293	0.195456	1
ENSMUSG00000091264	1319.84	1381.14	1258.54	0.911234	-0.134106	0.195513	1
ENSMUSG00000027201	1147.21	1211.43	1082.99	0.893974	-0.161695	0.195513	1
ENSMUSG00000036381	37.6323	42.5343	32.7302	0.769501	-0.378004	0.19556	1
ENSMUSG00000025933	436.889	469.676	404.102	0.860385	-0.216946	0.195852	1
ENSMUSG00000017868	97.0677	105.172	88.9635	0.845886	-0.241465	0.195895	1
ENSMUSG00000025134	377.475	356.081	398.869	1.12016	0.16371	0.195949	1
ENSMUSG00000019256	68.1311	61.5669	74.6953	1.21324	0.278864	0.195999	1
ENSMUSG00000017478	960.352	913.624	1007.08	1.10229	0.140507	0.196047	1
ENSMUSG00000044155	272.833	289.467	256.2	0.885075	-0.176129	0.196153	1
ENSMUSG00000034384	24.5322	19.7502	29.3142	1.48425	0.569738	0.196171	1
ENSMUSG00000031176	1424.21	1506.17	1342.24	0.891161	-0.166242	0.196194	1
ENSMUSG00000031706	765.213	728.385	802.042	1.10112	0.138977	0.196284	1
ENSMUSG00000028649	12401.2	11895.1	12907.3	1.0851	0.117822	0.196284	1
ENSMUSG00000010175	327.487	352.705	302.269	0.857001	-0.222631	0.196299	1
ENSMUSG00000014813	50.3446	56.1767	44.5124	0.792364	-0.335765	0.196425	1
ENSMUSG00000027434	151.475	164.006	138.945	0.847195	-0.239235	0.196446	1
ENSMUSG00000040483	244.165	259.478	228.852	0.881969	-0.181201	0.196486	1
ENSMUSG00000071856	354.972	334.675	375.27	1.1213	0.165168	0.19651	1
ENSMUSG00000018433	275.319	293.873	256.766	0.873731	-0.194738	0.196521	1
ENSMUSG00000059412	20.1803	16.7332	23.6274	1.412	0.497743	0.196649	1
ENSMUSG00000020863	1331.68	1448.17	1215.19	0.839123	-0.253046	0.196881	1
ENSMUSG00000044734	490.118	540.011	440.225	0.815215	-0.294748	0.196924	1
ENSMUSG00000025959	795.591	842.307	748.875	0.889076	-0.169621	0.196968	1
ENSMUSG00000018217	1374.82	1462.17	1287.48	0.880529	-0.183558	0.197237	1
ENSMUSG00000020387	1507.62	1439.36	1575.87	1.09484	0.130716	0.19726	1
ENSMUSG00000024212	1002.21	953.788	1050.63	1.10153	0.139512	0.197263	1
ENSMUSG00000047246	43.0716	48.3341	37.8091	0.782245	-0.354307	0.197303	1
ENSMUSG00000043991	413.992	376.538	451.446	1.19894	0.261756	0.197426	1
ENSMUSG00000058174	113.987	104.628	123.347	1.17891	0.23745	0.197478	1
ENSMUSG00000038135	7.56946	5.42514	9.71379	1.79051	0.840374	0.197771	1
ENSMUSG00000079654	178.935	166.729	191.141	1.14642	0.197136	0.197817	1
ENSMUSG00000045664	517.7	545.41	489.99	0.898389	-0.154588	0.197844	1
ENSMUSG00000052387	2671.92	2309.41	3034.43	1.31394	0.393901	0.197849	1
ENSMUSG00000032116	248.252	263.636	232.868	0.883292	-0.179038	0.197909	1
ENSMUSG00000027961	10.9807	14.1462	7.81513	0.552454	-0.856074	0.197945	1
ENSMUSG00000039210	436.762	413.361	460.162	1.11322	0.154737	0.197955	1
ENSMUSG00000005864	7.55939	5.42627	9.69251	1.78622	0.836911	0.19799	1
ENSMUSG00000031070	9.96441	12.5274	7.40139	0.590815	-0.759223	0.19805	1
ENSMUSG00000014791	75.9491	68.0595	83.8387	1.23184	0.30082	0.198262	1
ENSMUSG00000020059	5.07831	6.83413	3.3225	0.486164	-1.04049	0.198374	1
ENSMUSG00000032373	185.26	107.418	263.102	2.44932	1.29238	0.198678	1
ENSMUSG00000030041	2.91832	4.23336	1.60329	0.378727	-1.40077	0.198729	1
ENSMUSG00000024413	1895.96	1979.29	1812.63	0.915798	-0.126898	0.198776	1
ENSMUSG00000020152	1848.87	1930.66	1767.09	0.915277	-0.12772	0.198814	1
ENSMUSG00000072258	454.522	478.801	430.243	0.898584	-0.154275	0.198866	1
ENSMUSG00000027552	60.2903	68.766	51.8147	0.753493	-0.408335	0.198892	1
ENSMUSG00000045591	12.6902	9.99745	15.383	1.53869	0.621705	0.198894	1
ENSMUSG00000007029	1399.6	1336.08	1463.11	1.09508	0.13103	0.199119	1
ENSMUSG00000027875	133.947	121.771	146.123	1.19998	0.263012	0.199215	1
ENSMUSG00000029570	709.122	658.793	759.452	1.15279	0.205133	0.199232	1
ENSMUSG00000024909	355.655	335.484	375.827	1.12025	0.163821	0.19926	1
ENSMUSG00000029177	25.9498	29.9513	21.9484	0.7328	-0.448508	0.199498	1
ENSMUSG00000038886	5895.45	5646.91	6143.99	1.08803	0.121715	0.199605	1
ENSMUSG00000057897	10897.9	10443	11352.9	1.08713	0.120518	0.199671	1
ENSMUSG00000037316	445.065	420.679	469.451	1.11593	0.158252	0.199721	1
ENSMUSG00000029348	1144.73	1091.14	1198.31	1.09821	0.135153	0.199822	1
ENSMUSG00000040797	11103.4	10643.2	11563.6	1.08648	0.119657	0.199826	1
ENSMUSG00000036093	560.708	605.886	515.531	0.850872	-0.232987	0.199934	1
ENSMUSG00000078137	6.46389	8.45739	4.4704	0.528579	-0.919809	0.199936	1
ENSMUSG00000058402	188.624	201.561	175.687	0.871629	-0.198214	0.199997	1
ENSMUSG00000096433	36.7194	41.4554	31.9833	0.771513	-0.374238	0.200025	1
ENSMUSG00000011486	10.5516	8.0566	13.0465	1.61936	0.695424	0.200117	1
ENSMUSG00000007850	3742.57	3905.08	3580.05	0.916766	-0.125374	0.200148	1
ENSMUSG00000035279	140.276	154.457	126.095	0.816382	-0.292685	0.200179	1
ENSMUSG00000024737	31.5884	27.0787	36.0981	1.33308	0.414762	0.200219	1
ENSMUSG00000050138	197.684	181.371	213.997	1.17988	0.238642	0.200235	1
ENSMUSG00000047284	3050.73	2917.95	3183.51	1.09101	0.125665	0.200246	1
ENSMUSG00000058392	525.221	497.937	552.505	1.10959	0.150024	0.200305	1
ENSMUSG00000027330	391.543	370.404	412.682	1.11414	0.15593	0.200338	1
ENSMUSG00000041729	2712.74	2592.59	2832.89	1.09268	0.127876	0.200529	1
ENSMUSG00000042700	2754.51	2632.67	2876.36	1.09257	0.127722	0.200577	1
ENSMUSG00000030335	1225.75	1282.61	1168.88	0.911328	-0.133957	0.200612	1
ENSMUSG00000035227	1158.86	1211.7	1106.03	0.912795	-0.131638	0.200804	1
ENSMUSG00000031570	328.11	347.966	308.254	0.885874	-0.174827	0.200832	1
ENSMUSG00000015337	284.131	265.436	302.826	1.14086	0.190124	0.200848	1
ENSMUSG00000031320	3261.06	3583.35	2938.77	0.820117	-0.286098	0.20085	1
ENSMUSG00000019837	411.317	433.784	388.85	0.896415	-0.157761	0.200901	1
ENSMUSG00000004085	275.097	291.866	258.328	0.885093	-0.176099	0.201179	1
ENSMUSG00000029538	531.566	504.422	558.71	1.10762	0.147468	0.20118	1
ENSMUSG00000018209	577.353	607.184	547.522	0.90174	-0.149216	0.201189	1
ENSMUSG00000044197	575.594	546.231	604.957	1.10751	0.147321	0.201325	1
ENSMUSG00000056537	514.656	541.401	487.911	0.901201	-0.150078	0.201342	1
ENSMUSG00000024472	1804.3	1887.23	1721.38	0.912124	-0.132699	0.201358	1
ENSMUSG00000037157	2.7017	1.42397	3.97942	2.79459	1.48264	0.201363	1
ENSMUSG00000036810	205.436	219.064	191.808	0.875583	-0.191685	0.201376	1
ENSMUSG00000042388	1975.65	1868.21	2083.08	1.11501	0.157059	0.201399	1
ENSMUSG00000054128	1.0011	0.195429	1.80678	9.24518	3.2087	0.201533	1
ENSMUSG00000025019	75.0618	65.5495	84.574	1.29023	0.36763	0.201637	1
ENSMUSG00000052675	310.831	292.685	328.977	1.124	0.168638	0.201701	1
ENSMUSG00000039103	127.475	145.728	109.222	0.749492	-0.416015	0.201735	1
ENSMUSG00000005968	179.026	165.568	192.485	1.16257	0.21732	0.201838	1
ENSMUSG00000038302	299.899	317.677	282.121	0.888076	-0.171246	0.201879	1
ENSMUSG00000025436	127.229	117.553	136.905	1.16462	0.219856	0.201928	1
ENSMUSG00000056459	168.379	156.71	180.049	1.14893	0.200291	0.201945	1
ENSMUSG00000046807	1781.1	1700.54	1861.67	1.09475	0.1306	0.202011	1
ENSMUSG00000022674	339.954	374.099	305.809	0.817454	-0.29079	0.202098	1
ENSMUSG00000027957	202.446	216.794	188.097	0.86763	-0.204849	0.20218	1
ENSMUSG00000035297	1345.04	1407.24	1282.83	0.911597	-0.133532	0.202279	1
ENSMUSG00000028176	228.881	214.698	243.064	1.13212	0.179024	0.20241	1
ENSMUSG00000042473	45.9782	51.3673	40.5892	0.790176	-0.339754	0.202428	1
ENSMUSG00000024146	646.596	678.56	614.632	0.905789	-0.142752	0.202443	1
ENSMUSG00000021974	409.955	432.932	386.978	0.893855	-0.161888	0.202451	1
ENSMUSG00000027998	813.328	852.763	773.894	0.907514	-0.140008	0.202558	1
ENSMUSG00000049588	21.6774	18.0948	25.26	1.39598	0.481276	0.202673	1
ENSMUSG00000060904	1991.29	2093	1889.57	0.902804	-0.147515	0.202697	1
ENSMUSG00000022799	920.757	963.657	877.858	0.910965	-0.134532	0.20287	1
ENSMUSG00000028030	304.068	322.072	286.064	0.888198	-0.171046	0.202962	1
ENSMUSG00000032932	562.372	593.032	531.712	0.896599	-0.157465	0.202983	1
ENSMUSG00000075427	0.992133	0.201108	1.78316	8.86666	3.14839	0.203054	1
ENSMUSG00000078926	2.6729	1.40719	3.93861	2.79891	1.48486	0.203139	1
ENSMUSG00000021647	226.004	203.672	248.335	1.21929	0.286043	0.203216	1
ENSMUSG00000034810	37.9595	33.1711	42.7479	1.28871	0.365927	0.203458	1
ENSMUSG00000033039	3080.63	2942.86	3218.41	1.09363	0.129126	0.203525	1
ENSMUSG00000024667	137.531	148.624	126.437	0.850715	-0.233251	0.203635	1
ENSMUSG00000014773	184.251	171.566	196.936	1.14788	0.198969	0.203858	1
ENSMUSG00000046546	483.702	458.006	509.397	1.11221	0.153424	0.204028	1
ENSMUSG00000034610	249.11	272.842	225.379	0.826041	-0.275714	0.204087	1
ENSMUSG00000024505	31.0471	35.2278	26.8664	0.762648	-0.39091	0.204117	1
ENSMUSG00000043091	47.0302	32.8921	61.1683	1.85967	0.895046	0.204167	1
ENSMUSG00000062797	529.842	557.47	502.214	0.900881	-0.150591	0.204394	1
ENSMUSG00000033207	31.8603	27.4036	36.3169	1.32526	0.406273	0.204435	1
ENSMUSG00000033722	628.442	596.283	660.602	1.10787	0.147782	0.204441	1
ENSMUSG00000025225	91.4047	99.224	83.5854	0.842391	-0.247438	0.204493	1
ENSMUSG00000046761	85.4696	77.9996	92.9395	1.19154	0.252826	0.204497	1
ENSMUSG00000062867	1111.04	1162.02	1060.07	0.912265	-0.132475	0.204498	1
ENSMUSG00000000385	4.30375	2.60115	6.00635	2.30912	1.20734	0.204531	1
ENSMUSG00000038086	10.7743	8.2448	13.3037	1.61359	0.690273	0.204625	1
ENSMUSG00000039316	532.161	500.379	563.942	1.12703	0.172525	0.204652	1
ENSMUSG00000020647	2254.96	2158.29	2351.64	1.08959	0.12378	0.204721	1
ENSMUSG00000020734	1089.53	1173.62	1005.44	0.856702	-0.223135	0.204766	1
ENSMUSG00000027751	697.334	737.903	656.764	0.890041	-0.168056	0.20487	1
ENSMUSG00000042043	664.941	713.925	615.956	0.862774	-0.212945	0.2049	1
ENSMUSG00000020513	96.5166	105.452	87.5816	0.830539	-0.267881	0.20503	1
ENSMUSG00000017376	604.845	635.206	574.483	0.904404	-0.144961	0.205102	1
ENSMUSG00000022681	742.807	779.059	706.555	0.906934	-0.140931	0.20519	1
ENSMUSG00000022309	53.9416	62.3936	45.4896	0.729074	-0.455863	0.205215	1
ENSMUSG00000031918	1227.87	1295.42	1160.31	0.895699	-0.158914	0.20537	1
ENSMUSG00000043501	7.00174	4.97193	9.03155	1.81651	0.861169	0.205377	1
ENSMUSG00000017561	374.96	395.424	354.497	0.896498	-0.157628	0.205476	1
ENSMUSG00000056666	428.929	405.131	452.726	1.11748	0.160251	0.205623	1
ENSMUSG00000008373	1256.11	1312.23	1199.99	0.914469	-0.128994	0.205752	1
ENSMUSG00000025324	467.881	496.389	439.373	0.88514	-0.176023	0.205801	1
ENSMUSG00000041199	1151.71	1094.3	1209.13	1.10494	0.143963	0.205812	1
ENSMUSG00000026455	825.841	865.954	785.728	0.907356	-0.140259	0.20603	1
ENSMUSG00000036641	185.016	200.285	169.747	0.847526	-0.23867	0.206217	1
ENSMUSG00000028576	146.528	163.682	129.374	0.790399	-0.339346	0.206231	1
ENSMUSG00000110324	8.30254	10.4738	6.13124	0.585386	-0.772539	0.20625	1
ENSMUSG00000070806	14.932	12.0284	17.8356	1.48279	0.568312	0.206347	1
ENSMUSG00000073610	0.97199	0.205021	1.73896	8.48184	3.08438	0.206554	1
ENSMUSG00000019818	792.67	830.303	755.037	0.909352	-0.13709	0.20661	1
ENSMUSG00000015217	490.369	515.717	465.02	0.901697	-0.149285	0.206642	1
ENSMUSG00000047746	156.508	170.547	142.469	0.835366	-0.259519	0.206748	1
ENSMUSG00000079445	17.8477	14.675	21.0205	1.4324	0.518434	0.206751	1
ENSMUSG00000027956	361.942	397.736	326.147	0.820008	-0.28629	0.206812	1
ENSMUSG00000028476	293.771	276.688	310.854	1.12348	0.167979	0.207057	1
ENSMUSG00000043747	17.5974	20.7956	14.3993	0.692421	-0.530278	0.207076	1
ENSMUSG00000054764	2.11752	3.21377	1.02126	0.317777	-1.65392	0.207135	1
ENSMUSG00000038079	346.095	317.228	374.962	1.18199	0.241221	0.207178	1
ENSMUSG00000032087	1144.7	1089.13	1200.26	1.10203	0.140161	0.2072	1
ENSMUSG00000030970	630.713	600.499	660.926	1.10063	0.138327	0.207409	1
ENSMUSG00000002028	4581.74	4395.25	4768.24	1.08486	0.11751	0.207445	1
ENSMUSG00000016028	55.2493	46.9643	63.5344	1.35282	0.435974	0.207663	1
ENSMUSG00000043614	350.94	330.139	371.741	1.12601	0.171225	0.207741	1
ENSMUSG00000025215	9.05429	11.9299	6.17865	0.517911	-0.949224	0.207843	1
ENSMUSG00000057182	623.583	685.625	561.541	0.819021	-0.288029	0.207922	1
ENSMUSG00000000673	9.14926	11.4235	6.87507	0.601837	-0.732554	0.208072	1
ENSMUSG00000024474	2539.31	2650.03	2428.58	0.916435	-0.125896	0.208196	1
ENSMUSG00000041014	233.285	218.106	248.463	1.13919	0.188003	0.208271	1
ENSMUSG00000039156	526.358	499.168	553.549	1.10894	0.149185	0.208293	1
ENSMUSG00000013662	568.342	615.292	521.393	0.847391	-0.2389	0.208314	1
ENSMUSG00000031727	98.7272	109.063	88.3919	0.810469	-0.303171	0.208369	1
ENSMUSG00000063253	946.444	992.151	900.736	0.907861	-0.139456	0.20837	1
ENSMUSG00000025290	3419.74	3772.33	3067.15	0.813066	-0.298556	0.208435	1
ENSMUSG00000026640	2317.41	2220.29	2414.53	1.08748	0.120995	0.20844	1
ENSMUSG00000008601	9.1223	11.4512	6.79338	0.593245	-0.7533	0.208486	1
ENSMUSG00000029423	9.11702	11.4393	6.79472	0.593978	-0.751518	0.208568	1
ENSMUSG00000029014	261.334	279.489	243.18	0.87009	-0.200764	0.208985	1
ENSMUSG00000111517	3.15357	1.81199	4.49516	2.48079	1.3108	0.208999	1
ENSMUSG00000029552	59.3228	53.3755	65.2701	1.22285	0.290244	0.209119	1
ENSMUSG00000034601	120.405	130.024	110.786	0.852042	-0.231003	0.20913	1
ENSMUSG00000054555	68.2953	61.6588	74.9318	1.21526	0.281271	0.209336	1
ENSMUSG00000079553	59.5333	65.767	53.2996	0.810431	-0.303239	0.209668	1
ENSMUSG00000005237	165.518	150.894	180.141	1.19382	0.255591	0.209694	1
ENSMUSG00000026915	1926.96	2041.95	1811.97	0.887371	-0.17239	0.209702	1
ENSMUSG00000006958	456.246	432.805	479.688	1.10832	0.148379	0.20977	1
ENSMUSG00000032123	312.348	330.2	294.496	0.891872	-0.165091	0.209801	1
ENSMUSG00000008999	131.999	119.32	144.677	1.21251	0.277995	0.209871	1
ENSMUSG00000071723	340.337	359.84	320.834	0.891602	-0.165529	0.210148	1
ENSMUSG00000044674	375.079	350.694	399.465	1.13907	0.187854	0.210214	1
ENSMUSG00000036241	1132.56	1183.82	1081.3	0.913395	-0.130689	0.210264	1
ENSMUSG00000032741	1178.25	1123.32	1233.17	1.09779	0.134598	0.210739	1
ENSMUSG00000070047	2248.01	2151.12	2344.91	1.09008	0.12444	0.21082	1
ENSMUSG00000021990	394.295	366.273	422.316	1.15301	0.205401	0.210918	1
ENSMUSG00000026579	133.63	51.6285	215.632	4.1766	2.06233	0.210996	1
ENSMUSG00000021070	66.7648	59.7067	73.823	1.23643	0.306178	0.211147	1
ENSMUSG00000022698	503.668	529.485	477.851	0.902484	-0.148026	0.211208	1
ENSMUSG00000038147	25.7938	29.6042	21.9834	0.742577	-0.429387	0.211251	1
ENSMUSG00000005621	761.938	724.727	799.149	1.10269	0.141026	0.211313	1
ENSMUSG00000028057	717.22	751.688	682.752	0.908292	-0.138772	0.211582	1
ENSMUSG00000036572	412.483	441.251	383.714	0.869605	-0.201568	0.211592	1
ENSMUSG00000035239	130.882	121.139	140.625	1.16085	0.215187	0.211693	1
ENSMUSG00000000409	27.8372	23.8731	31.8012	1.33209	0.413691	0.211789	1
ENSMUSG00000063884	556.035	594.835	517.235	0.869544	-0.201669	0.211825	1
ENSMUSG00000042133	637.555	706.375	568.735	0.805147	-0.312677	0.211885	1
ENSMUSG00000019842	104.259	112.675	95.8427	0.850612	-0.233427	0.211919	1
ENSMUSG00000050605	303.357	286.135	320.579	1.12038	0.163984	0.211923	1
ENSMUSG00000026018	374.016	394.83	353.203	0.894568	-0.160736	0.211932	1
ENSMUSG00000031871	325.083	342.852	307.314	0.896345	-0.157874	0.212024	1
ENSMUSG00000028247	356.21	375.976	336.443	0.894852	-0.160279	0.212549	1
ENSMUSG00000050272	1599.28	1529.56	1668.99	1.09116	0.125863	0.212627	1
ENSMUSG00000038368	1307.71	1366.45	1248.97	0.914027	-0.129691	0.212818	1
ENSMUSG00000037161	6.26275	8.06999	4.45551	0.552108	-0.856977	0.21285	1
ENSMUSG00000025931	4399.66	4579.99	4219.33	0.921254	-0.118329	0.212855	1
ENSMUSG00000004677	2263.43	2167.97	2358.89	1.08806	0.121764	0.213004	1
ENSMUSG00000045038	2408.26	2305.61	2510.9	1.08904	0.123056	0.213107	1
ENSMUSG00000047787	377.381	356.04	398.722	1.11988	0.163345	0.213158	1
ENSMUSG00000041390	35.4942	25.6443	45.344	1.76819	0.822275	0.213645	1
ENSMUSG00000031452	2.40099	1.22223	3.57975	2.92887	1.55035	0.213688	1
ENSMUSG00000055900	41.0816	46.0114	36.1518	0.785715	-0.347923	0.213809	1
ENSMUSG00000044164	216.377	202.881	229.874	1.13305	0.180209	0.213819	1
ENSMUSG00000062044	3403.15	3263.7	3542.61	1.08546	0.118303	0.213887	1
ENSMUSG00000096856	13.5515	10.8299	16.2731	1.50261	0.587466	0.213909	1
ENSMUSG00000013155	124.583	115.225	133.942	1.16244	0.217156	0.21391	1
ENSMUSG00000007591	9.586	7.29261	11.8794	1.62896	0.703956	0.214058	1
ENSMUSG00000009585	94.2855	86.4286	102.142	1.18181	0.241001	0.214109	1
ENSMUSG00000028121	277.904	261.62	294.188	1.12449	0.169267	0.214282	1
ENSMUSG00000028300	303.974	327.147	280.801	0.858331	-0.220393	0.21435	1
ENSMUSG00000036282	179.925	168.02	191.831	1.14172	0.191204	0.214393	1
ENSMUSG00000037784	552.815	525.638	579.992	1.10341	0.141963	0.214485	1
ENSMUSG00000091519	41.7006	36.8958	46.5054	1.26045	0.333942	0.214585	1
ENSMUSG00000062960	299.232	333.881	264.584	0.79245	-0.335608	0.214928	1
ENSMUSG00000025738	4067.66	3893.08	4242.23	1.08969	0.123912	0.214974	1
ENSMUSG00000017195	2.59567	3.8013	1.39004	0.365675	-1.45137	0.215052	1
ENSMUSG00000022035	689.694	743.538	635.85	0.855169	-0.225719	0.215148	1
ENSMUSG00000045064	86.9838	79.4055	94.562	1.19087	0.252021	0.215165	1
ENSMUSG00000018189	414.338	436.529	392.147	0.898328	-0.154685	0.215198	1
ENSMUSG00000032245	264.062	248.179	279.945	1.128	0.173765	0.215257	1
ENSMUSG00000075410	125.478	115.952	135.004	1.16431	0.219471	0.215369	1
ENSMUSG00000028023	9.50095	7.18414	11.8178	1.64498	0.718068	0.215567	1
ENSMUSG00000030059	556.269	597.646	514.891	0.861531	-0.215025	0.215724	1
ENSMUSG00000021782	1666.69	1595.55	1737.82	1.08917	0.123229	0.215822	1
ENSMUSG00000061979	400.606	379.194	422.018	1.11293	0.154366	0.215885	1
ENSMUSG00000042857	68.2092	61.6151	74.8034	1.21404	0.27982	0.215953	1
ENSMUSG00000044787	29.4268	24.6337	34.2199	1.38915	0.474205	0.216049	1
ENSMUSG00000043207	467.55	491.692	443.408	0.9018	-0.149121	0.21623	1
ENSMUSG00000051497	808.233	846.344	770.123	0.909941	-0.136154	0.216261	1
ENSMUSG00000024913	325.3	307.05	343.551	1.11888	0.162051	0.216391	1
ENSMUSG00000032621	998.795	1057.55	940.045	0.888892	-0.169919	0.216393	1
ENSMUSG00000002384	12.4081	15.0829	9.73338	0.645327	-0.631897	0.216448	1
ENSMUSG00000056222	4679.44	4488.25	4870.63	1.0852	0.117954	0.216483	1
ENSMUSG00000043067	1573.76	1641.5	1506.02	0.917467	-0.124272	0.216507	1
ENSMUSG00000079355	12.838	6.82702	18.8489	2.76093	1.46515	0.216557	1
ENSMUSG00000042901	623.245	654.213	592.276	0.905325	-0.143492	0.216764	1
ENSMUSG00000032009	1997.68	1913.33	2082.04	1.08817	0.121907	0.216893	1
ENSMUSG00000034032	626.522	596.287	656.757	1.10141	0.139352	0.216941	1
ENSMUSG00000033177	26.0704	22.275	29.8657	1.34077	0.423064	0.217101	1
ENSMUSG00000094410	9.56524	11.8761	7.25439	0.61084	-0.711135	0.217199	1
ENSMUSG00000051335	2048.79	2134.02	1963.56	0.920124	-0.120099	0.21726	1
ENSMUSG00000070330	43.8606	38.7523	48.9688	1.26363	0.337578	0.217298	1
ENSMUSG00000028677	3012.97	2885.1	3140.83	1.08864	0.122525	0.217351	1
ENSMUSG00000025270	128.012	148.836	107.188	0.720173	-0.473584	0.21739	1
ENSMUSG00000026248	434.095	456.633	411.556	0.901284	-0.149946	0.217394	1
ENSMUSG00000047777	231.875	217.395	246.354	1.13321	0.180417	0.217528	1
ENSMUSG00000041189	20.6089	17.2706	23.9472	1.38659	0.471537	0.217598	1
ENSMUSG00000025610	9.536	11.8736	7.19835	0.606246	-0.722024	0.21763	1
ENSMUSG00000050052	470.142	494.37	445.914	0.901984	-0.148826	0.217641	1
ENSMUSG00000003382	853.512	813.312	893.711	1.09885	0.136001	0.217764	1
ENSMUSG00000064202	61.5777	67.8287	55.3266	0.815682	-0.293922	0.217805	1
ENSMUSG00000033768	5214.66	4999.68	5429.64	1.086	0.11902	0.218021	1
ENSMUSG00000054381	147.439	137.164	157.714	1.14982	0.201408	0.218158	1
ENSMUSG00000050777	23.9036	27.5522	20.255	0.73515	-0.44389	0.218759	1
ENSMUSG00000039648	669.074	637.558	700.59	1.09887	0.136015	0.218875	1
ENSMUSG00000024286	788.473	825.813	751.133	0.909568	-0.136747	0.218889	1
ENSMUSG00000019774	96.5354	105.891	87.1798	0.823298	-0.280513	0.219006	1
ENSMUSG00000058013	786.152	823.494	748.809	0.909307	-0.13716	0.219044	1
ENSMUSG00000024442	1064.4	1016.73	1112.07	1.09377	0.129313	0.219256	1
ENSMUSG00000067629	2866.44	2749.02	2983.86	1.08543	0.118261	0.219331	1
ENSMUSG00000026807	26.2422	22.496	29.9883	1.33305	0.414731	0.219426	1
ENSMUSG00000059486	408.104	430.02	386.189	0.898073	-0.155095	0.219789	1
ENSMUSG00000044433	759.708	723.565	795.851	1.0999	0.137377	0.219834	1
ENSMUSG00000039236	35.1809	39.514	30.8478	0.780681	-0.357195	0.219842	1
ENSMUSG00000007777	299.079	316.353	281.805	0.890795	-0.166834	0.219865	1
ENSMUSG00000043157	17.7925	14.6507	20.9343	1.42889	0.514897	0.219917	1
ENSMUSG00000031555	1284.73	1341.48	1227.99	0.915398	-0.127529	0.220082	1
ENSMUSG00000047897	67.011	73.295	60.7271	0.82853	-0.271375	0.220161	1
ENSMUSG00000020940	96.2667	88.3965	104.137	1.17807	0.23642	0.220175	1
ENSMUSG00000028860	16.2039	19.1277	13.2802	0.694288	-0.526394	0.22019	1
ENSMUSG00000031813	693.583	660.774	726.391	1.0993	0.13659	0.220581	1
ENSMUSG00000042320	60.0027	53.874	66.1315	1.22752	0.295748	0.220583	1
ENSMUSG00000047502	184.305	169.704	198.907	1.17208	0.229068	0.22059	1
ENSMUSG00000024261	2799.37	2916.97	2681.77	0.919366	-0.121288	0.220721	1
ENSMUSG00000055385	0.6072	1.2144	0	0	-Inf	0.220723	1
ENSMUSG00000021553	2.38573	0.794745	3.97672	5.00377	2.32302	0.220764	1
ENSMUSG00000021281	36.1653	31.7036	40.6271	1.28147	0.357794	0.220819	1
ENSMUSG00000079470	279.348	297.291	261.406	0.879293	-0.185584	0.220843	1
ENSMUSG00000024517	112.562	98.5039	126.62	1.28543	0.362247	0.220987	1
ENSMUSG00000021785	303.568	320.717	286.419	0.893058	-0.163174	0.22099	1
ENSMUSG00000053985	426.202	448.667	403.736	0.899856	-0.152234	0.22123	1
ENSMUSG00000015843	84.3123	75.6084	93.0163	1.23024	0.298938	0.221282	1
ENSMUSG00000014704	52.309	57.8844	46.7336	0.807361	-0.308714	0.221428	1
ENSMUSG00000020687	413.449	442.795	384.102	0.867449	-0.205148	0.221433	1
ENSMUSG00000006699	1929.75	2064.29	1795.21	0.86965	-0.201493	0.221697	1
ENSMUSG00000054263	1068.27	1117.38	1019.16	0.912097	-0.132741	0.221775	1
ENSMUSG00000071052	0.603496	1.20699	0	0	-Inf	0.221775	1
ENSMUSG00000005681	30.5738	34.6034	26.5442	0.767097	-0.382518	0.221824	1
ENSMUSG00000045180	1258.95	1204.95	1312.95	1.08963	0.123835	0.221847	1
ENSMUSG00000051652	170.216	159.081	181.351	1.13999	0.189024	0.221863	1
ENSMUSG00000004562	1599.2	1531.52	1666.88	1.08838	0.122188	0.221873	1
ENSMUSG00000022074	19.9834	16.6575	23.3092	1.39932	0.484724	0.221875	1
ENSMUSG00000062170	0.603062	1.20612	0	0	-Inf	0.221899	1
ENSMUSG00000048583	1428.58	1081.05	1776.12	1.64296	0.716293	0.221928	1
ENSMUSG00000029708	485.486	460.596	510.377	1.10808	0.148063	0.221976	1
ENSMUSG00000035673	695.922	662.904	728.941	1.09962	0.137001	0.222092	1
ENSMUSG00000006412	2607.55	2714.08	2501.03	0.921504	-0.117938	0.222104	1
ENSMUSG00000069114	91.6095	84.1874	99.0316	1.17632	0.234285	0.222294	1
ENSMUSG00000045624	216.713	246.302	187.124	0.759735	-0.396431	0.222322	1
ENSMUSG00000110086	98.5366	90.4927	106.58	1.17778	0.236069	0.222399	1
ENSMUSG00000021209	424.047	455.743	392.352	0.860907	-0.216071	0.2224	1
ENSMUSG00000034252	493.726	533.479	453.973	0.850966	-0.232826	0.222531	1
ENSMUSG00000035559	302.921	285.685	320.157	1.12066	0.164353	0.222536	1
ENSMUSG00000050148	2660.81	2550.94	2770.68	1.08614	0.11921	0.222543	1
ENSMUSG00000047586	9.02884	6.82941	11.2283	1.6441	0.717302	0.222826	1
ENSMUSG00000023088	753.185	718.408	787.963	1.09682	0.133326	0.223016	1
ENSMUSG00000002900	331.164	266.326	396.002	1.48691	0.572313	0.223072	1
ENSMUSG00000000594	1736.76	1644.07	1829.46	1.11276	0.154145	0.223177	1
ENSMUSG00000078624	2.85476	1.61071	4.09882	2.54474	1.34752	0.223215	1
ENSMUSG00000006154	181.297	215.294	147.3	0.684179	-0.547554	0.223277	1
ENSMUSG00000032314	489.848	514.259	465.436	0.905061	-0.143913	0.223432	1
ENSMUSG00000054727	0.597712	1.19542	0	0	-Inf	0.22344	1
ENSMUSG00000057156	319.313	337.091	301.535	0.894521	-0.160812	0.223442	1
ENSMUSG00000026213	982.53	938.398	1026.66	1.09406	0.12969	0.223674	1
ENSMUSG00000027778	581.317	609.489	553.144	0.907554	-0.139944	0.223848	1
ENSMUSG00000029430	2950.21	3070.81	2829.6	0.921452	-0.118019	0.223948	1
ENSMUSG00000029427	494.793	519.49	470.095	0.904917	-0.144143	0.224099	1
ENSMUSG00000015850	1001.93	1068.48	935.379	0.875429	-0.191939	0.22422	1
ENSMUSG00000070423	5.65182	7.46989	3.83375	0.513227	-0.96233	0.224232	1
ENSMUSG00000020544	246.007	230.636	261.377	1.13329	0.180514	0.224267	1
ENSMUSG00000028420	215.891	229.559	202.224	0.880922	-0.182914	0.22429	1
ENSMUSG00000004535	1835.47	1939.04	1731.9	0.893176	-0.162984	0.224392	1
ENSMUSG00000036661	215.744	202.892	228.597	1.12669	0.172095	0.224411	1
ENSMUSG00000022216	489.724	465.027	514.421	1.10622	0.145634	0.224434	1
ENSMUSG00000034842	207.845	229.788	185.902	0.809016	-0.30576	0.224482	1
ENSMUSG00000029482	924.173	879.673	968.673	1.10117	0.139043	0.224578	1
ENSMUSG00000073600	254.827	239.394	270.261	1.12894	0.17497	0.224592	1
ENSMUSG00000039914	661.381	692.92	629.843	0.908971	-0.137695	0.224676	1
ENSMUSG00000068115	128.942	119.347	138.537	1.16079	0.215106	0.224755	1
ENSMUSG00000018861	644.243	675.114	613.372	0.908545	-0.13837	0.224815	1
ENSMUSG00000021112	501.165	544.422	457.908	0.84109	-0.249668	0.224838	1
ENSMUSG00000003526	755.628	719.912	791.345	1.09922	0.136485	0.225032	1
ENSMUSG00000036880	577.763	540.152	615.374	1.13926	0.188097	0.225089	1
ENSMUSG00000042379	10.9988	7.06172	14.9359	2.11505	1.08069	0.22511	1
[truncated: 15,988 more rows]
